# Supplementary material for: Cholic Acid-Based Antimicrobial Peptide Mimics as Antibacterial Agents
Source: MDPI journal article supplement (doi:10.3390/ijms23094623), 2022-04-21

# Cholic acid-based antimicrobial peptide mimics as antibacterial agents

Jie Wu <sup>1,†</sup>, Tsz Tin Yu <sup>1,†</sup>, Rajesh Kuppasamy <sup>1,2</sup>, Md. Musfizur Hassan <sup>1</sup>, Amani Alghalayini <sup>3</sup>, Charles G. Cranfield <sup>3</sup>, Mark D. P. Willcox <sup>2</sup>, David StC. Black <sup>1,\*</sup> and Naresh Kumar <sup>1,\*</sup>

<sup>1</sup> School of Chemistry, The University of New South Wales, Sydney, NSW 2052, Australia

<sup>2</sup> School of Optometry and Vision Science, University of New South Wales, Sydney, NSW 2052, Australia

<sup>3</sup> School of Life Sciences, University of Technology Sydney, PO Box 123, Ultimo 2007, Australia

\* Correspondence: d.black@unsw.edu.au (D.StC.B.); n.kumar@unsw.edu.au (N.K.)

† Co-first author

## Contents

|                                                                                                                                                                                                                                                                                                                                                                                                              |    |
|--------------------------------------------------------------------------------------------------------------------------------------------------------------------------------------------------------------------------------------------------------------------------------------------------------------------------------------------------------------------------------------------------------------|----|
| <sup>1</sup> H NMR and <sup>13</sup> C NMR spectra of synthesised compounds .....                                                                                                                                                                                                                                                                                                                            | 5  |
| Acquisition parameters for <sup>1</sup> H NMR and <sup>13</sup> C NMR spectra.....                                                                                                                                                                                                                                                                                                                           | 5  |
| 2-(((3 <i>R</i> ,5 <i>R</i> ,8 <i>R</i> ,9 <i>S</i> ,10 <i>S</i> ,13 <i>R</i> ,14 <i>S</i> ,17 <i>R</i> )-17-(( <i>R</i> )-5-((( <i>S</i> )-3-(1 <i>H</i> -Indol-3-yl)-1-methoxy-1-oxopropan-2-yl)amino)-5-oxopentan-2-yl)-10,13-dimethylhexadecahydro-1 <i>H</i> -cyclopenta[ <i>a</i> ]phenanthren-3-yl)oxy)-2-oxoethan-1-aminium (16a) .....                                                              | 6  |
| 4-(((3 <i>R</i> ,5 <i>R</i> ,8 <i>R</i> ,9 <i>S</i> ,10 <i>S</i> ,13 <i>R</i> ,14 <i>S</i> ,17 <i>R</i> )-17-(( <i>R</i> )-5-((( <i>S</i> )-3-(1 <i>H</i> -Indol-3-yl)-1-methoxy-1-oxopropan-2-yl)amino)-5-oxopentan-2-yl)-10,13-dimethylhexadecahydro-1 <i>H</i> -cyclopenta[ <i>a</i> ]phenanthren-3-yl)oxy)-4-oxobutan-1-aminium (16b).....                                                               | 7  |
| ( <i>S</i> )-5-(((3 <i>R</i> ,5 <i>R</i> ,8 <i>R</i> ,9 <i>S</i> ,10 <i>S</i> ,13 <i>R</i> ,14 <i>S</i> ,17 <i>R</i> )-17-(( <i>R</i> )-5-((( <i>S</i> )-3-(1 <i>H</i> -Indol-3-yl)-1-methoxy-1-oxopropan-2-yl)amino)-5-oxopentan-2-yl)-10,13-dimethylhexadecahydro-1 <i>H</i> -cyclopenta[ <i>a</i> ]phenanthren-3-yl)oxy)-5-oxopentane-1,4-diaminium (16c).....                                            | 8  |
| ( <i>S</i> )-6-(((3 <i>R</i> ,5 <i>R</i> ,8 <i>R</i> ,9 <i>S</i> ,10 <i>S</i> ,13 <i>R</i> ,14 <i>S</i> ,17 <i>R</i> )-17-(( <i>R</i> )-5-((( <i>S</i> )-3-(1 <i>H</i> -Indol-3-yl)-1-methoxy-1-oxopropan-2-yl)amino)-5-oxopentan-2-yl)-10,13-dimethylhexadecahydro-1 <i>H</i> -cyclopenta[ <i>a</i> ]phenanthren-3-yl)oxy)-6-oxohexane-1,5-diaminium (16d).....                                             | 9  |
| 2,2'-(((3 <i>R</i> ,5 <i>S</i> ,7 <i>R</i> ,8 <i>R</i> ,9 <i>S</i> ,10 <i>S</i> ,13 <i>R</i> ,14 <i>S</i> ,17 <i>R</i> )-17-(( <i>R</i> )-5-((( <i>S</i> )-3-(1 <i>H</i> -Indol-3-yl)-1-methoxy-1-oxopropan-2-yl)amino)-5-oxopentan-2-yl)-10,13-dimethylhexadecahydro-1 <i>H</i> -cyclopenta[ <i>a</i> ]phenanthrene-3,7-diyl)bis(oxy))bis(2-oxoethan-1-aminium) (17a) .....                                 | 10 |
| 4,4'-(((3 <i>R</i> ,5 <i>S</i> ,7 <i>R</i> ,8 <i>R</i> ,9 <i>S</i> ,10 <i>S</i> ,13 <i>R</i> ,14 <i>S</i> ,17 <i>R</i> )-17-(( <i>R</i> )-5-((( <i>S</i> )-3-(1 <i>H</i> -Indol-3-yl)-1-methoxy-1-oxopropan-2-yl)amino)-5-oxopentan-2-yl)-10,13-dimethylhexadecahydro-1 <i>H</i> -cyclopenta[ <i>a</i> ]phenanthrene-3,7-diyl)bis(oxy))bis(4-oxobutan-1-aminium) (17b) .....                                 | 11 |
| (4 <i>S</i> ,4' <i>S</i> )-5,5'-(((3 <i>R</i> ,5 <i>S</i> ,7 <i>R</i> ,8 <i>R</i> ,9 <i>S</i> ,10 <i>S</i> ,13 <i>R</i> ,14 <i>S</i> ,17 <i>R</i> )-17-(( <i>R</i> )-5-((( <i>S</i> )-3-(1 <i>H</i> -Indol-3-yl)-1-methoxy-1-oxopropan-2-yl)amino)-5-oxopentan-2-yl)-10,13-dimethylhexadecahydro-1 <i>H</i> -cyclopenta[ <i>a</i> ]phenanthrene-3,7-diyl)bis(oxy))bis(5-oxopentane-1,4-diaminium) (17c)..... | 12 |
| (5 <i>S</i> ,5' <i>S</i> )-6,6'-(((3 <i>R</i> ,5 <i>S</i> ,7 <i>R</i> ,8 <i>R</i> ,9 <i>S</i> ,10 <i>S</i> ,13 <i>R</i> ,14 <i>S</i> ,17 <i>R</i> )-17-(( <i>R</i> )-5-((( <i>S</i> )-3-(1 <i>H</i> -Indol-3-yl)-1-methoxy-1-oxopropan-2-yl)amino)-5-oxopentan-2-yl)-10,13-dimethylhexadecahydro-1 <i>H</i> -cyclopenta[ <i>a</i> ]phenanthrene-3,7-diyl)bis(oxy))bis(6-oxohexane-1,5-diaminium) (17d) ..... | 13 |

|                                                                                                                                                                                                                                                                                                                                                                                                                                                         |    |
|---------------------------------------------------------------------------------------------------------------------------------------------------------------------------------------------------------------------------------------------------------------------------------------------------------------------------------------------------------------------------------------------------------------------------------------------------------|----|
| 2,2'-(((3 <i>R</i> ,5 <i>R</i> ,8 <i>R</i> ,9 <i>S</i> ,10 <i>S</i> ,12 <i>S</i> ,13 <i>R</i> ,14 <i>S</i> ,17 <i>R</i> )-17-(( <i>R</i> )-5-((( <i>S</i> )-3-(1 <i>H</i> -Indol-3-yl)-1-methoxy-1-oxopropan-2-yl)amino)-5-oxopentan-2-yl)-10,13-dimethylhexadecahydro-1 <i>H</i> -cyclopenta[ <i>a</i> ]phenanthrene-3,12-diyl)bis(oxy))bis(2-oxoethan-1-aminium) (18a) .....                                                                          | 14 |
| 2,2'-(((3 <i>R</i> ,5 <i>S</i> ,7 <i>R</i> ,8 <i>R</i> ,9 <i>S</i> ,10 <i>S</i> ,12 <i>S</i> ,13 <i>R</i> ,14 <i>S</i> ,17 <i>R</i> )-17-(( <i>R</i> )-5-((( <i>S</i> )-3-(1 <i>H</i> -Indol-3-yl)-1-methoxy-1-oxopropan-2-yl)amino)-5-oxopentan-2-yl)-3-(2-aminoacetoxy)-10,13-dimethylhexadecahydro-1 <i>H</i> -cyclopenta[ <i>a</i> ]phenanthrene-7,12-diyl)bis(oxy))bis(2-oxoethan-1-aminium) (19a) .....                                           | 15 |
| 4,4',4''-(((3 <i>R</i> ,5 <i>S</i> ,7 <i>R</i> ,8 <i>R</i> ,9 <i>S</i> ,10 <i>S</i> ,12 <i>S</i> ,13 <i>R</i> ,14 <i>S</i> ,17 <i>R</i> )-17-(( <i>R</i> )-5-((( <i>S</i> )-3-(1 <i>H</i> -Indol-3-yl)-1-methoxy-1-oxopropan-2-yl)amino)-5-oxopentan-2-yl)-10,13-dimethylhexadecahydro-1 <i>H</i> -cyclopenta[ <i>a</i> ]phenanthrene-3,7,12-triyl)tris(oxy))tris(4-oxobutan-1-aminium) (19b).....                                                      | 16 |
| (4 <i>S</i> ,4' <i>S</i> ,4'' <i>S</i> )-5,5',5''-(((3 <i>R</i> ,5 <i>S</i> ,7 <i>R</i> ,8 <i>R</i> ,9 <i>S</i> ,10 <i>S</i> ,12 <i>S</i> ,13 <i>R</i> ,14 <i>S</i> ,17 <i>R</i> )-17-(( <i>R</i> )-5-((( <i>S</i> )-3-(1 <i>H</i> -Indol-3-yl)-1-methoxy-1-oxopropan-2-yl)amino)-5-oxopentan-2-yl)-10,13-dimethylhexadecahydro-1 <i>H</i> -cyclopenta[ <i>a</i> ]phenanthrene-3,7,12-triyl)tris(oxy))tris(5-oxopentane-1,4-diaminium) (19c) .....      | 17 |
| (5 <i>S</i> ,5' <i>S</i> ,5'' <i>S</i> )-6,6',6''-(((3 <i>R</i> ,5 <i>S</i> ,7 <i>R</i> ,8 <i>R</i> ,9 <i>S</i> ,10 <i>S</i> ,12 <i>S</i> ,13 <i>R</i> ,14 <i>S</i> ,17 <i>R</i> )-17-(( <i>R</i> )-5-((( <i>S</i> )-3-(1 <i>H</i> -Indol-3-yl)-1-methoxy-1-oxopropan-2-yl)amino)-5-oxopentan-2-yl)-10,13-dimethylhexadecahydro-1 <i>H</i> -cyclopenta[ <i>a</i> ]phenanthrene-3,7,12-triyl)tris(oxy))tris(6-oxohexane-1,5-diaminium) (19d) .....       | 18 |
| (4 <i>S</i> ,4' <i>S</i> )-5,5'-(((3 <i>R</i> ,5 <i>S</i> ,7 <i>R</i> ,8 <i>R</i> ,9 <i>S</i> ,10 <i>S</i> ,13 <i>R</i> ,14 <i>S</i> ,17 <i>R</i> )-17-(( <i>R</i> )-5-((( <i>S</i> )-1-Methoxy-1-oxo-3-phenylpropan-2-yl)amino)-5-oxopentan-2-yl)-10,13-dimethylhexadecahydro-1 <i>H</i> -cyclopenta[ <i>a</i> ]phenanthrene-3,7-diyl)bis(oxy))bis(5-oxopentane-1,4-diaminium) (20) .....                                                              | 19 |
| (4 <i>S</i> ,4' <i>S</i> )-5,5'-(((3 <i>R</i> ,5 <i>S</i> ,7 <i>R</i> ,8 <i>R</i> ,9 <i>S</i> ,10 <i>S</i> ,13 <i>R</i> ,14 <i>S</i> ,17 <i>R</i> )-17-(( <i>R</i> )-5-(Benzylamino)-5-oxopentan-2-yl)-10,13-dimethylhexadecahydro-1 <i>H</i> -cyclopenta[ <i>a</i> ]phenanthrene-3,7-diyl)bis(oxy))bis(5-oxopentane-1,4-diaminium) (21) .....                                                                                                          | 19 |
| ((4-(((3 <i>R</i> ,5 <i>R</i> ,8 <i>R</i> ,9 <i>S</i> ,10 <i>S</i> ,13 <i>R</i> ,14 <i>S</i> ,17 <i>R</i> )-17-(( <i>R</i> )-5-((( <i>S</i> )-3-(1 <i>H</i> -Indol-3-yl)-1-methoxy-1-oxopropan-2-yl)amino)-5-oxopentan-2-yl)-10,13-dimethylhexadecahydro-1 <i>H</i> -cyclopenta[ <i>a</i> ]phenanthren-3-yl)oxy)-4-oxobutyl)amino)(amino)methaniminium (23).....                                                                                        | 20 |
| Methyl (( <i>R</i> )-4-((3 <i>R</i> ,5 <i>R</i> ,8 <i>R</i> ,9 <i>S</i> ,10 <i>S</i> ,13 <i>R</i> ,14 <i>S</i> ,17 <i>R</i> )-3-((L-lysylglycyl)oxy)-10,13-dimethylhexadecahydro-1 <i>H</i> -cyclopenta[ <i>a</i> ]phenanthren-17-yl)pentanoyl)-L-tryptophanate (25) ..                                                                                                                                                                                 | 21 |
| 1,1',1''-((((3 <i>R</i> ,5 <i>S</i> ,7 <i>R</i> ,8 <i>R</i> ,9 <i>S</i> ,10 <i>S</i> ,12 <i>S</i> ,13 <i>R</i> ,14 <i>S</i> ,17 <i>R</i> )-17-(( <i>R</i> )-5-((( <i>S</i> )-3-(1 <i>H</i> -Indol-3-yl)-1-methoxy-1-oxopropan-2-yl)amino)-5-oxopentan-2-yl)-10,13-dimethylhexadecahydro-1 <i>H</i> -cyclopenta[ <i>a</i> ]phenanthrene-3,7,12-triyl)tris(oxy))tris(2-oxoethane-2,1-diyl))tris(azanediyl))tris(3-methyl-1-oxobutan-2-aminium) (27) ..... | 22 |
| High resolution mass spectra (HRMS) of synthesised compounds .....                                                                                                                                                                                                                                                                                                                                                                                      | 23 |
| 2-(((3 <i>R</i> ,5 <i>R</i> ,8 <i>R</i> ,9 <i>S</i> ,10 <i>S</i> ,13 <i>R</i> ,14 <i>S</i> ,17 <i>R</i> )-17-(( <i>R</i> )-5-((( <i>S</i> )-3-(1 <i>H</i> -Indol-3-yl)-1-methoxy-1-oxopropan-2-yl)amino)-5-oxopentan-2-yl)-10,13-dimethylhexadecahydro-1 <i>H</i> -cyclopenta[ <i>a</i> ]phenanthren-3-yl)oxy)-2-oxoethan-1-aminium (16a) .....                                                                                                         | 23 |
| 4-(((3 <i>R</i> ,5 <i>R</i> ,8 <i>R</i> ,9 <i>S</i> ,10 <i>S</i> ,13 <i>R</i> ,14 <i>S</i> ,17 <i>R</i> )-17-(( <i>R</i> )-5-((( <i>S</i> )-3-(1 <i>H</i> -Indol-3-yl)-1-methoxy-1-oxopropan-2-yl)amino)-5-oxopentan-2-yl)-10,13-dimethylhexadecahydro-1 <i>H</i> -cyclopenta[ <i>a</i> ]phenanthren-3-yl)oxy)-4-oxobutan-1-aminium (16b).....                                                                                                          | 25 |
| ( <i>S</i> )-5-(((3 <i>R</i> ,5 <i>R</i> ,8 <i>R</i> ,9 <i>S</i> ,10 <i>S</i> ,13 <i>R</i> ,14 <i>S</i> ,17 <i>R</i> )-17-(( <i>R</i> )-5-((( <i>S</i> )-3-(1 <i>H</i> -Indol-3-yl)-1-methoxy-1-oxopropan-2-yl)amino)-5-oxopentan-2-yl)-10,13-dimethylhexadecahydro-1 <i>H</i> -cyclopenta[ <i>a</i> ]phenanthren-3-yl)oxy)-5-oxopentane-1,4-diaminium (16c).....                                                                                       | 27 |

|                                                                                                                                                                                                                                                                                                                                                                                                                                                    |    |
|----------------------------------------------------------------------------------------------------------------------------------------------------------------------------------------------------------------------------------------------------------------------------------------------------------------------------------------------------------------------------------------------------------------------------------------------------|----|
| ( <i>S</i> )-6-(((3 <i>R</i> ,5 <i>R</i> ,8 <i>R</i> ,9 <i>S</i> ,10 <i>S</i> ,13 <i>R</i> ,14 <i>S</i> ,17 <i>R</i> )-17-(( <i>R</i> )-5-((( <i>S</i> )-3-(1 <i>H</i> -Indol-3-yl)-1-methoxy-1-oxopropan-2-yl)amino)-5-oxopentan-2-yl)-10,13-dimethylhexadecahydro-1 <i>H</i> -cyclopenta[ <i>a</i> ]phenanthren-3-yl)oxy)-6-oxohexane-1,5-diaminium (16d).....                                                                                   | 29 |
| 2,2'-(((3 <i>R</i> ,5 <i>S</i> ,7 <i>R</i> ,8 <i>R</i> ,9 <i>S</i> ,10 <i>S</i> ,13 <i>R</i> ,14 <i>S</i> ,17 <i>R</i> )-17-(( <i>R</i> )-5-((( <i>S</i> )-3-(1 <i>H</i> -Indol-3-yl)-1-methoxy-1-oxopropan-2-yl)amino)-5-oxopentan-2-yl)-10,13-dimethylhexadecahydro-1 <i>H</i> -cyclopenta[ <i>a</i> ]phenanthrene-3,7-diyl)bis(oxy))bis(2-oxoethan-1-aminium) (17a) .....                                                                       | 31 |
| 4,4'-(((3 <i>R</i> ,5 <i>S</i> ,7 <i>R</i> ,8 <i>R</i> ,9 <i>S</i> ,10 <i>S</i> ,13 <i>R</i> ,14 <i>S</i> ,17 <i>R</i> )-17-(( <i>R</i> )-5-((( <i>S</i> )-3-(1 <i>H</i> -Indol-3-yl)-1-methoxy-1-oxopropan-2-yl)amino)-5-oxopentan-2-yl)-10,13-dimethylhexadecahydro-1 <i>H</i> -cyclopenta[ <i>a</i> ]phenanthrene-3,7-diyl)bis(oxy))bis(4-oxobutan-1-aminium) (17b) .....                                                                       | 33 |
| (4 <i>S</i> ,4' <i>S</i> )-5,5'-(((3 <i>R</i> ,5 <i>S</i> ,7 <i>R</i> ,8 <i>R</i> ,9 <i>S</i> ,10 <i>S</i> ,13 <i>R</i> ,14 <i>S</i> ,17 <i>R</i> )-17-(( <i>R</i> )-5-((( <i>S</i> )-3-(1 <i>H</i> -Indol-3-yl)-1-methoxy-1-oxopropan-2-yl)amino)-5-oxopentan-2-yl)-10,13-dimethylhexadecahydro-1 <i>H</i> -cyclopenta[ <i>a</i> ]phenanthrene-3,7-diyl)bis(oxy))bis(5-oxopentane-1,4-diaminium) (17c).....                                       | 35 |
| (5 <i>S</i> ,5' <i>S</i> )-6,6'-(((3 <i>R</i> ,5 <i>S</i> ,7 <i>R</i> ,8 <i>R</i> ,9 <i>S</i> ,10 <i>S</i> ,13 <i>R</i> ,14 <i>S</i> ,17 <i>R</i> )-17-(( <i>R</i> )-5-((( <i>S</i> )-3-(1 <i>H</i> -Indol-3-yl)-1-methoxy-1-oxopropan-2-yl)amino)-5-oxopentan-2-yl)-10,13-dimethylhexadecahydro-1 <i>H</i> -cyclopenta[ <i>a</i> ]phenanthrene-3,7-diyl)bis(oxy))bis(6-oxohexane-1,5-diaminium) (17d) .....                                       | 37 |
| 2,2'-(((3 <i>R</i> ,5 <i>R</i> ,8 <i>R</i> ,9 <i>S</i> ,10 <i>S</i> ,12 <i>S</i> ,13 <i>R</i> ,14 <i>S</i> ,17 <i>R</i> )-17-(( <i>R</i> )-5-((( <i>S</i> )-3-(1 <i>H</i> -Indol-3-yl)-1-methoxy-1-oxopropan-2-yl)amino)-5-oxopentan-2-yl)-10,13-dimethylhexadecahydro-1 <i>H</i> -cyclopenta[ <i>a</i> ]phenanthrene-3,12-diyl)bis(oxy))bis(2-oxoethan-1-aminium) (18a) .....                                                                     | 39 |
| 2,2'-(((3 <i>R</i> ,5 <i>S</i> ,7 <i>R</i> ,8 <i>R</i> ,9 <i>S</i> ,10 <i>S</i> ,12 <i>S</i> ,13 <i>R</i> ,14 <i>S</i> ,17 <i>R</i> )-17-(( <i>R</i> )-5-((( <i>S</i> )-3-(1 <i>H</i> -Indol-3-yl)-1-methoxy-1-oxopropan-2-yl)amino)-5-oxopentan-2-yl)-3-(2-aminoacetoxy)-10,13-dimethylhexadecahydro-1 <i>H</i> -cyclopenta[ <i>a</i> ]phenanthrene-7,12-diyl)bis(oxy))bis(2-oxoethan-1-aminium) (19a) .....                                      | 41 |
| 4,4',4''-(((3 <i>R</i> ,5 <i>S</i> ,7 <i>R</i> ,8 <i>R</i> ,9 <i>S</i> ,10 <i>S</i> ,12 <i>S</i> ,13 <i>R</i> ,14 <i>S</i> ,17 <i>R</i> )-17-(( <i>R</i> )-5-((( <i>S</i> )-3-(1 <i>H</i> -Indol-3-yl)-1-methoxy-1-oxopropan-2-yl)amino)-5-oxopentan-2-yl)-10,13-dimethylhexadecahydro-1 <i>H</i> -cyclopenta[ <i>a</i> ]phenanthrene-3,7,12-triyl)tris(oxy))tris(4-oxobutan-1-aminium) (19b).....                                                 | 43 |
| (4 <i>S</i> ,4' <i>S</i> ,4'' <i>S</i> )-5,5',5''-(((3 <i>R</i> ,5 <i>S</i> ,7 <i>R</i> ,8 <i>R</i> ,9 <i>S</i> ,10 <i>S</i> ,12 <i>S</i> ,13 <i>R</i> ,14 <i>S</i> ,17 <i>R</i> )-17-(( <i>R</i> )-5-((( <i>S</i> )-3-(1 <i>H</i> -Indol-3-yl)-1-methoxy-1-oxopropan-2-yl)amino)-5-oxopentan-2-yl)-10,13-dimethylhexadecahydro-1 <i>H</i> -cyclopenta[ <i>a</i> ]phenanthrene-3,7,12-triyl)tris(oxy))tris(5-oxopentane-1,4-diaminium) (19c) ..... | 45 |
| (5 <i>S</i> ,5' <i>S</i> ,5'' <i>S</i> )-6,6',6''-(((3 <i>R</i> ,5 <i>S</i> ,7 <i>R</i> ,8 <i>R</i> ,9 <i>S</i> ,10 <i>S</i> ,12 <i>S</i> ,13 <i>R</i> ,14 <i>S</i> ,17 <i>R</i> )-17-(( <i>R</i> )-5-((( <i>S</i> )-3-(1 <i>H</i> -Indol-3-yl)-1-methoxy-1-oxopropan-2-yl)amino)-5-oxopentan-2-yl)-10,13-dimethylhexadecahydro-1 <i>H</i> -cyclopenta[ <i>a</i> ]phenanthrene-3,7,12-triyl)tris(oxy))tris(6-oxohexane-1,5-diaminium) (19d) .....  | 47 |
| (4 <i>S</i> ,4' <i>S</i> )-5,5'-(((3 <i>R</i> ,5 <i>S</i> ,7 <i>R</i> ,8 <i>R</i> ,9 <i>S</i> ,10 <i>S</i> ,13 <i>R</i> ,14 <i>S</i> ,17 <i>R</i> )-17-(( <i>R</i> )-5-((( <i>S</i> )-1-Methoxy-1-oxo-3-phenylpropan-2-yl)amino)-5-oxopentan-2-yl)-10,13-dimethylhexadecahydro-1 <i>H</i> -cyclopenta[ <i>a</i> ]phenanthrene-3,7-diyl)bis(oxy))bis(5-oxopentane-1,4-diaminium) (20) .....                                                         | 49 |
| (4 <i>S</i> ,4' <i>S</i> )-5,5'-(((3 <i>R</i> ,5 <i>S</i> ,7 <i>R</i> ,8 <i>R</i> ,9 <i>S</i> ,10 <i>S</i> ,13 <i>R</i> ,14 <i>S</i> ,17 <i>R</i> )-17-(( <i>R</i> )-5-(Benzylamino)-5-oxopentan-2-yl)-10,13-dimethylhexadecahydro-1 <i>H</i> -cyclopenta[ <i>a</i> ]phenanthrene-3,7-diyl)bis(oxy))bis(5-oxopentane-1,4-diaminium) (21) .....                                                                                                     | 51 |
| ((4-(((3 <i>R</i> ,5 <i>R</i> ,8 <i>R</i> ,9 <i>S</i> ,10 <i>S</i> ,13 <i>R</i> ,14 <i>S</i> ,17 <i>R</i> )-17-(( <i>R</i> )-5-((( <i>S</i> )-3-(1 <i>H</i> -Indol-3-yl)-1-methoxy-1-oxopropan-2-yl)amino)-5-oxopentan-2-yl)-10,13-dimethylhexadecahydro-1 <i>H</i> -cyclopenta[ <i>a</i> ]phenanthren-3-yl)oxy)-4-oxobutyl)amino)(amino)methaniminium (23).....                                                                                   | 53 |

Methyl ((*R*)-4-((3*R*,5*R*,8*R*,9*S*,10*S*,13*R*,14*S*,17*R*)-3-((*L*-lysylglycyl)oxy)-10,13-dimethylhexadecahydro-1*H*-cyclopenta[*a*]phenanthren-17-yl)pentanoyl)-*L*-tryptophanate (25)..55

1,1',1''-((((3*R*,5*S*,7*R*,8*R*,9*S*,10*S*,12*S*,13*R*,14*S*,17*R*)-17-((*R*)-5-(((*S*)-3-(1*H*-Indol-3-yl)-1-methoxy-1-oxopropan-2-yl)amino)-5-oxopentan-2-yl)-10,13-dimethylhexadecahydro-1*H*-cyclopenta[*a*]phenanthrene-3,7,12-triyl)tris(oxy))tris(2-oxoethane-2,1-diyl))tris(azanediyl))tris(3-methyl-1-oxobutan-2-aminium) (27) .....57

# $^1\text{H}$ NMR and $^{13}\text{C}$ NMR spectra of synthesised compounds

Acquisition parameters for  $^1\text{H}$  NMR and  $^{13}\text{C}$  NMR spectra

$^1\text{H}$  NMR:

Standard Bruker pulse program “zg” was used and the delay (D1) was set to 5 s.

| Experiment  |              |                              |
|-------------|--------------|------------------------------|
| PULPROG     | zg           | Current pulse program        |
| AQ_mod      | DQD          | Acquisition mode             |
| TD          | 32768        | Size of fid                  |
| DS          | 0            | Number of dummy scans        |
| NS          | 8            | Number of scans              |
| TD0         | 1            | Loop count for 'td0'         |
| Width       |              |                              |
| SW [ppm]    | 15.9778      | Spectral width               |
| SWH [Hz]    | 6393.862     | Spectral width               |
| AQ [sec]    | 2.5624576    | Acquisition time             |
| FIDRES [Hz] | 0.390250     | Fid resolution               |
| FW [Hz]     | 4032000.000  | Filter width                 |
| Nucleus 1   |              |                              |
| NUC1        | $^1\text{H}$ | Observe nucleus              |
| O1 [Hz]     | 2601.10      | Transmitter frequency offset |
| O1P [ppm]   | 6.500        | Transmitter frequency offset |
| SFO1 [MHz]  | 400.1726011  | Transmitter frequency        |
| BF1 [MHz]   | 400.1700000  | Basic transmitter frequency  |

$^{13}\text{C}\{^1\text{H}\}$  NMR:

Standard Bruker pulse program “zgpg30” was used and the delay (D1) was set to 1 s.

| Experiment  |                 |                                 |
|-------------|-----------------|---------------------------------|
| PULPROG     | zgpg30          | Current pulse program           |
| AQ_mod      | DQD             | Acquisition mode                |
| TD          | 65536           | Size of fid                     |
| DS          | 2               | Number of dummy scans           |
| NS          | 256             | Number of scans                 |
| TD0         | 1               | Loop count for 'td0'            |
| Width       |                 |                                 |
| SW [ppm]    | 238.8728        | Spectral width                  |
| SWH [Hz]    | 24038.461       | Spectral width                  |
| AQ [sec]    | 1.3631488       | Acquisition time                |
| FIDRES [Hz] | 0.733596        | Fid resolution                  |
| FW [Hz]     | 4032000.000     | Filter width                    |
| Nucleus 1   |                 |                                 |
| NUC1        | $^{13}\text{C}$ | Observe nucleus                 |
| O1 [Hz]     | 10061.66        | Transmitter frequency offset    |
| O1P [ppm]   | 99.994          | Transmitter frequency offset    |
| SFO1 [MHz]  | 100.6328882     | Transmitter frequency           |
| BF1 [MHz]   | 100.6228265     | Basic transmitter frequency     |
| Nucleus 2   |                 |                                 |
| NUC2        | $^1\text{H}$    | 2nd nucleus                     |
| O2 [Hz]     | 1600.68         | Frequency offset of 2nd nucleus |
| O2P [ppm]   | 4.000           | Frequency offset of 2nd nucleus |
| SFO2 [MHz]  | 400.1716007     | Frequency of 2nd nucleus        |
| BF2 [MHz]   | 400.1700000     | Basic frequency of 2nd nucleus  |

2-(((3*R*,5*R*,8*R*,9*S*,10*S*,13*R*,14*S*,17*R*)-17-((*R*)-5-(((*S*)-3-(1*H*-Indol-3-yl)-1-methoxy-1-oxopropan-2-yl)amino)-5-oxopentan-2-yl)-10,13-dimethylhexadecahydro-1*H*-cyclopenta[*a*]phenanthren-3-yl)oxy)-2-oxoethan-1-aminium (**16a**)

$^1\text{H}$  NMR (400 MHz,  $\text{DMSO}-d_6$ ):

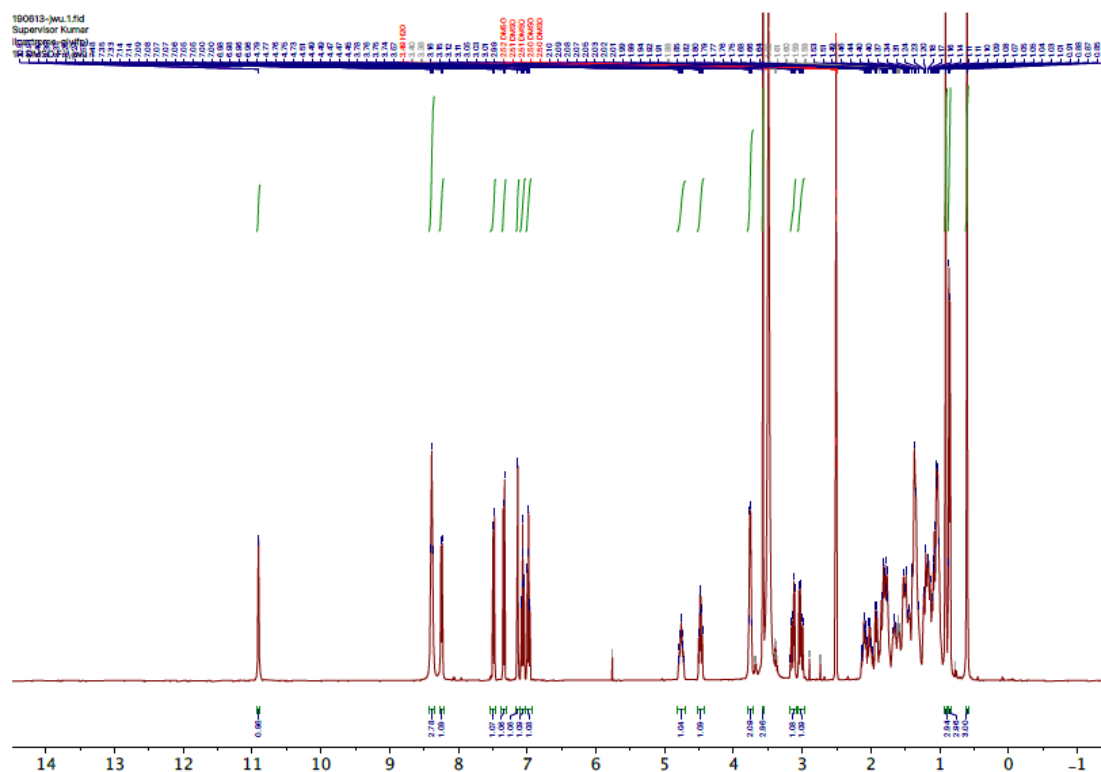

$^{13}\text{C}$  NMR (100 MHz,  $\text{DMSO}-d_6$ ):

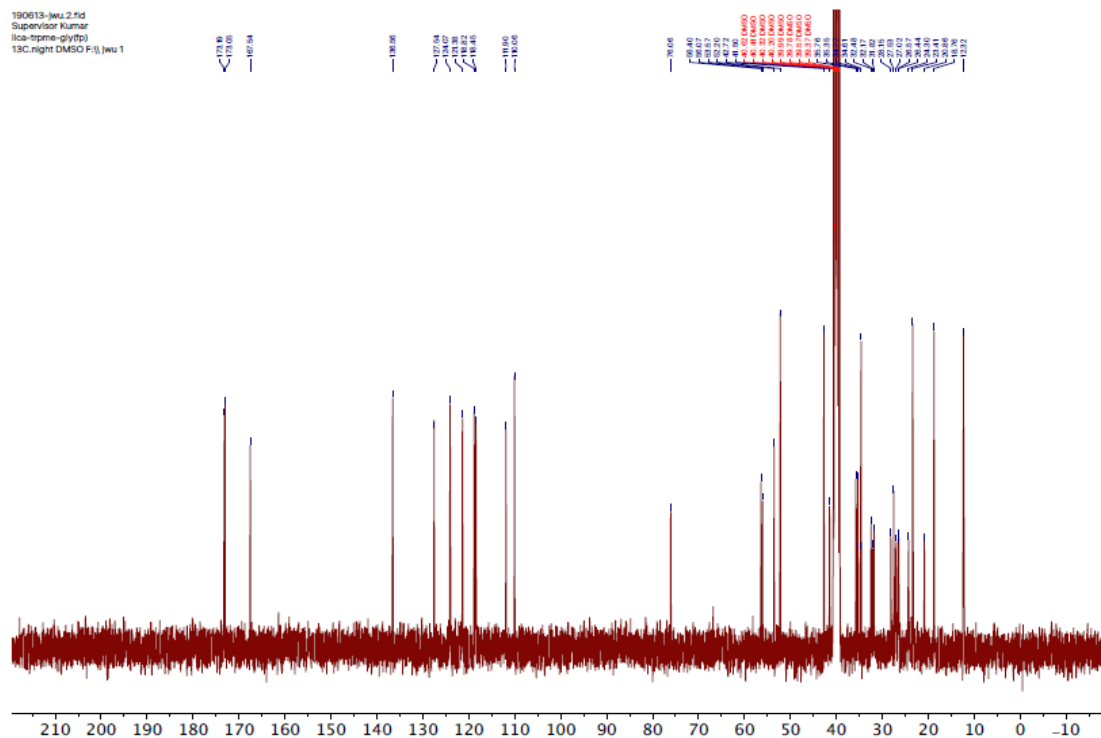

<sup>1</sup>H NMR (400 MHz, DMSO-*d*<sub>6</sub>):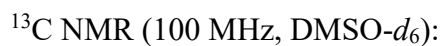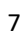

(*S*)-5-(((3*R*,5*R*,8*R*,9*S*,10*S*,13*R*,14*S*,17*R*)-17-((*R*)-5-(((*S*)-3-(1*H*-Indol-3-yl)-1-methoxy-1-oxopropan-2-yl)amino)-5-oxopentan-2-yl)-10,13-dimethylhexadecahydro-1*H*-cyclopenta[*a*]phenanthren-3-yl)oxy)-5-oxopentane-1,4-diaminium (**16c**)

$^1\text{H}$  NMR (400 MHz,  $\text{DMSO}-d_6$ ):

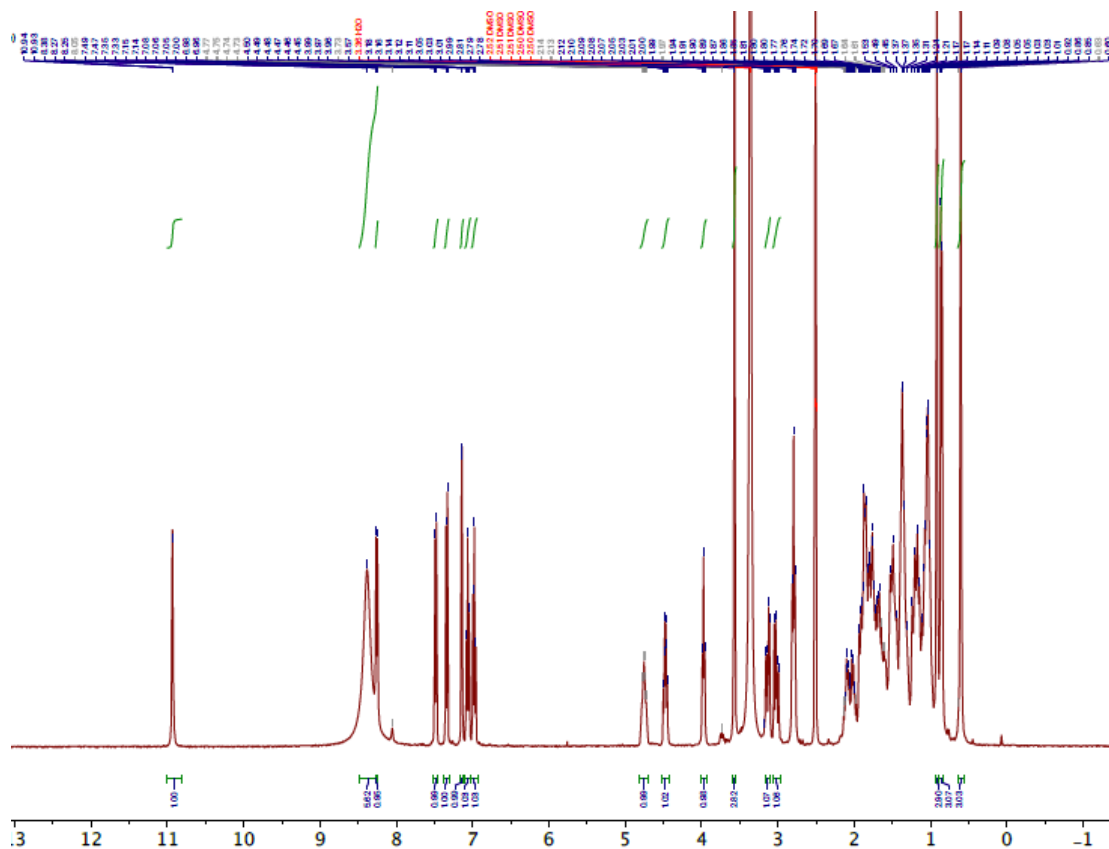

$^{13}\text{C}$  NMR (100 MHz,  $\text{DMSO}-d_6$ ):

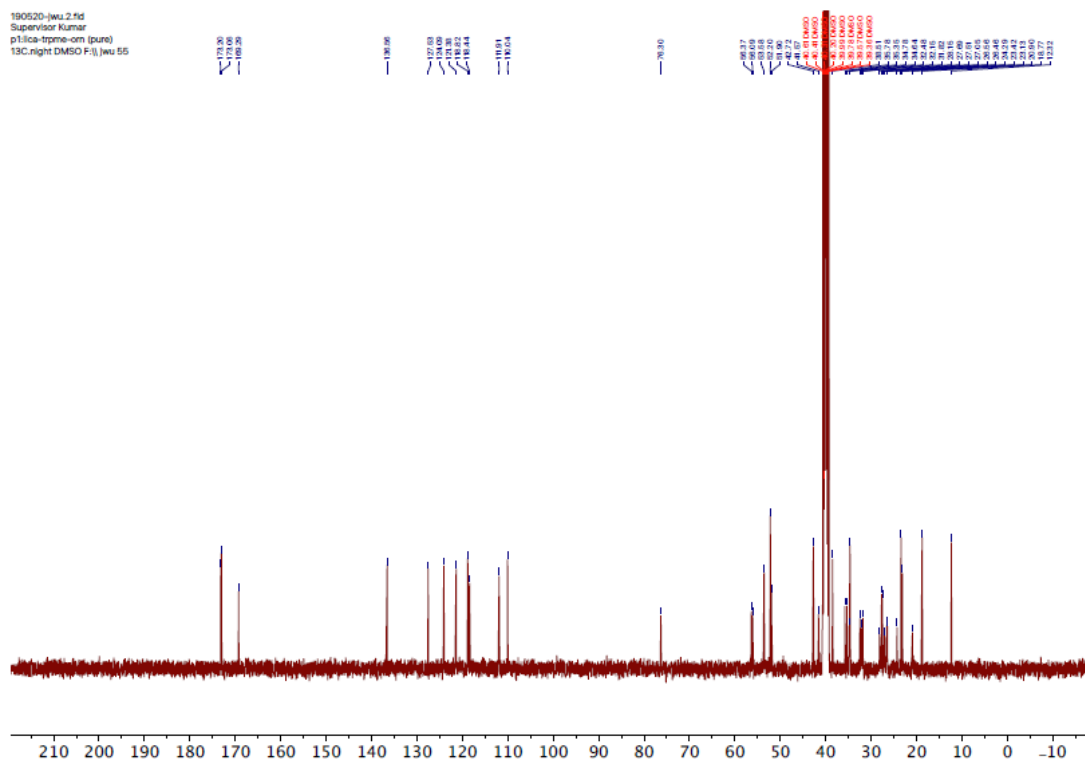



<sup>1</sup>H NMR (400 MHz, DMSO-*d*<sub>6</sub>):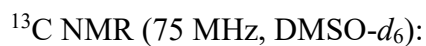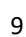

<sup>1</sup>H NMR (400 MHz, DMSO-*d*<sub>6</sub>):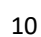

<sup>1</sup>H NMR (400 MHz, DMSO-*d*<sub>6</sub>):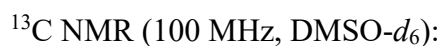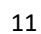

(4*S*,4'*S*)-5,5'-(((3*R*,5*S*,7*R*,8*R*,9*S*,10*S*,13*R*,14*S*,17*R*)-17-((*R*)-5-(((*S*)-3-(1*H*-Indol-3-yl)-1-methoxy-1-oxopropan-2-yl)amino)-5-oxopentane-2-yl)-10,13-dimethylhexadecahydro-1*H*-cyclopenta[*a*]phenanthrene-3,7-diyl)bis(oxy))bis(5-oxopentane-1,4-diaminium) (**17c**)  
<sup>1</sup>H NMR (400 MHz, DMSO-*d*<sub>6</sub>):

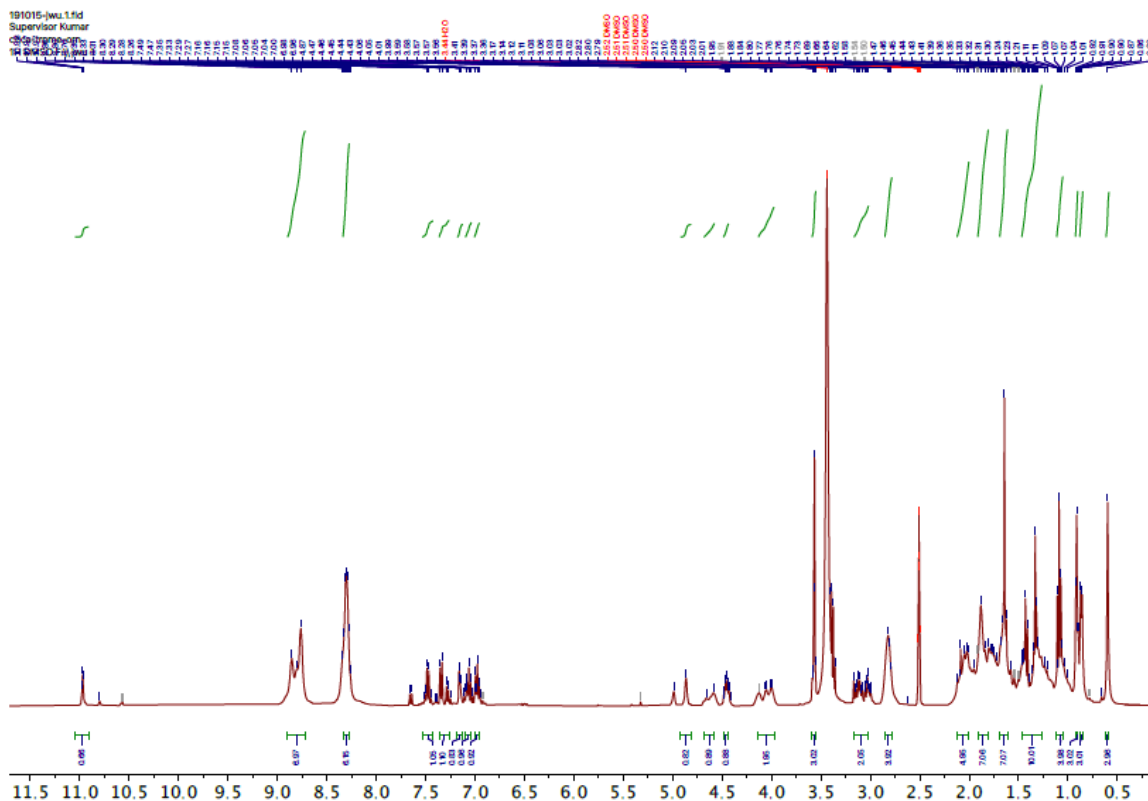

<sup>13</sup>C NMR (100 MHz, DMSO-*d*<sub>6</sub>):

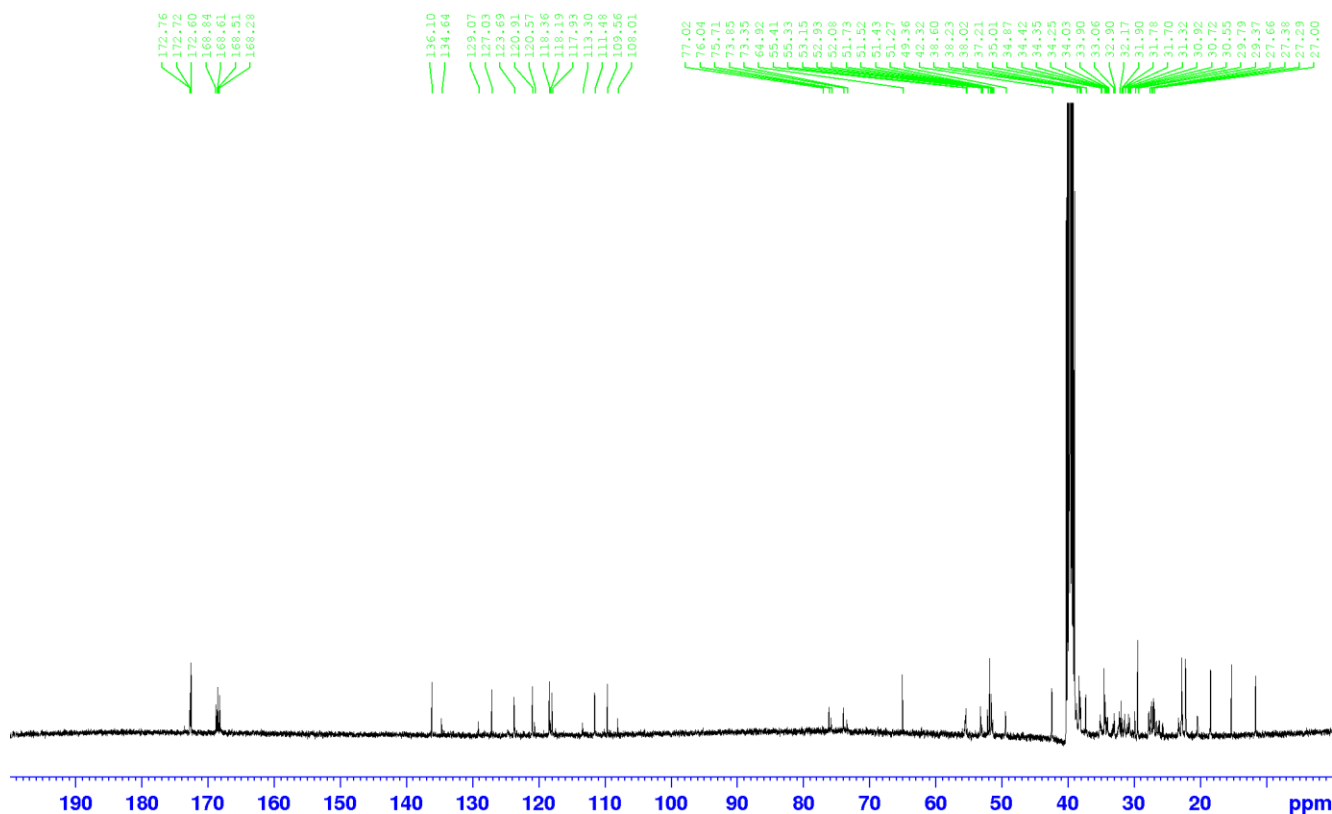

<sup>1</sup>H NMR (600 MHz, DMSO-*d*<sub>6</sub>):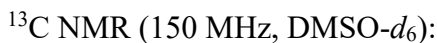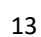

2,2'-(((3*R*,5*R*,8*R*,9*S*,10*S*,12*S*,13*R*,14*S*,17*R*)-17-((*R*)-5-(((*S*)-3-(1*H*-Indol-3-yl)-1-methoxy-1-oxopropan-2-yl)amino)-5-oxopentan-2-yl)-10,13-dimethylhexadecahydro-1*H*-cyclopenta[*a*]phenanthrene-3,12-diyl)bis(oxy))bis(2-oxoethan-1-aminium) (**18a**)

<sup>1</sup>H NMR (300 MHz, DMSO-*d*<sub>6</sub>):

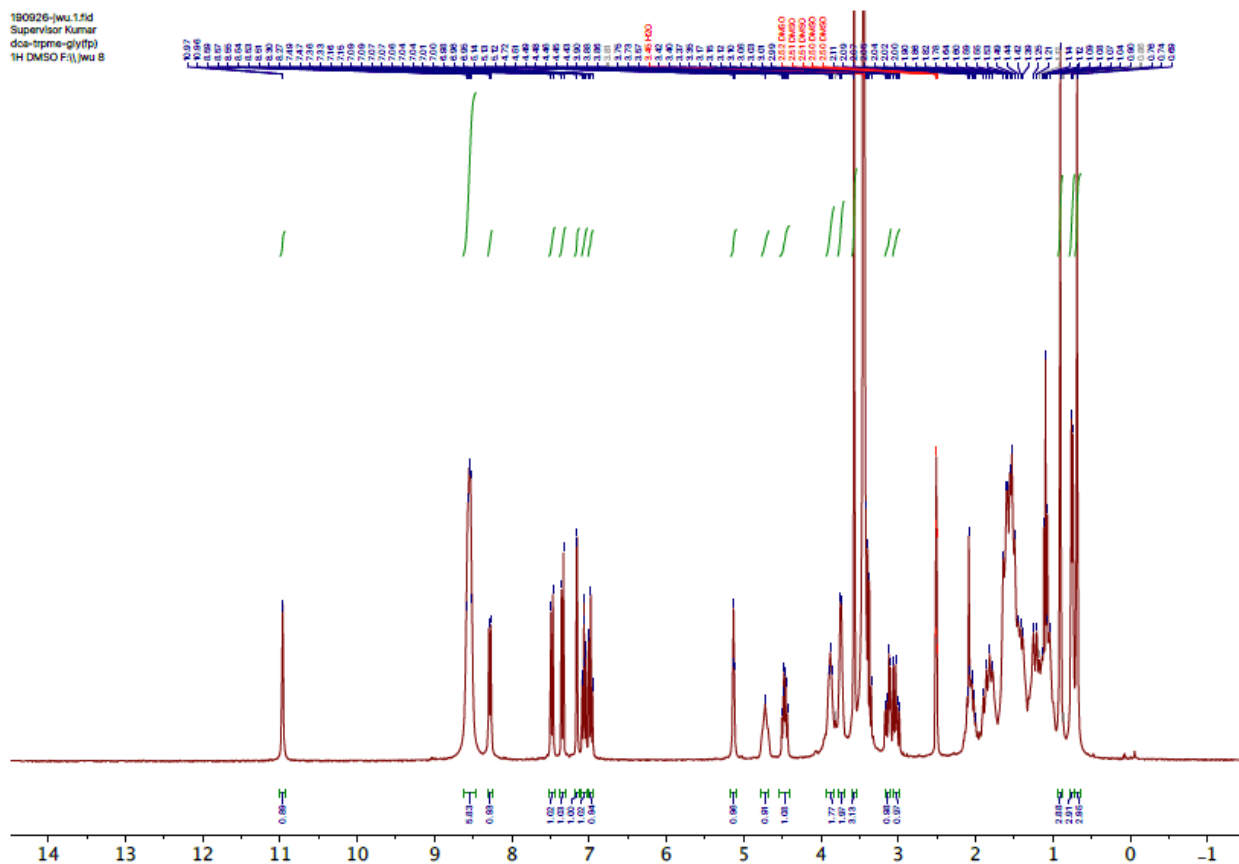

<sup>13</sup>C NMR (75 MHz, DMSO-*d*<sub>6</sub>):

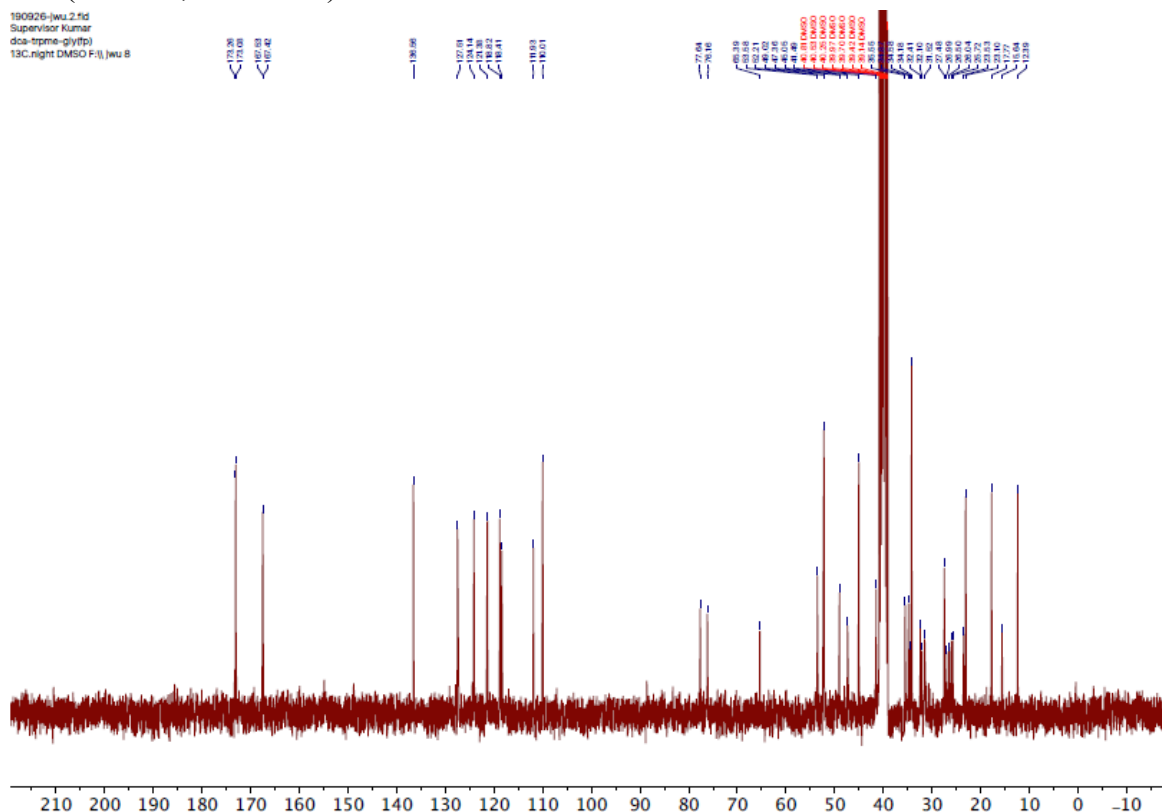

2,2'-(((3*R*,5*S*,7*R*,8*R*,9*S*,10*S*,12*S*,13*R*,14*S*,17*R*)-17-((*R*)-5-(((*S*)-3-(1*H*-Indol-3-yl)-1-methoxy-1-oxopropan-2-yl)amino)-5-oxopentan-2-yl)-3-(2-aminoacetoxy)-10,13-dimethylhexadecahydro-1*H*-cyclopenta[*a*]phenanthrene-7,12-diyl)bis(oxy))bis(2-oxoethan-1-aminium) (**19a**)

<sup>1</sup>H NMR (400 MHz, DMSO-*d*<sub>6</sub>):

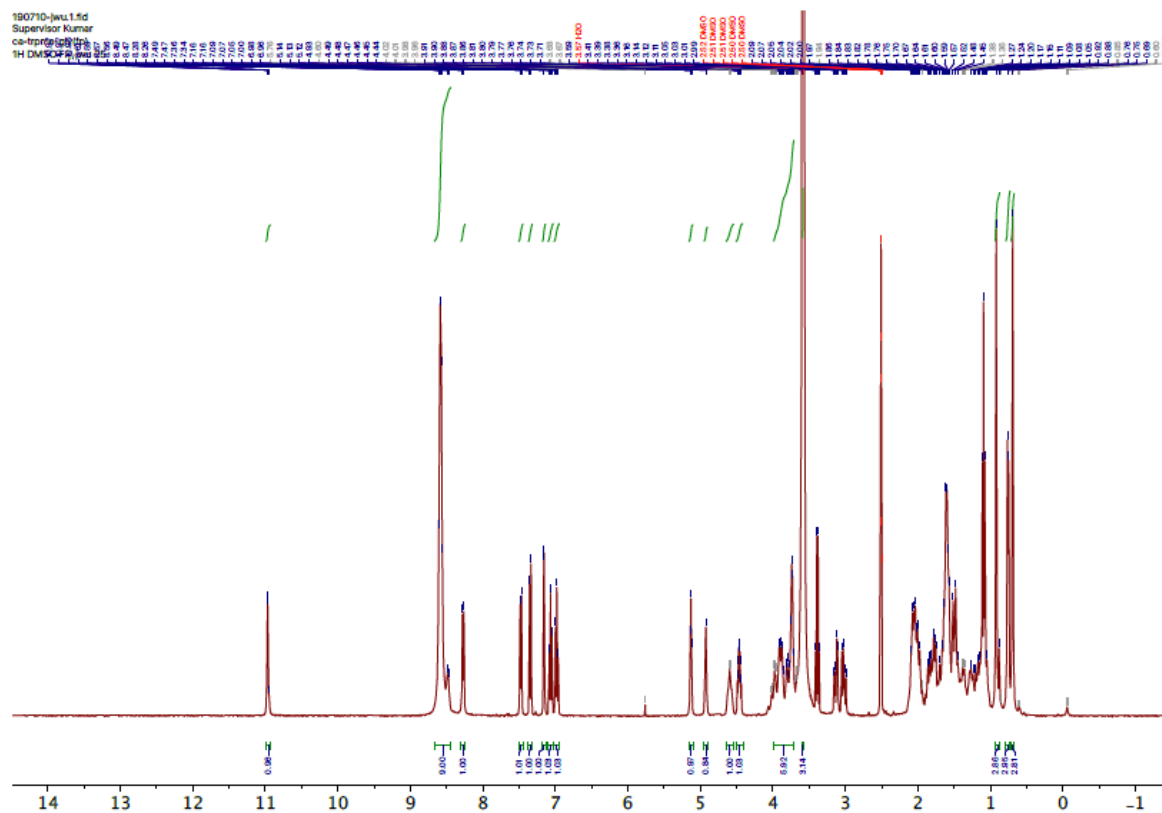

<sup>13</sup>C NMR (100 MHz, DMSO-*d*<sub>6</sub>):

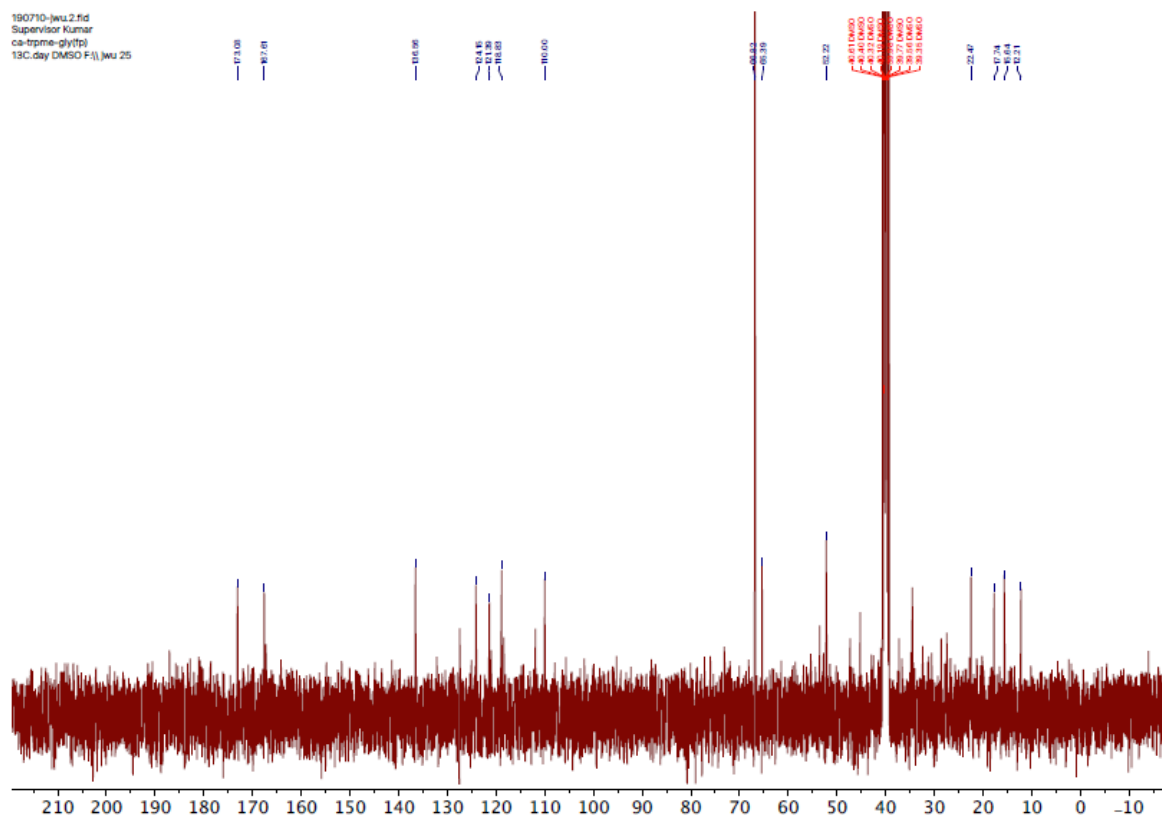

4,4',4''-(((3*R*,5*S*,7*R*,8*R*,9*S*,10*S*,12*S*,13*R*,14*S*,17*R*)-17-((*R*)-5-(((*S*)-3-(1*H*-Indol-3-yl)-1-methoxy-1-oxopropan-2-yl)amino)-5-oxopentan-2-yl)-10,13-dimethylhexadecahydro-1*H*-cyclopenta[*a*]phenanthrene-3,7,12-triyl)tris(oxy))tris(4-oxobutan-1-aminium) (**19b**)  
<sup>1</sup>H NMR (400 MHz, DMSO-*d*<sub>6</sub>):

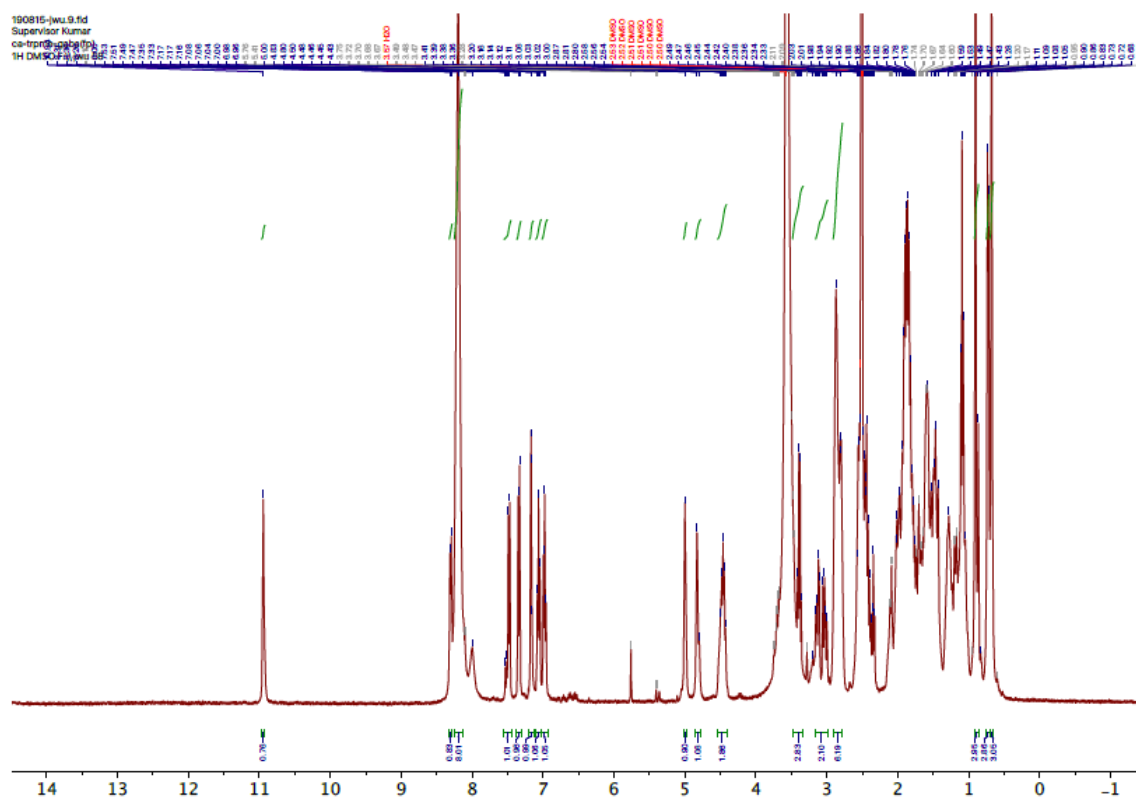

<sup>13</sup>C NMR (100 MHz, DMSO-*d*<sub>6</sub>):

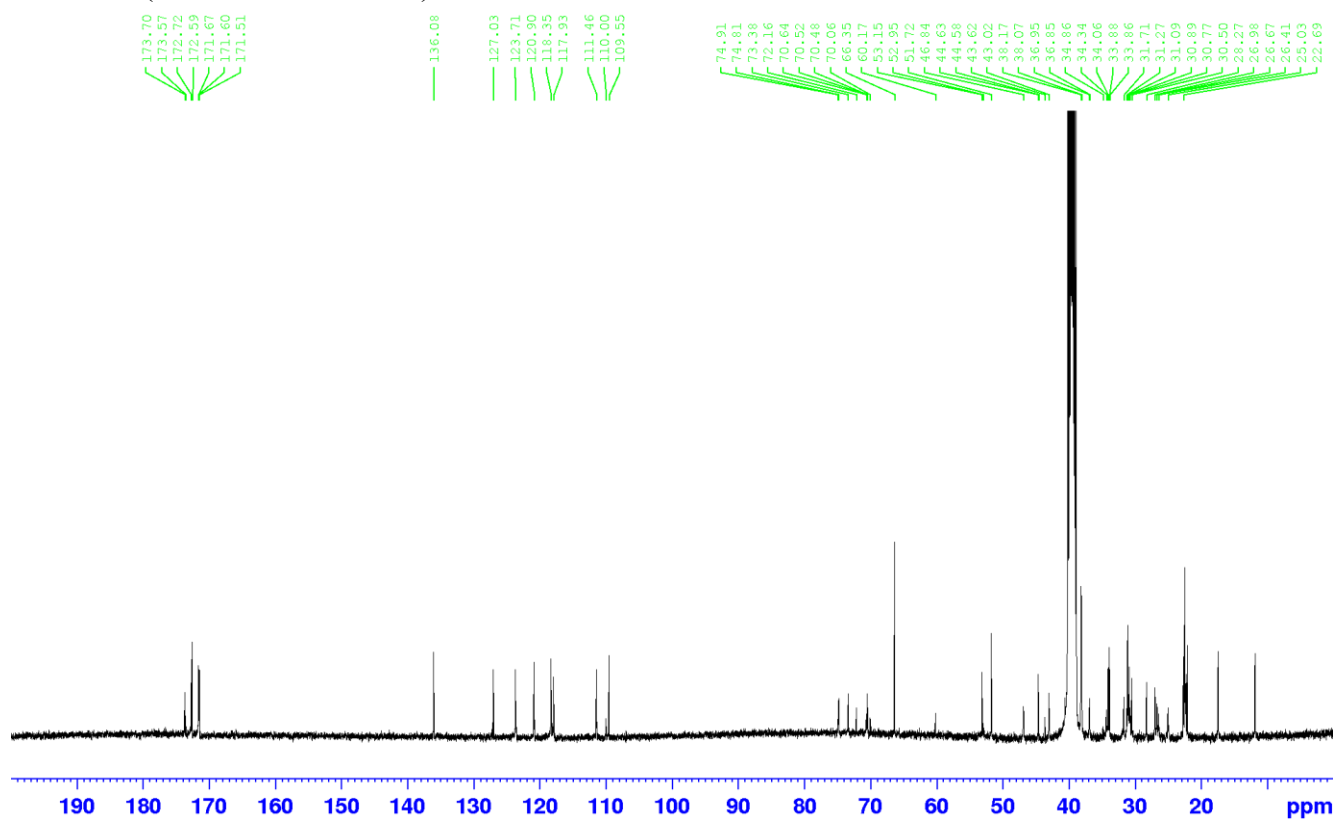



<sup>1</sup>H NMR (600 MHz, DMSO-*d*<sub>6</sub>):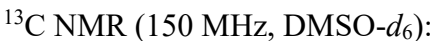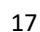

(5*S*,5'*S*,5''*S*)-6,6',6''-(((3*R*,5*S*,7*R*,8*R*,9*S*,10*S*,12*S*,13*R*,14*S*,17*R*)-17-((*R*)-5-(((*S*)-3-(1*H*-Indol-3-yl)-1-methoxy-1-oxopropan-2-yl)amino)-5-oxopentan-2-yl)-10,13-dimethylhexadecahydro-1*H*-cyclopenta[*a*]phenanthrene-3,7,12-triyl)tris(oxy))tris(6-oxohexane-1,5-diaminium) (**19d**)  
<sup>1</sup>H NMR (600 MHz, DMSO-*d*<sub>6</sub>):

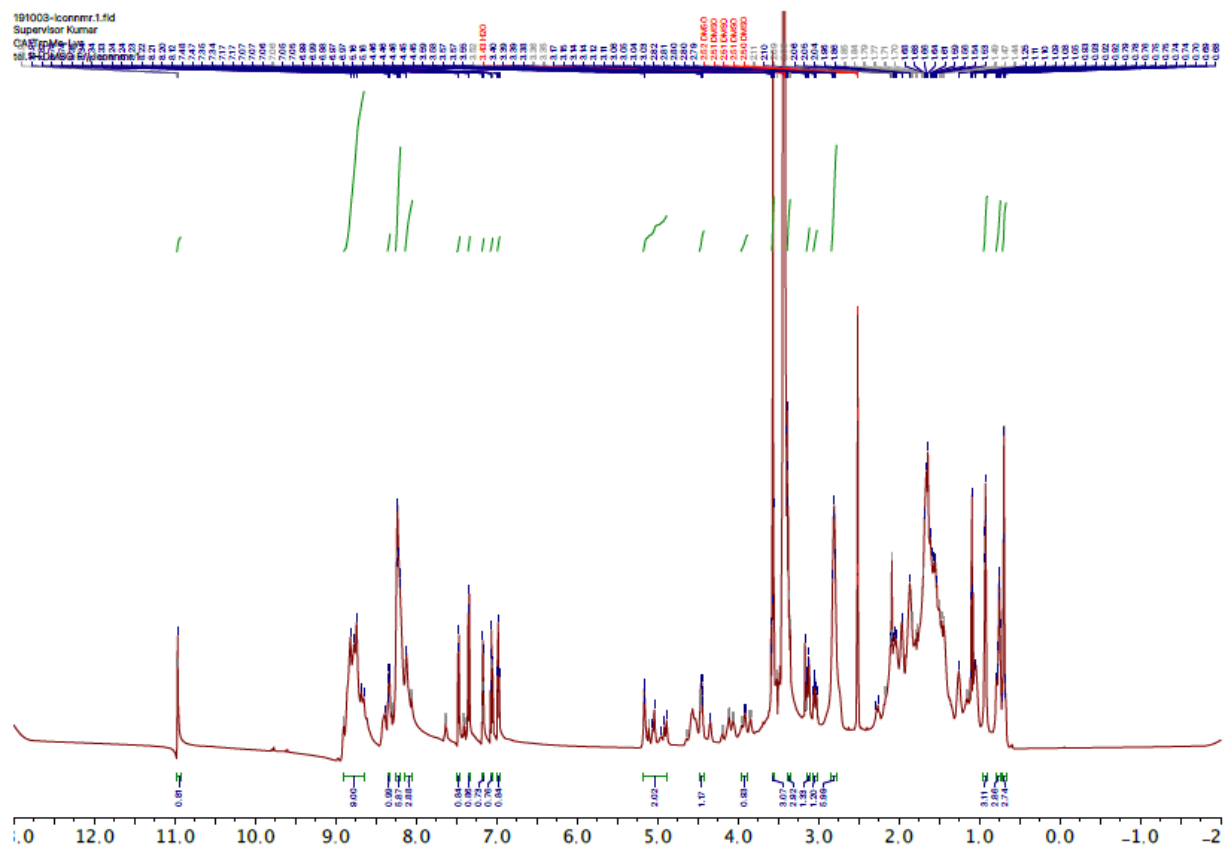

<sup>13</sup>C NMR (150 MHz, DMSO-*d*<sub>6</sub>):

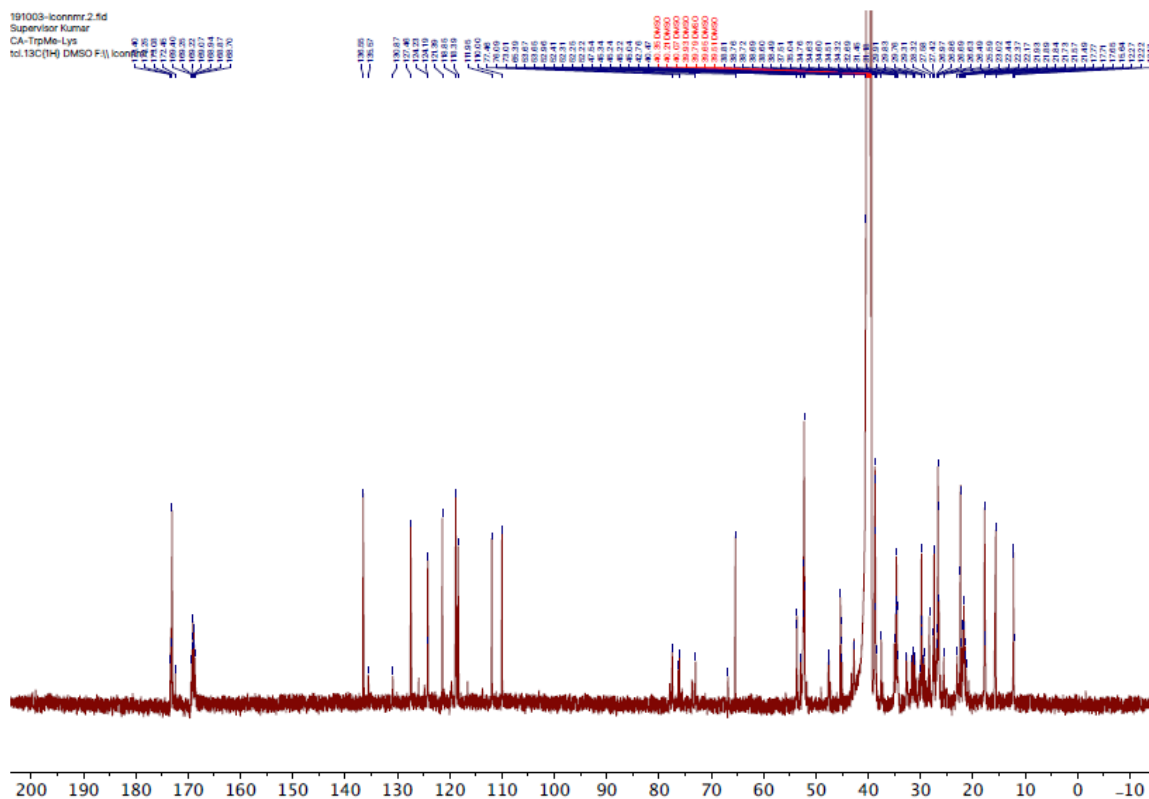

<sup>1</sup>H NMR (400 MHz, DMSO-*d*<sub>6</sub>):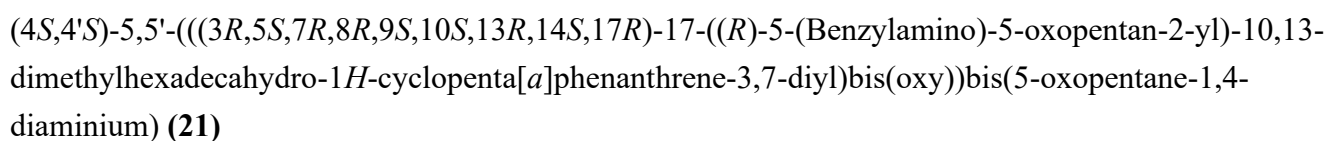<sup>1</sup>H NMR (400 MHz, DMSO-*d*<sub>6</sub>):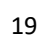

<sup>1</sup>H NMR (400 MHz, DMSO-*d*<sub>6</sub>):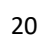

<sup>1</sup>H NMR (400 MHz, DMSO-*d*<sub>6</sub>):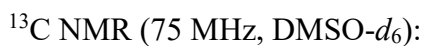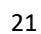

<sup>1</sup>H NMR (600 MHz, DMSO-*d*<sub>6</sub>):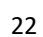

# High resolution mass spectra (HRMS) of synthesised compounds

2-(((3*R*,5*R*,8*R*,9*S*,10*S*,13*R*,14*S*,17*R*)-17-((*R*)-5-(((*S*)-3-(1*H*-Indol-3-yl)-1-methoxy-1-oxopropan-2-yl)amino)-5-oxopentan-2-yl)-10,13-dimethylhexadecahydro-1*H*-cyclopenta[*a*]phenanthren-3-yl)oxy)-2-oxoethan-1-aminium (**16a**)

## Full spectrum

jwu-LICA-Gly\_Pos\_Full\_b #2-34 RT: 0.04-0.98 AV: 33 NL: 4.92E7  
T: FTMS + p NSI sid=55.00 Full ms [100.00-2000.00]

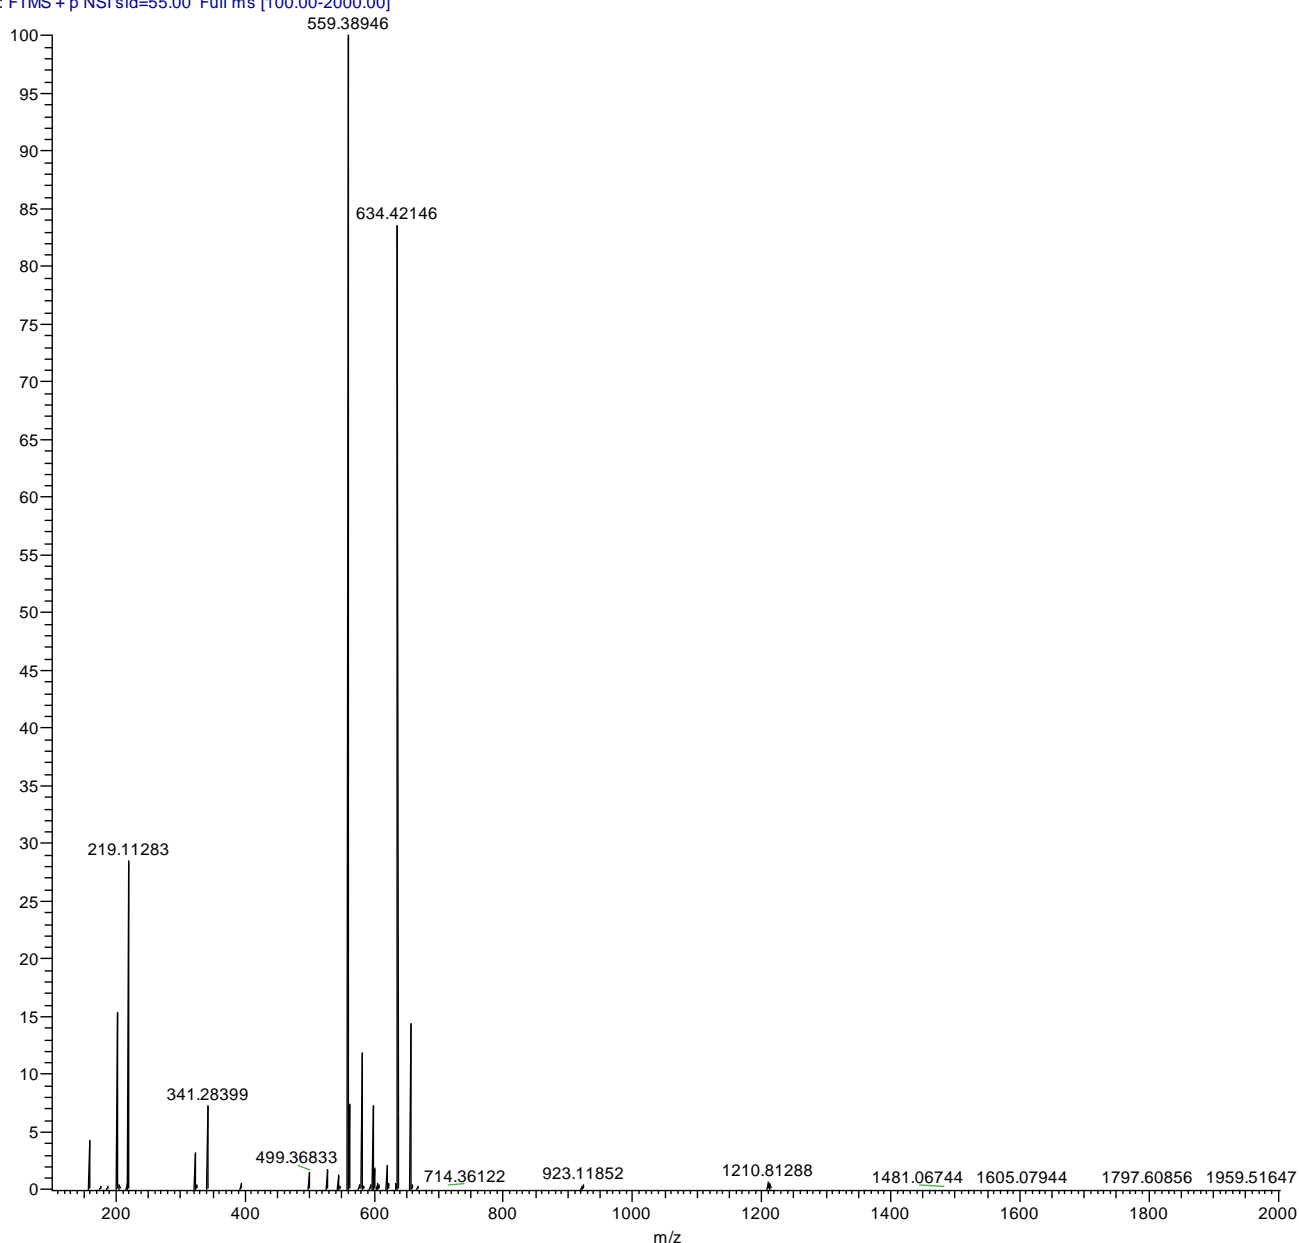

Zoomed spectrum (Top spectrum: measured mass; bottom spectrum: calculated mass)

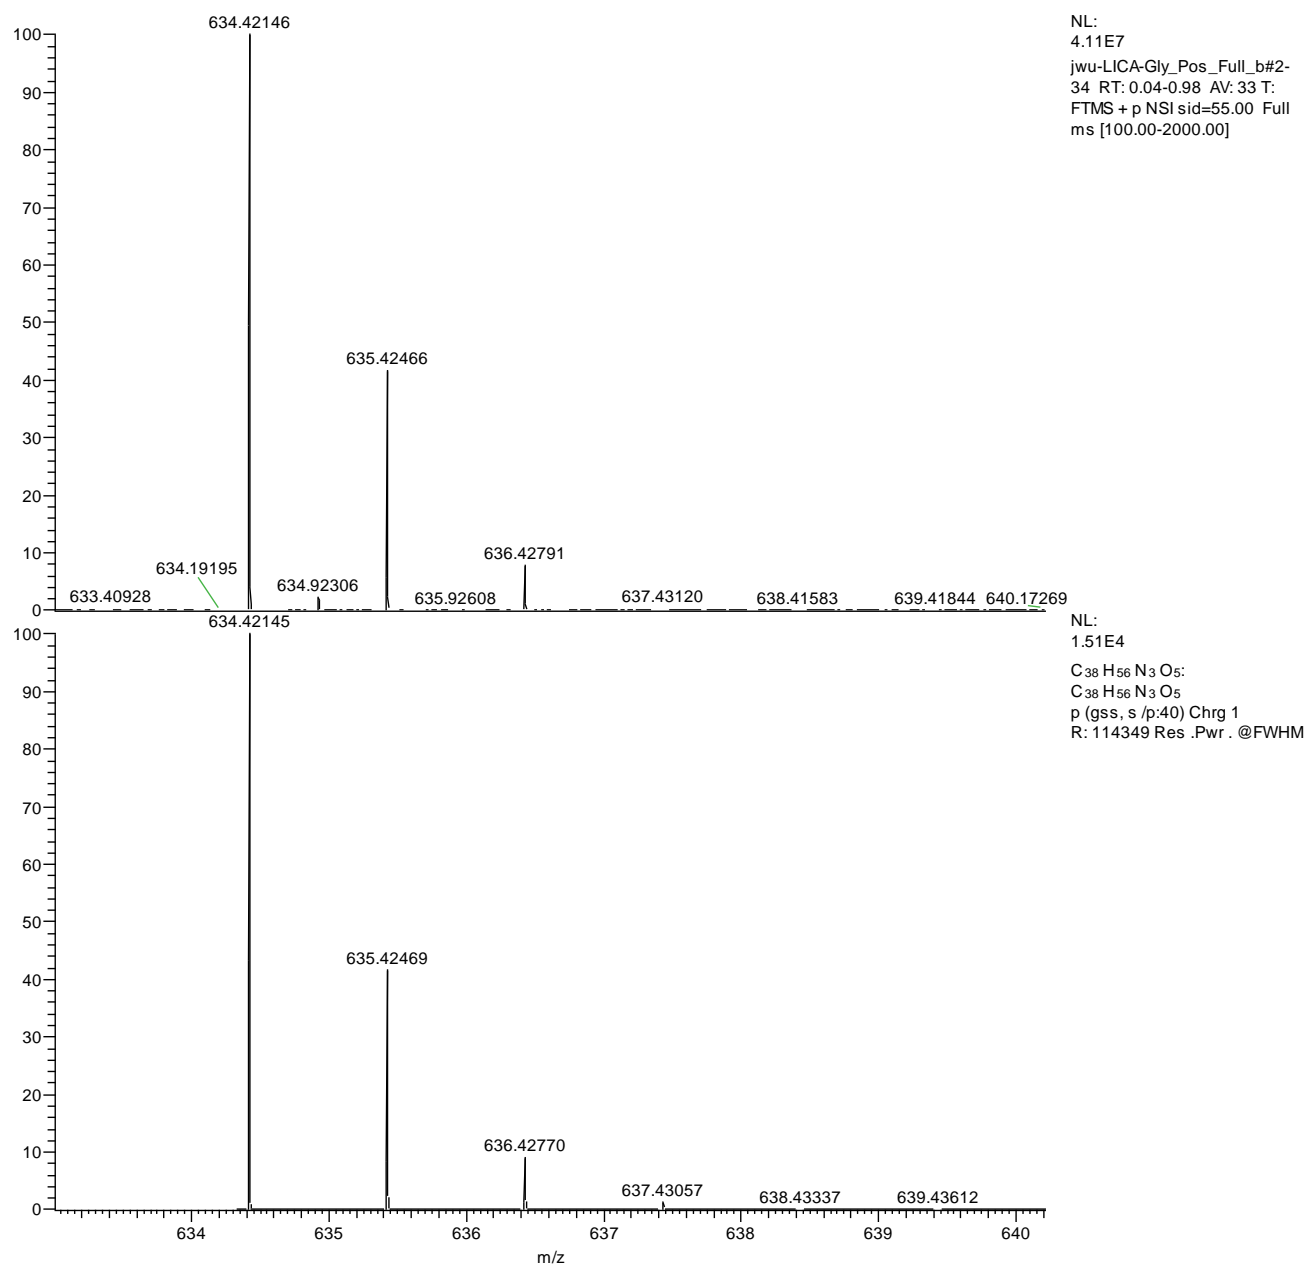



4-(((3*R*,5*R*,8*R*,9*S*,10*S*,13*R*,14*S*,17*R*)-17-((*R*)-5-(((*S*)-3-(1*H*-Indol-3-yl)-1-methoxy-1-oxopropan-2-yl)amino)-5-oxopentan-2-yl)-10,13-dimethylhexadecahydro-1*H*-cyclopenta[*a*]phenanthren-3-yl)oxy)-4-oxobutan-1-aminium (**16b**)

## Full spectrum

jwu-LICA-Gaba\_Pos\_Full #2-22 RT: 0.03-0.59 AV: 21 NL: 1.04E8

T: FTMS + p NSI sid=55.00 Full ms [100.00-2000.00]

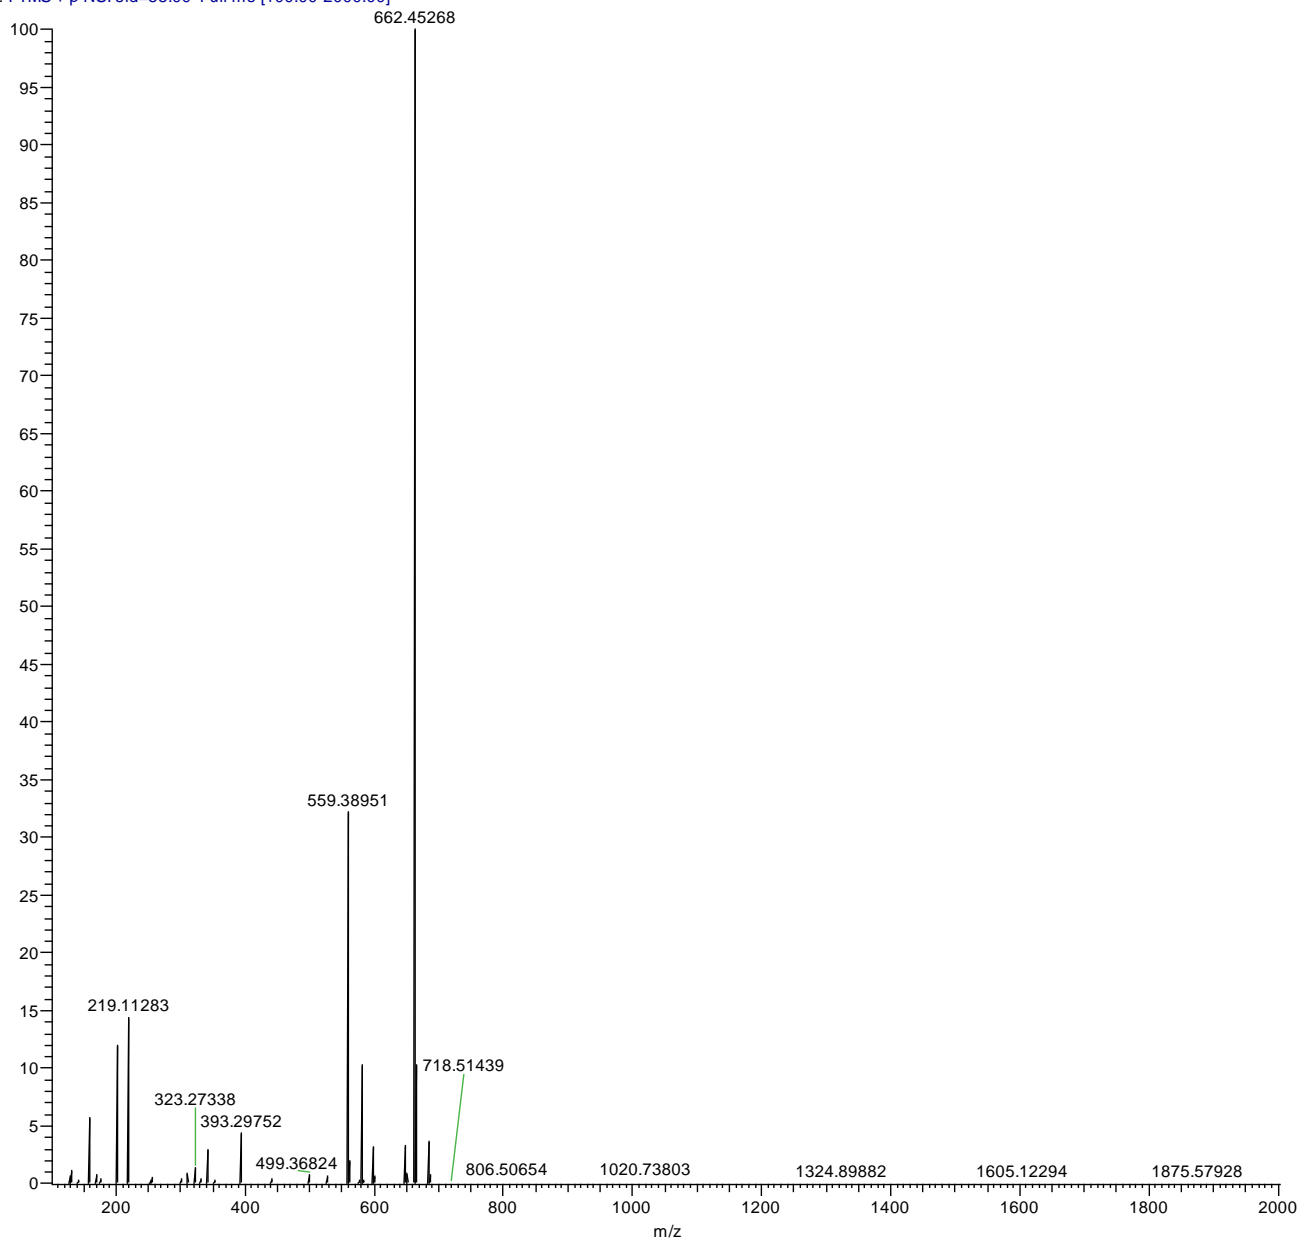

Zoomed spectrum (Top spectrum: measured mass; bottom spectrum: calculated mass)

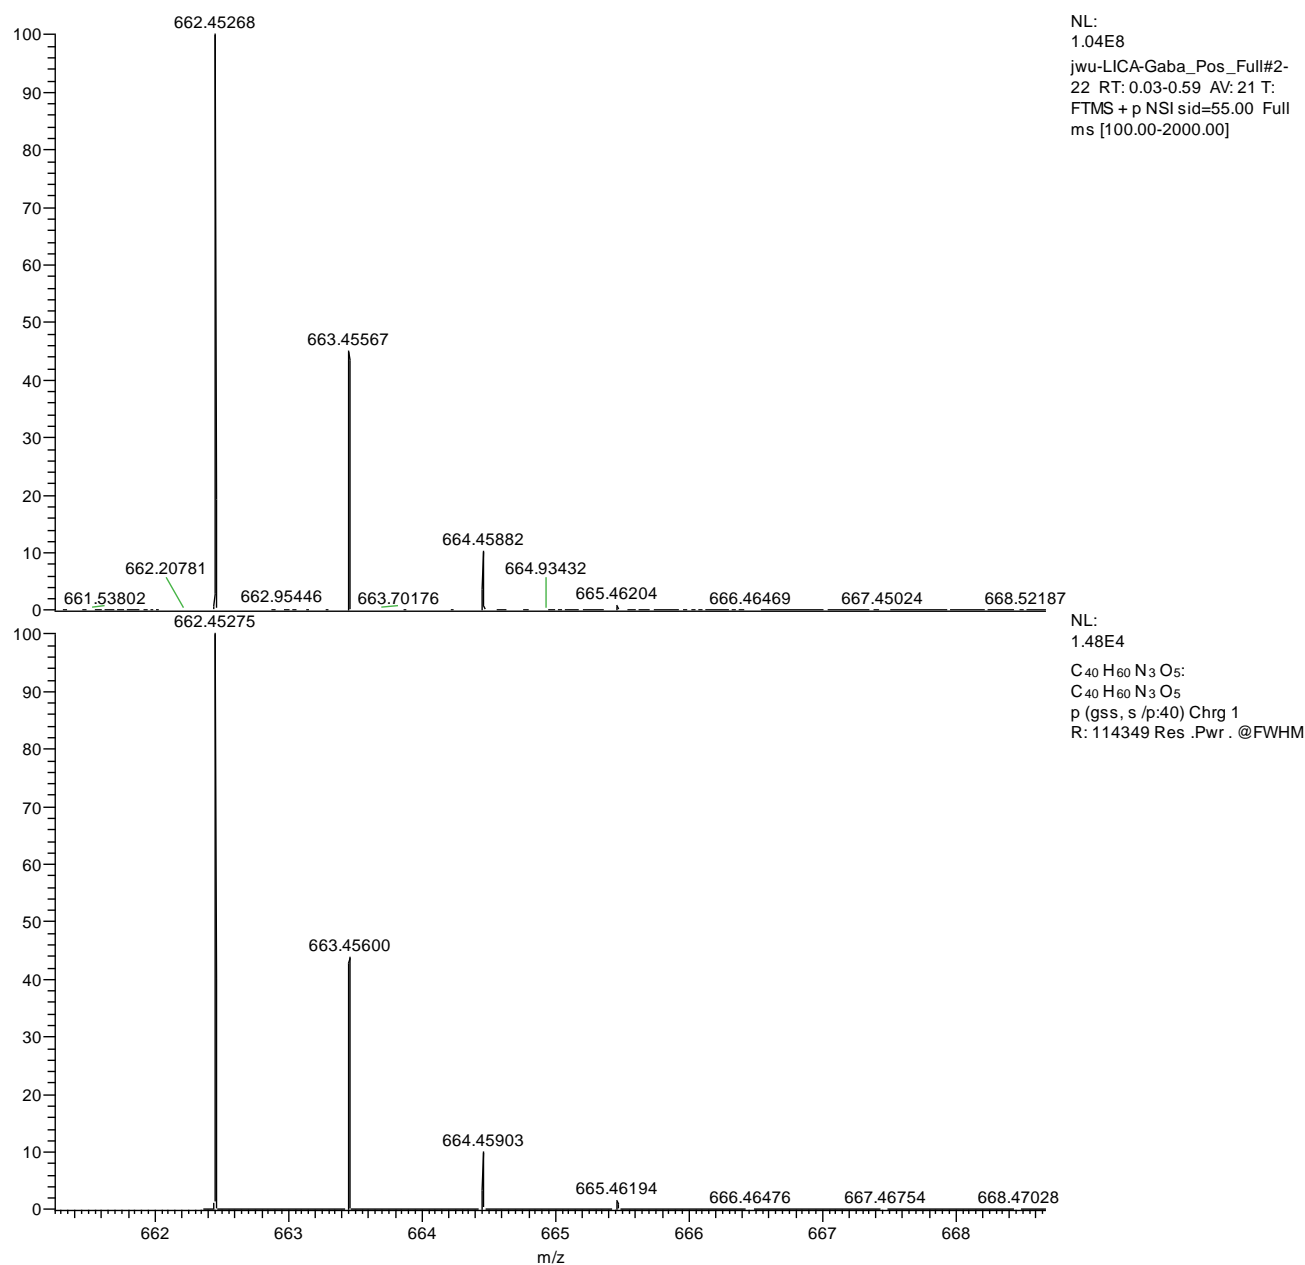

(*S*)-5-(((3*R*,5*R*,8*R*,9*S*,10*S*,13*R*,14*S*,17*R*)-17-((*R*)-5-(((*S*)-3-(1*H*-Indol-3-yl)-1-methoxy-1-oxopropan-2-yl)amino)-5-oxopentan-2-yl)-10,13-dimethylhexadecahydro-1*H*-cyclopenta[*a*]phenanthren-3-yl)oxy)-5-oxopentane-1,4-diaminium (**16c**)

## Full spectrum

jwu-LICA-Orn\_Pos\_Full #5-56 RT: 0.12-1.57 AV: 52 NL: 6.35E7

T: FTMS + p NSI Full ms [100.00-2000.00]

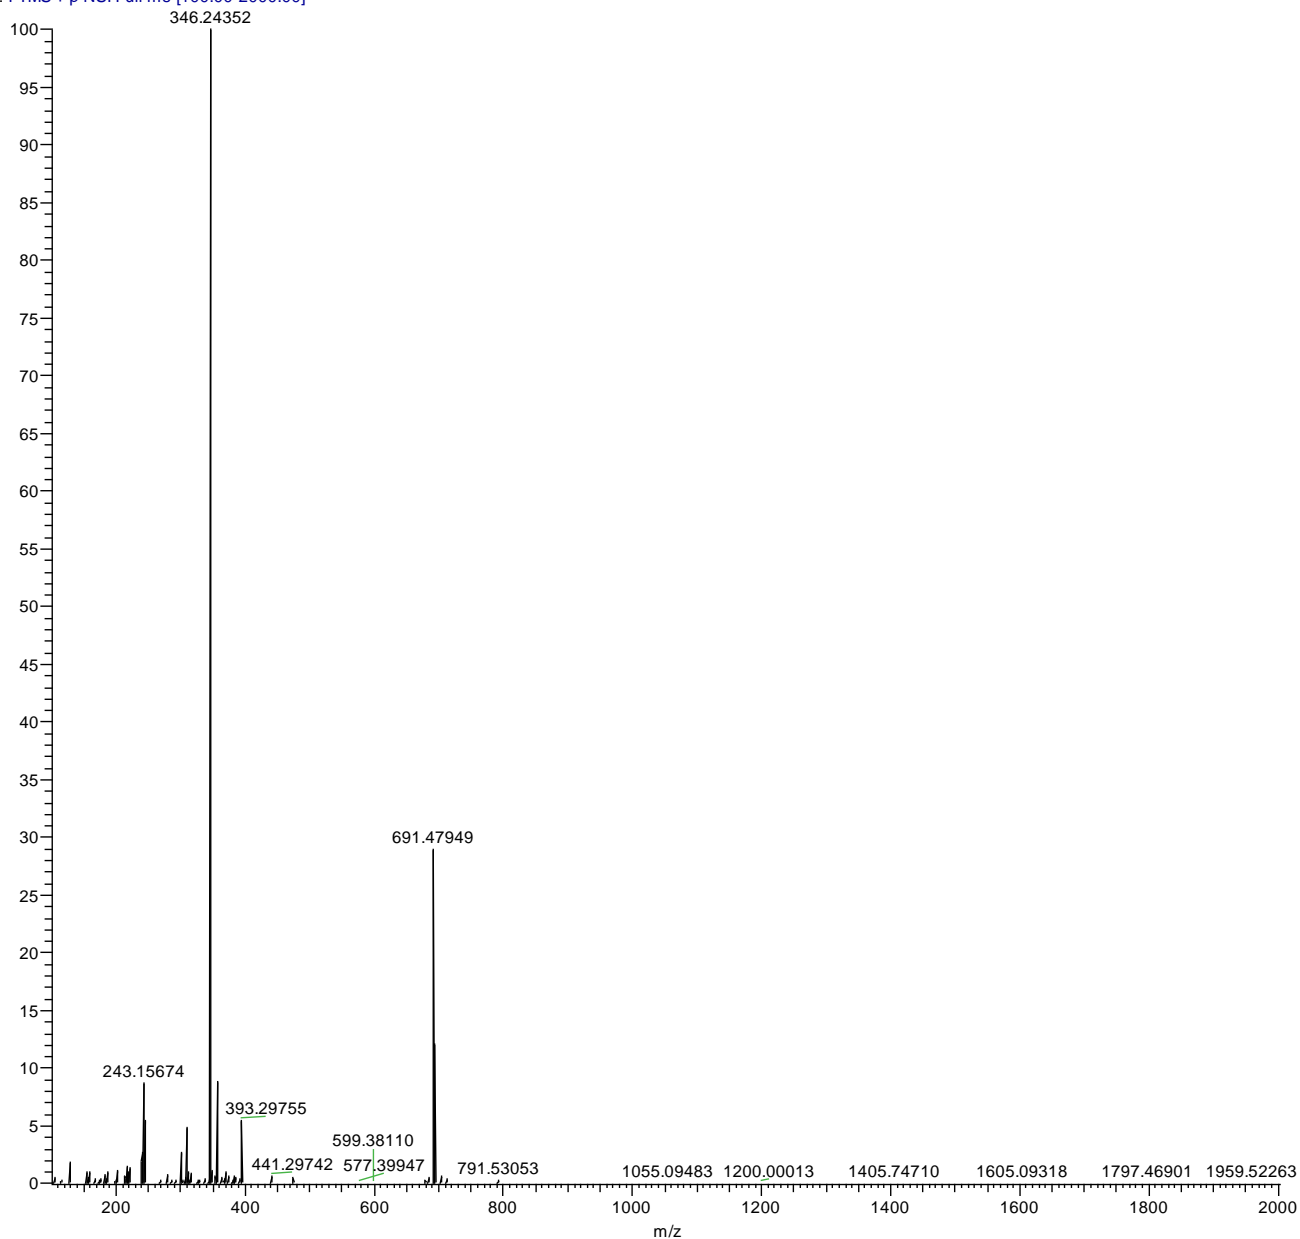

Zoomed spectrum (Top spectrum: measured mass; bottom spectrum: calculated mass)

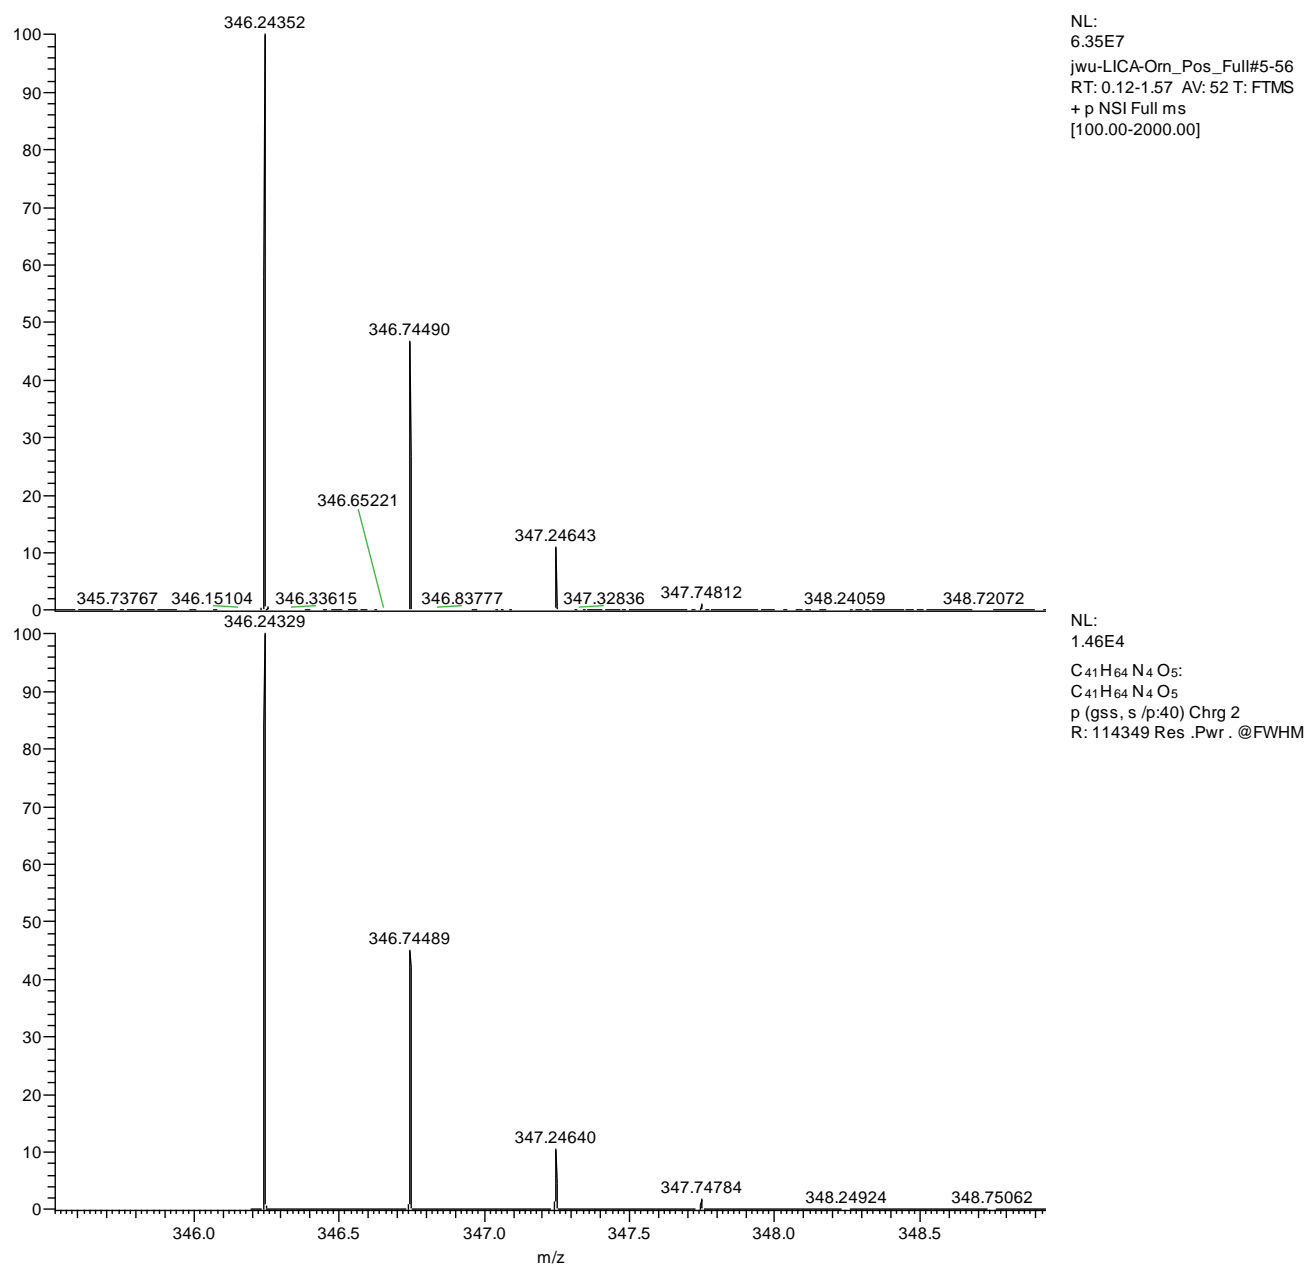

(*S*)-6-(((3*R*,5*R*,8*R*,9*S*,10*S*,13*R*,14*S*,17*R*)-17-((*R*)-5-(((*S*)-3-(1*H*-Indol-3-yl)-1-methoxy-1-oxopropan-2-yl)amino)-5-oxopentan-2-yl)-10,13-dimethylhexadecahydro-1*H*-cyclopenta[*a*]phenanthren-3-yl)oxy)-6-oxohexane-1,5-diaminium (**16d**)

## Full spectrum

jwu-LICA-Lys\_Pos\_Full #1-21 RT: 0.01-0.59 AV: 21 NL: 2.08E8

T: FTMS + p NSI Full ms [100.00-2000.00]

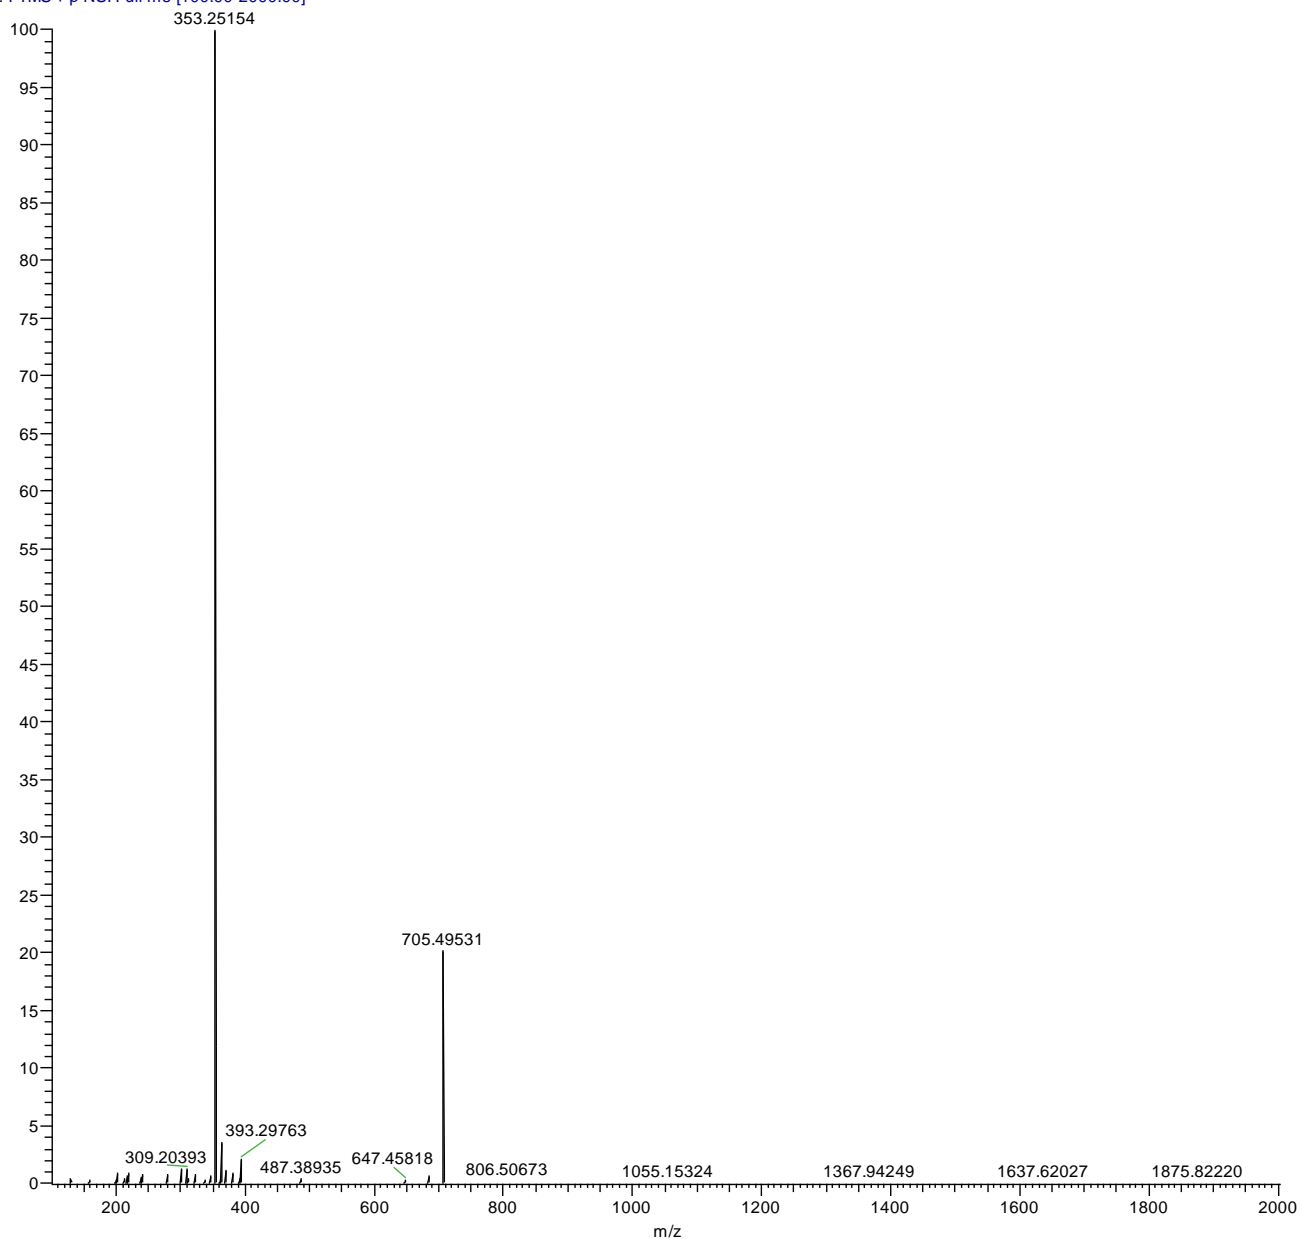

Zoomed spectrum (Top spectrum: measured mass; bottom spectrum: calculated mass)

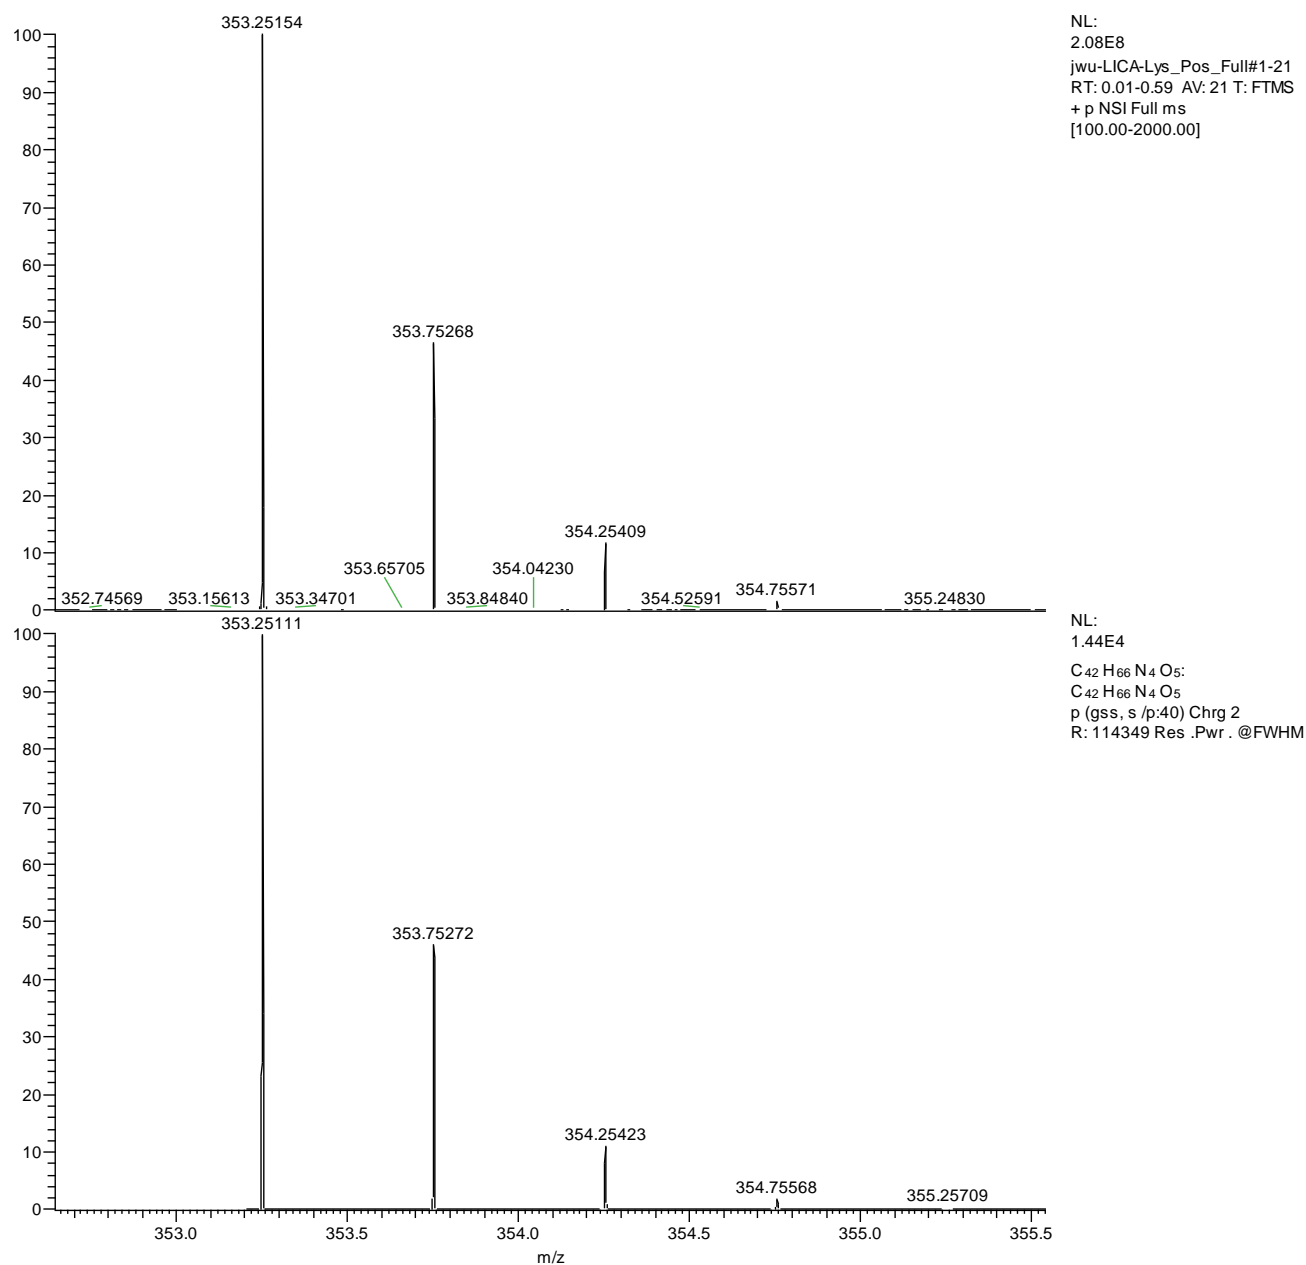

2,2'-(((3*R*,5*S*,7*R*,8*R*,9*S*,10*S*,13*R*,14*S*,17*R*)-17-((*R*)-5-(((*S*)-3-(1*H*-Indol-3-yl)-1-methoxy-1-oxopropan-2-yl)amino)-5-oxopentan-2-yl)-10,13-dimethylhexadecahydro-1*H*-cyclopenta[*a*]phenanthrene-3,7-diyl)bis(oxy))bis(2-oxoethan-1-aminium) (**17a**)

Full spectrum

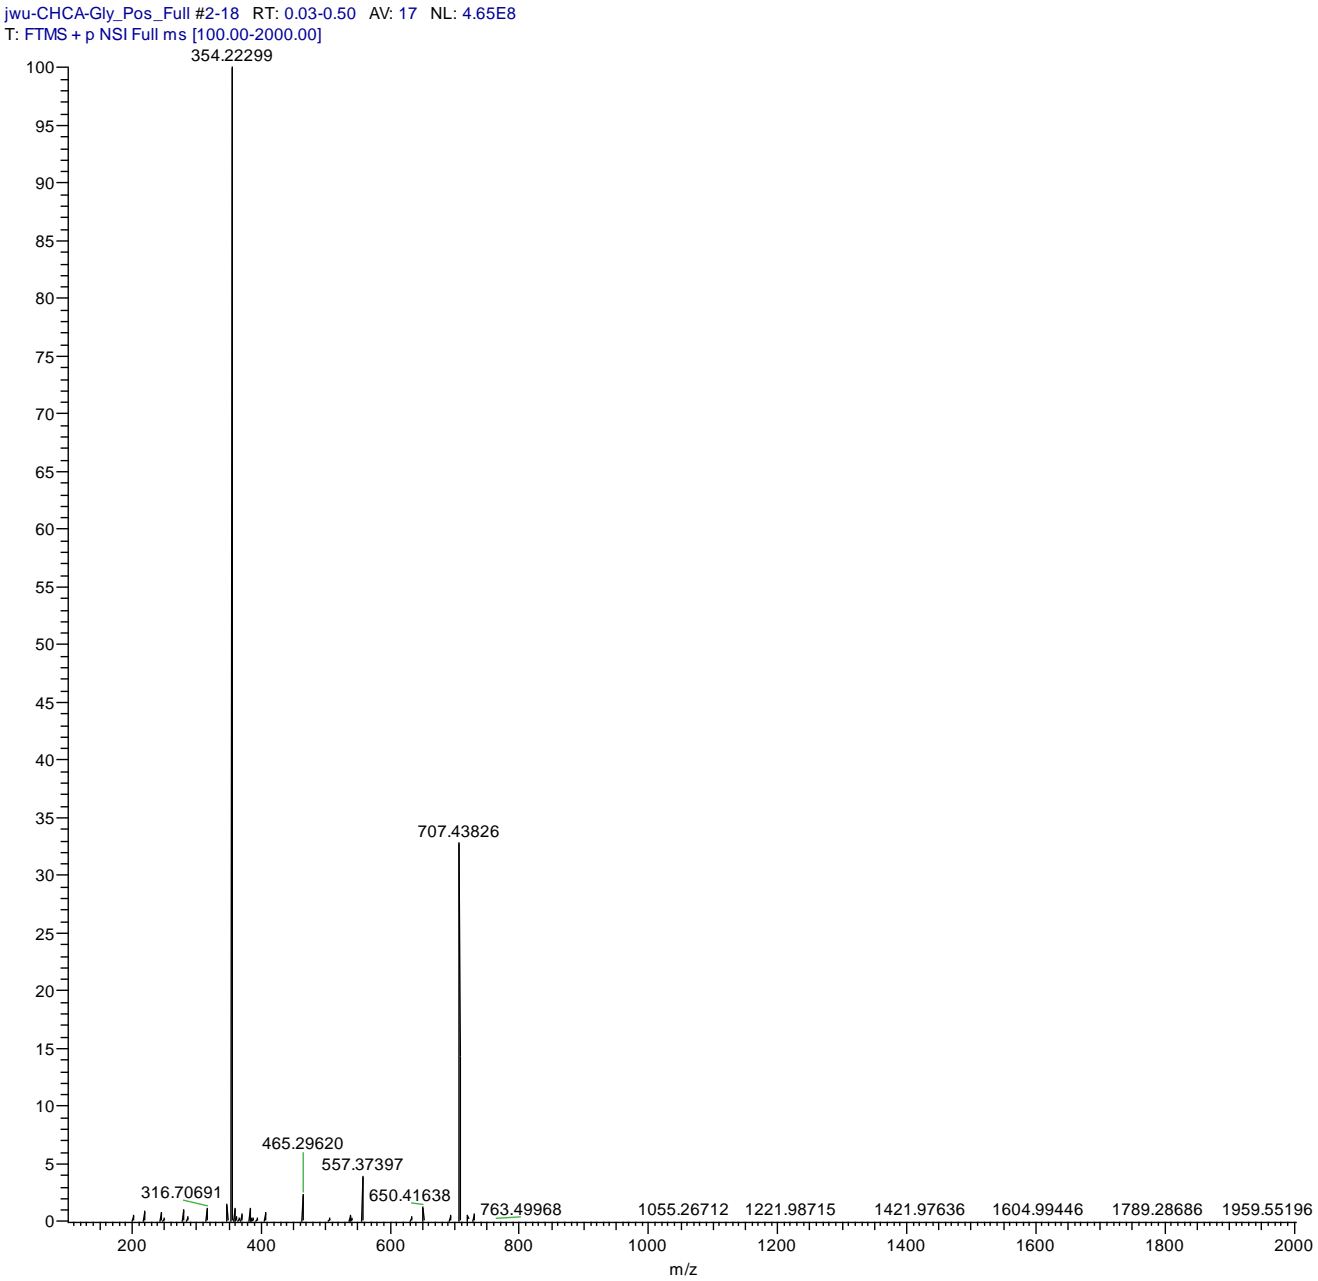

Zoomed spectrum (Top spectrum: measured mass; bottom spectrum: calculated mass)

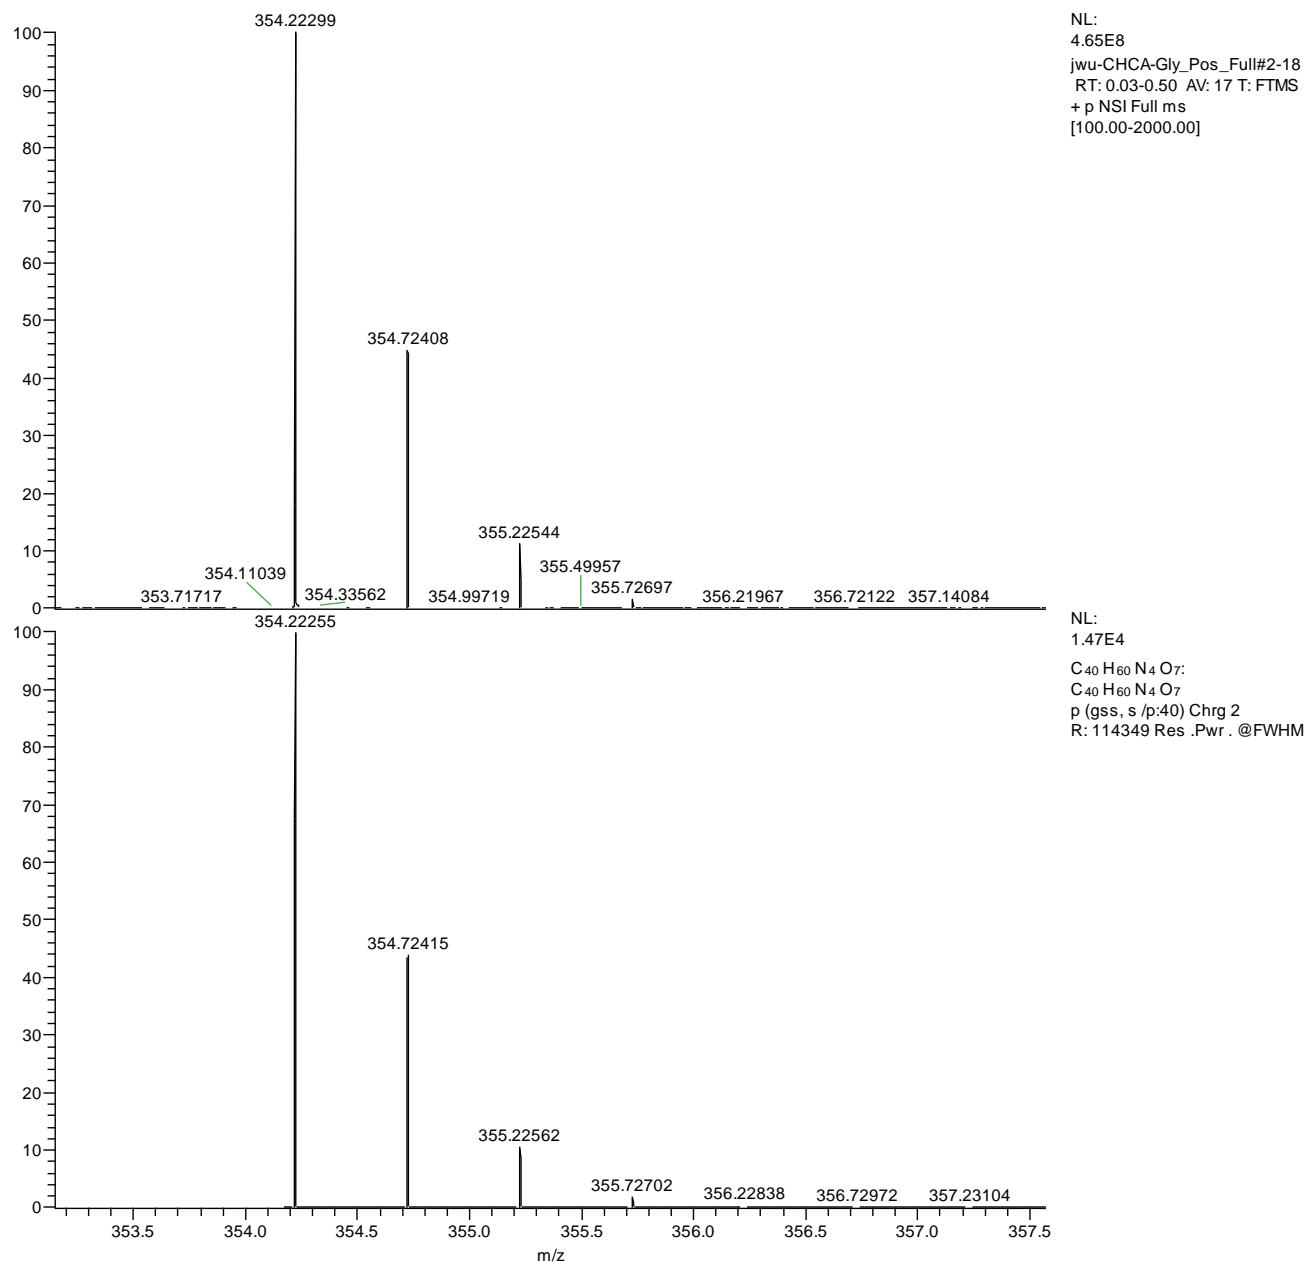



4,4'-(((3*R*,5*S*,7*R*,8*R*,9*S*,10*S*,13*R*,14*S*,17*R*)-17-((*R*)-5-(((*S*)-3-(1*H*-Indol-3-yl)-1-methoxy-1-oxopropan-2-yl)amino)-5-oxopentan-2-yl)-10,13-dimethylhexadecahydro-1*H*-cyclopenta[*a*]phenanthrene-3,7-diyl)bis(oxy))bis(4-oxobutan-1-aminium) (**17b**)

Full spectrum

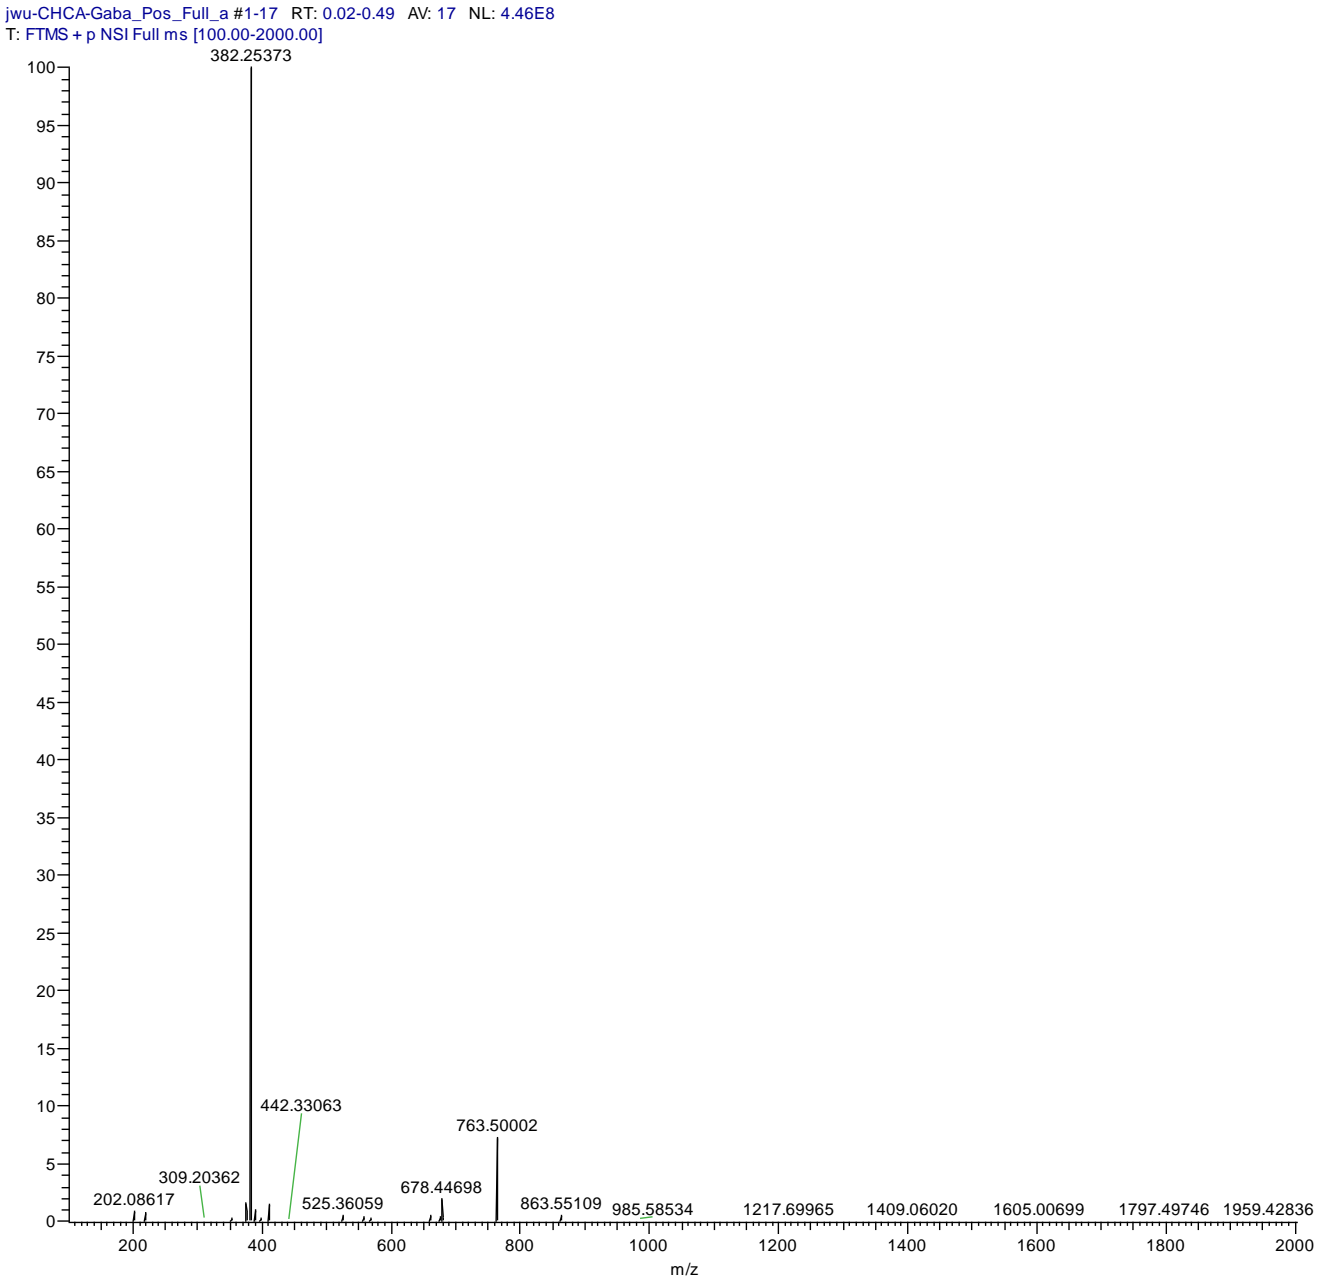

Zoomed spectrum (Top spectrum: measured mass; bottom spectrum: calculated mass)

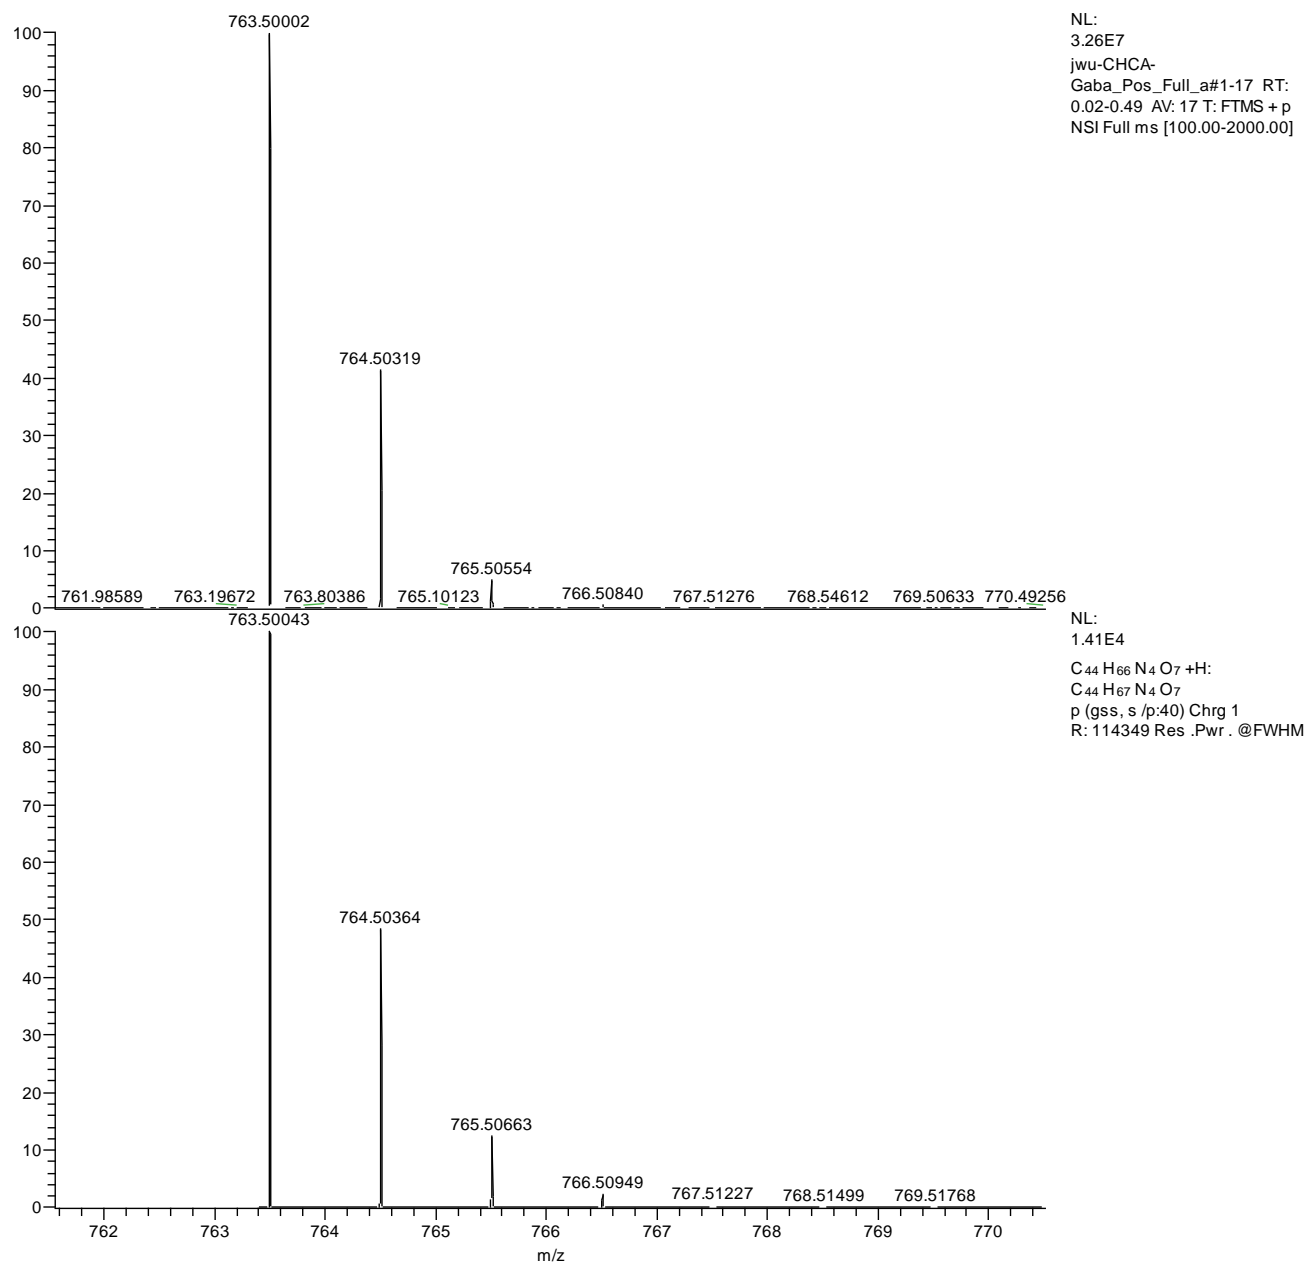

(4*S*,4'*S*)-5,5'-(((3*R*,5*S*,7*R*,8*R*,9*S*,10*S*,13*R*,14*S*,17*R*)-17-((*R*)-5-(((*S*)-3-(1*H*-Indol-3-yl)-1-methoxy-1-oxopropan-2-yl)amino)-5-oxopentan-2-yl)-10,13-dimethylhexadecahydro-1*H*-cyclopenta[*a*]phenanthrene-3,7-diyl)bis(oxy))bis(5-oxopentane-1,4-diaminium) (**17c**)

## Full spectrum

jwu-CHCA-Orn\_Pos\_Full #5-44 RT: 0.14-1.28 AV: 40 NL: 3.97E8

T: FTMS + p NSI Full ms [100.00-2000.00]

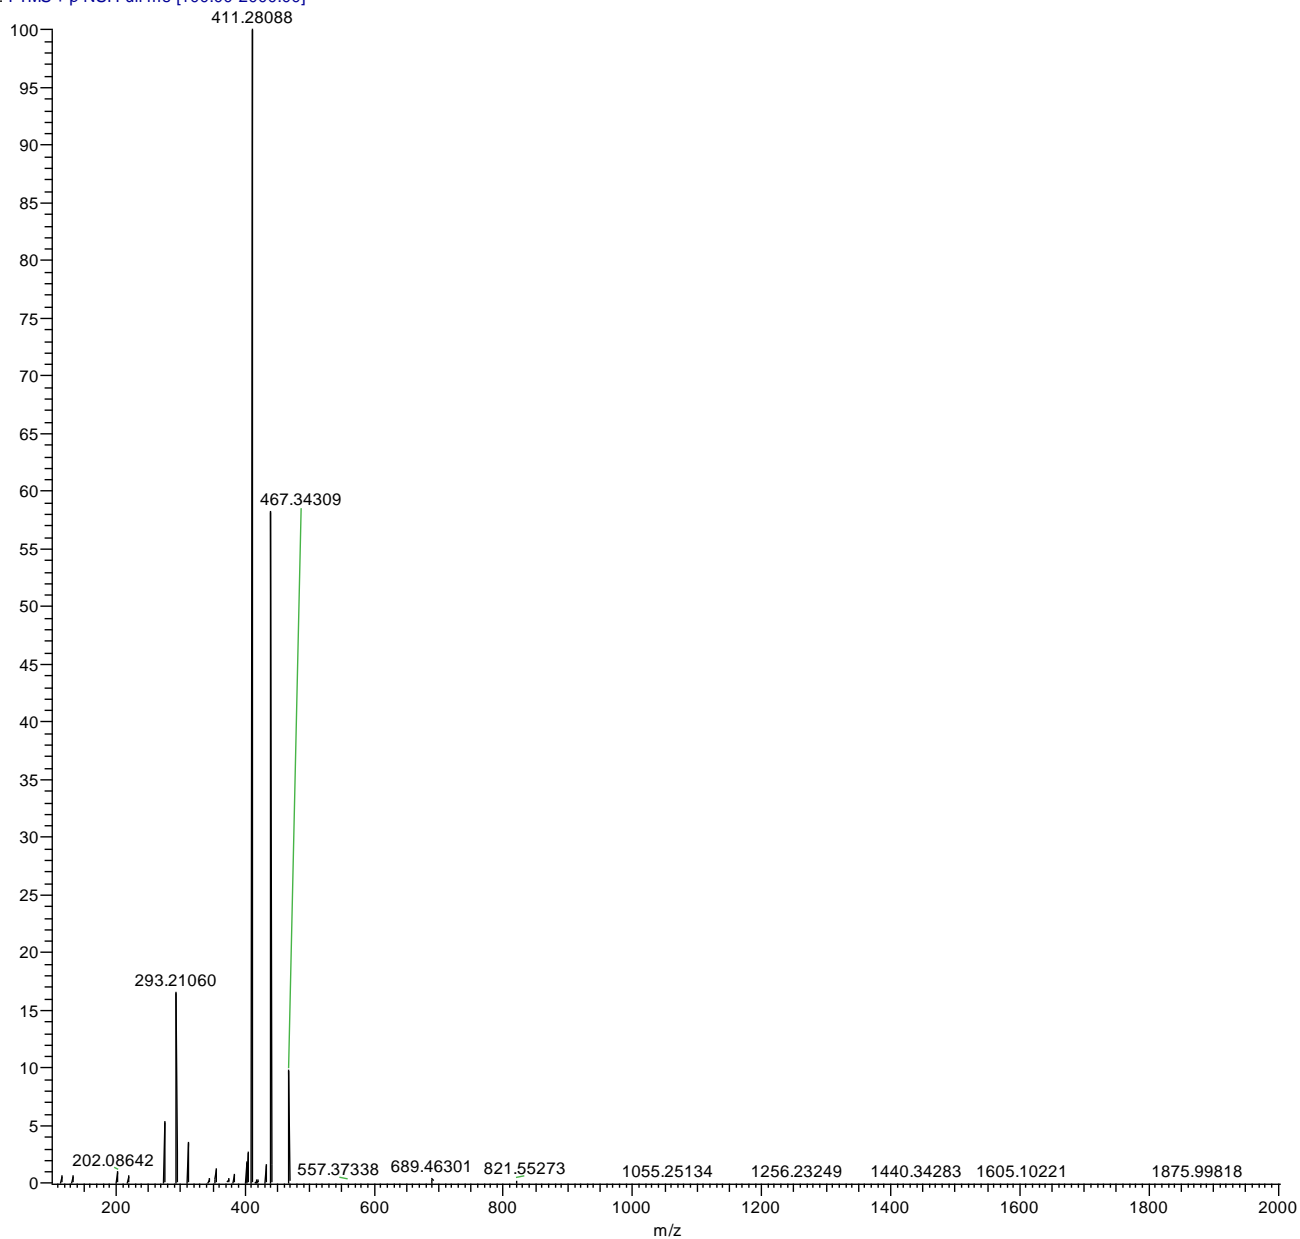

Zoomed spectrum (Top spectrum: measured mass; bottom spectrum: calculated mass)

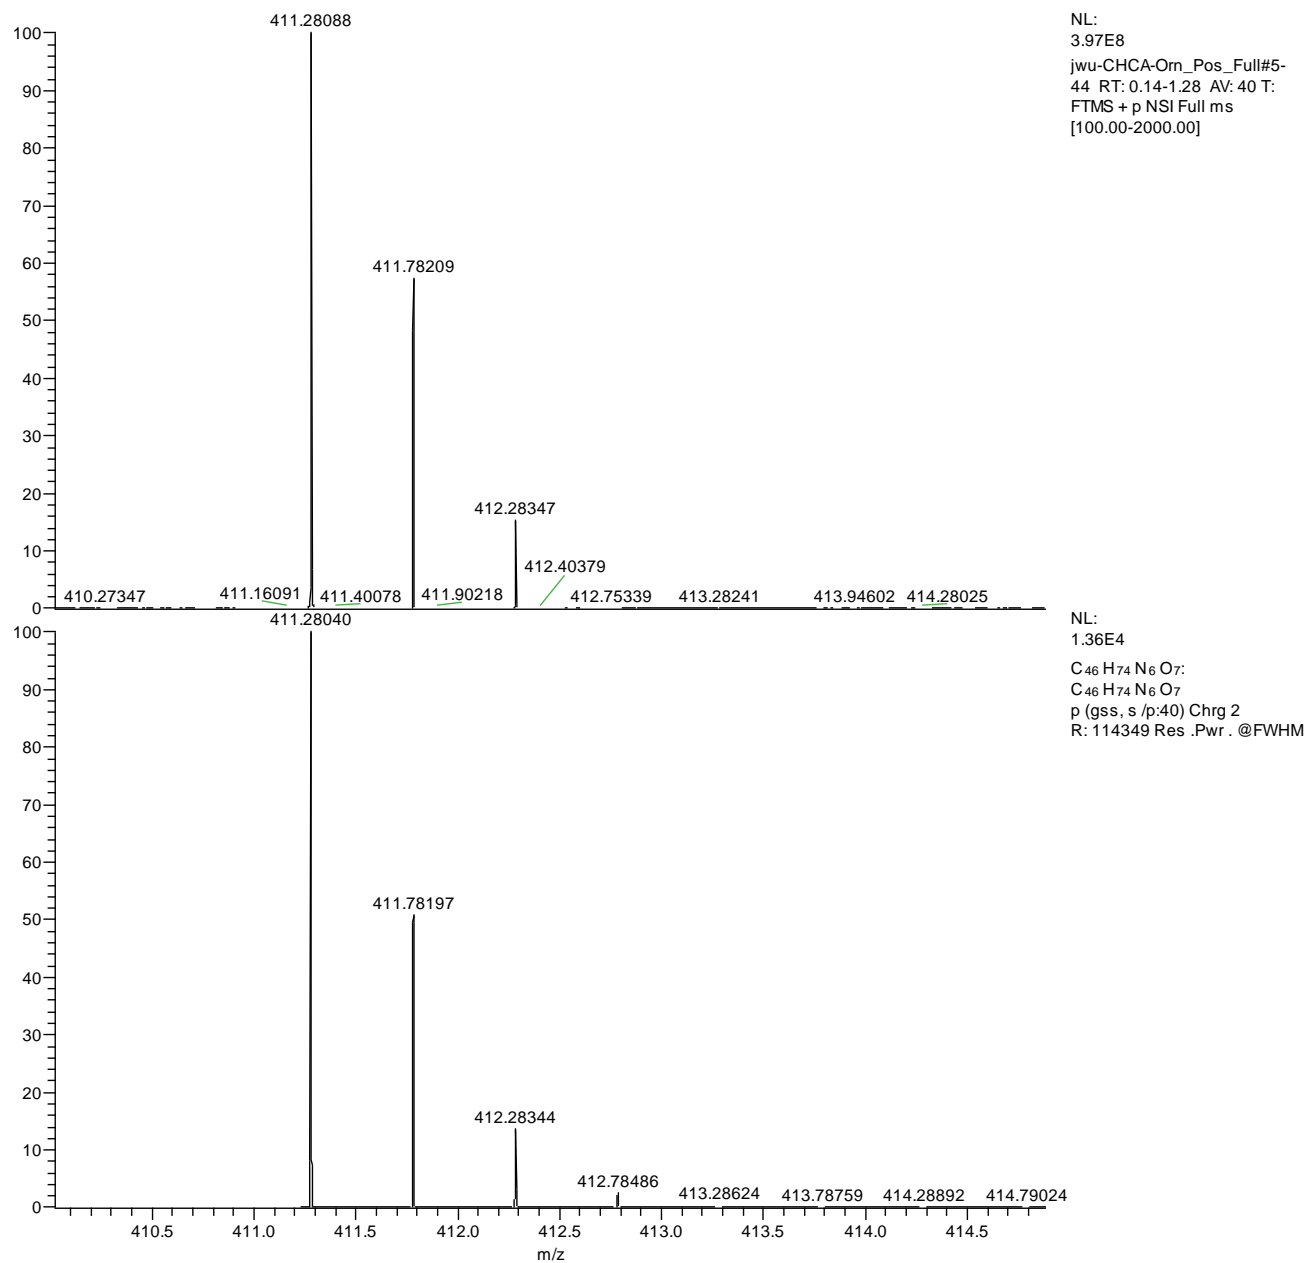

(5*S*,5'*S*)-6,6'-(((3*R*,5*S*,7*R*,8*R*,9*S*,10*S*,13*R*,14*S*,17*R*)-17-((*R*)-5-(((*S*)-3-(1*H*-Indol-3-yl)-1-methoxy-1-oxopropan-2-yl)amino)-5-oxopentan-2-yl)-10,13-dimethylhexadecahydro-1*H*-cyclopenta[*a*]phenanthrene-3,7-diyl)bis(oxy))bis(6-oxohexane-1,5-diaminium) (**17d**)

## Full spectrum

jwu-CHCA-Lys\_Pos\_Full #1-21 RT: 0.02-0.60 AV: 21 NL: 5.68E8  
T: FTMS + p NSI Full ms [100.00-2000.00]

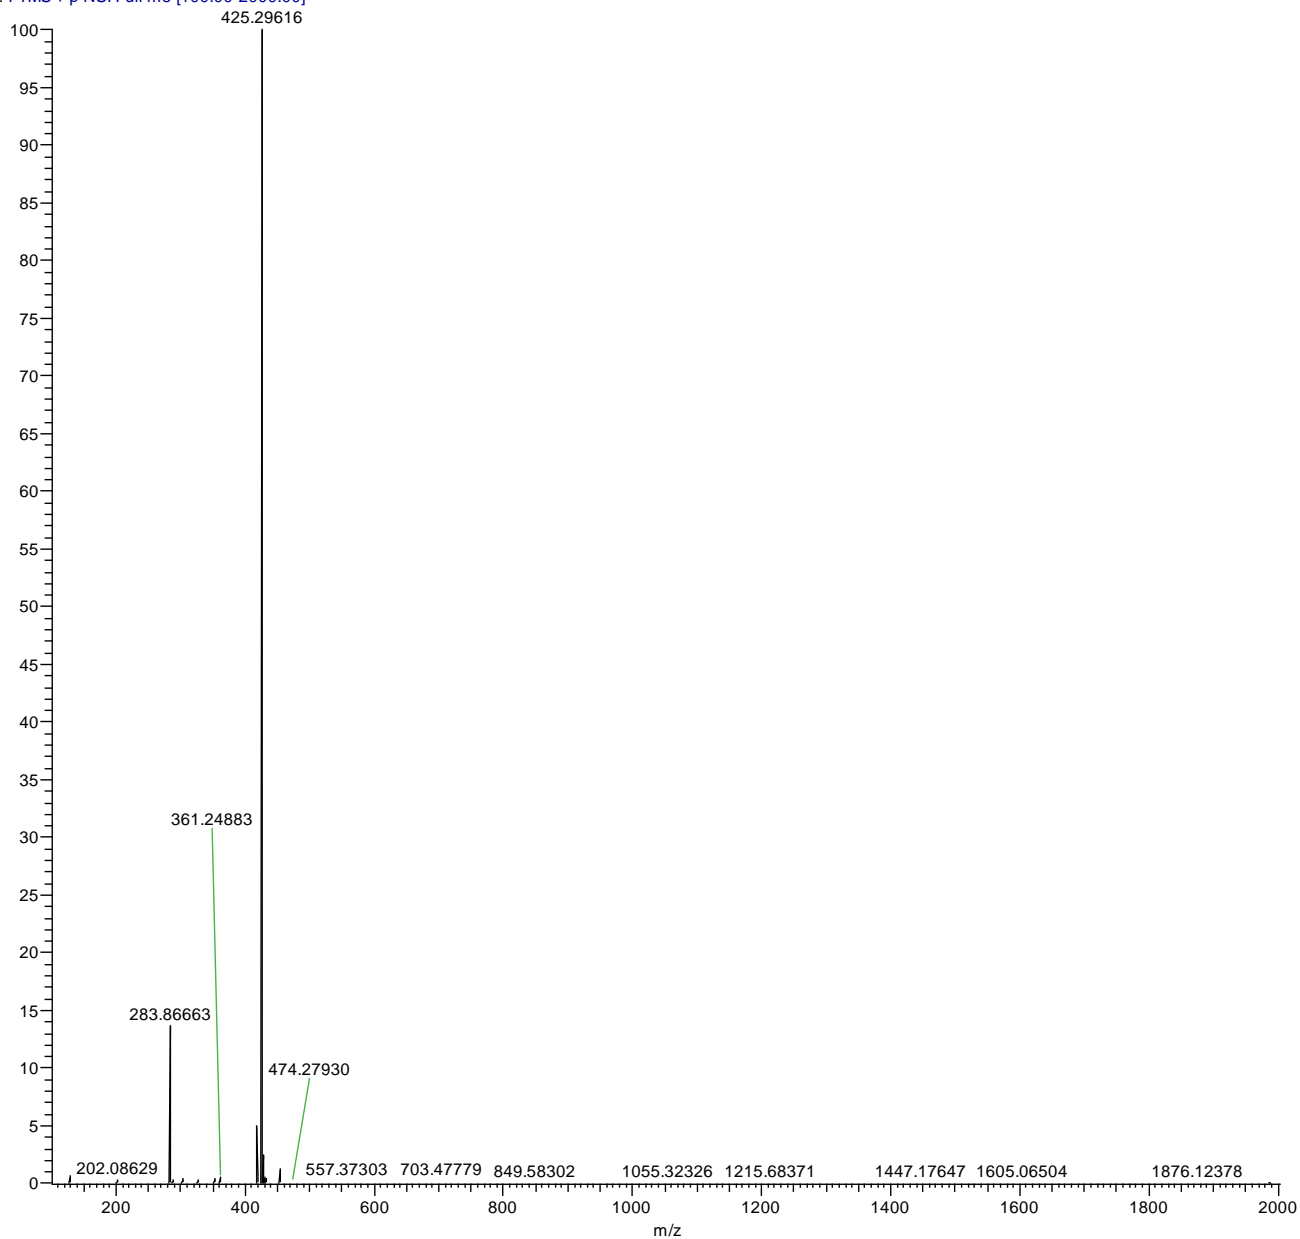

Zoomed spectrum (Top spectrum: measured mass; bottom spectrum: calculated mass)

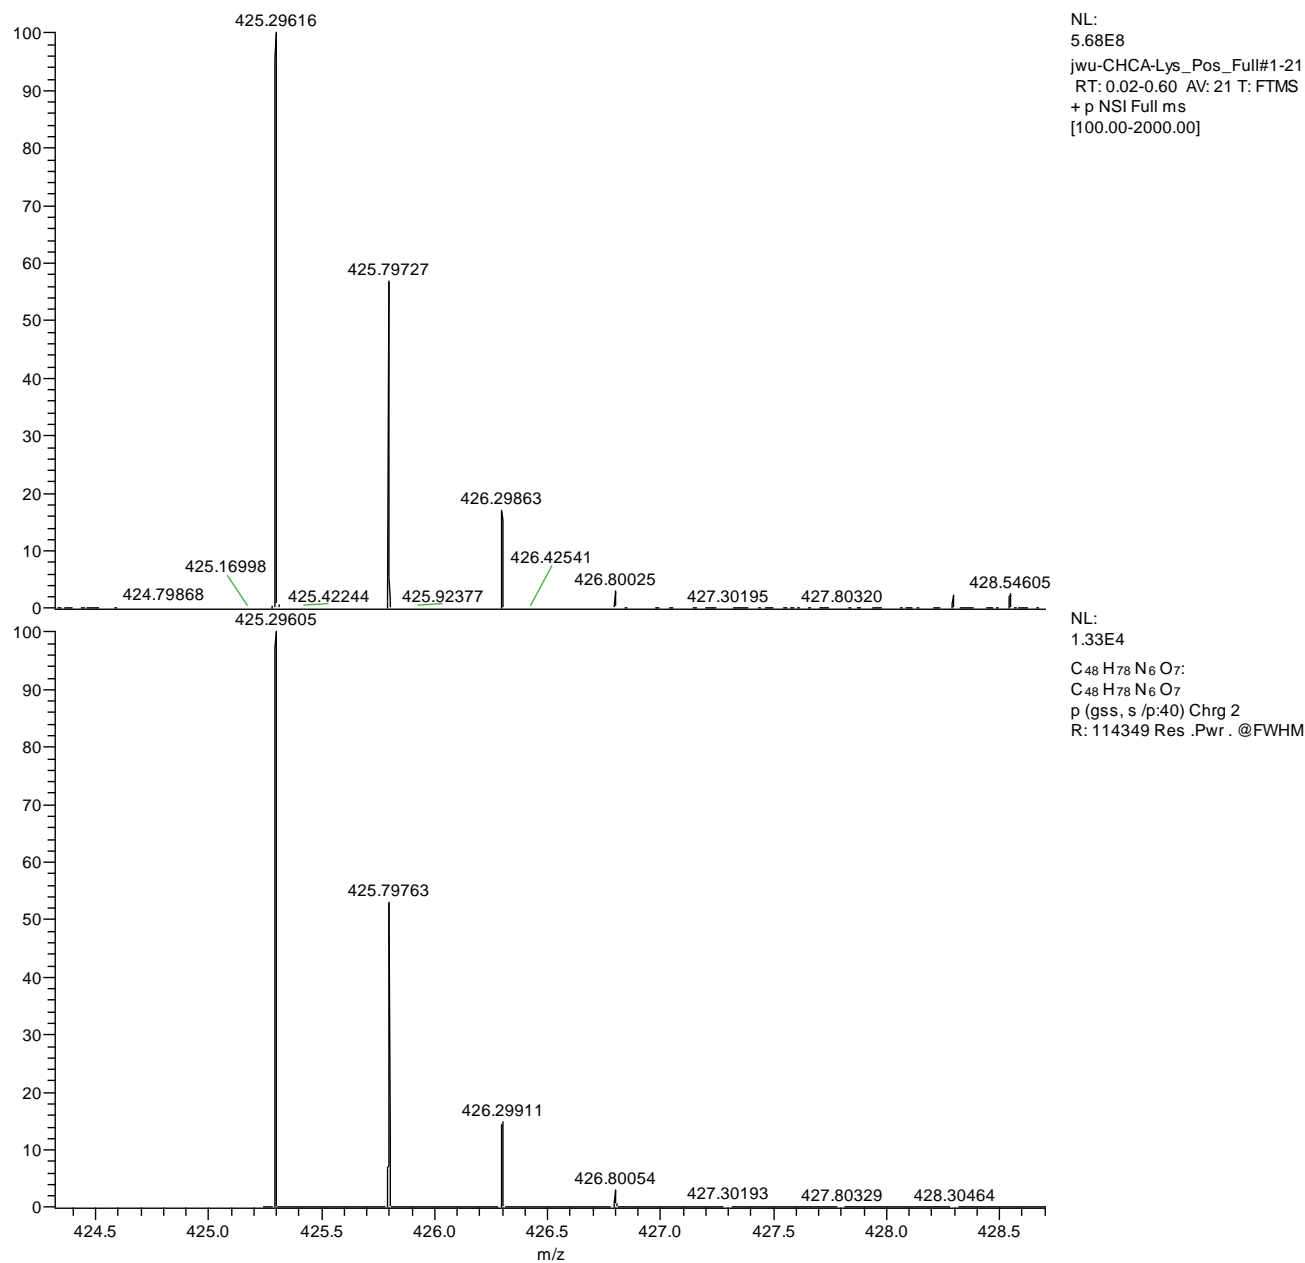

2,2'-(((3*R*,5*R*,8*R*,9*S*,10*S*,12*S*,13*R*,14*S*,17*R*)-17-((*R*)-5-(((*S*)-3-(1*H*-Indol-3-yl)-1-methoxy-1-oxopropan-2-yl)amino)-5-oxopentan-2-yl)-10,13-dimethylhexadecahydro-1*H*-cyclopenta[*a*]phenanthrene-3,12-diyl)bis(oxy))bis(2-oxoethan-1-aminium) (**18a**)

Full spectrum

jwu-DCA-Gly\_Pos\_Full #1-23 RT: 0.02-0.66 AV: 23 NL: 9.66E7  
T: FTMS + p NSI Full ms [100.00-2000.00]

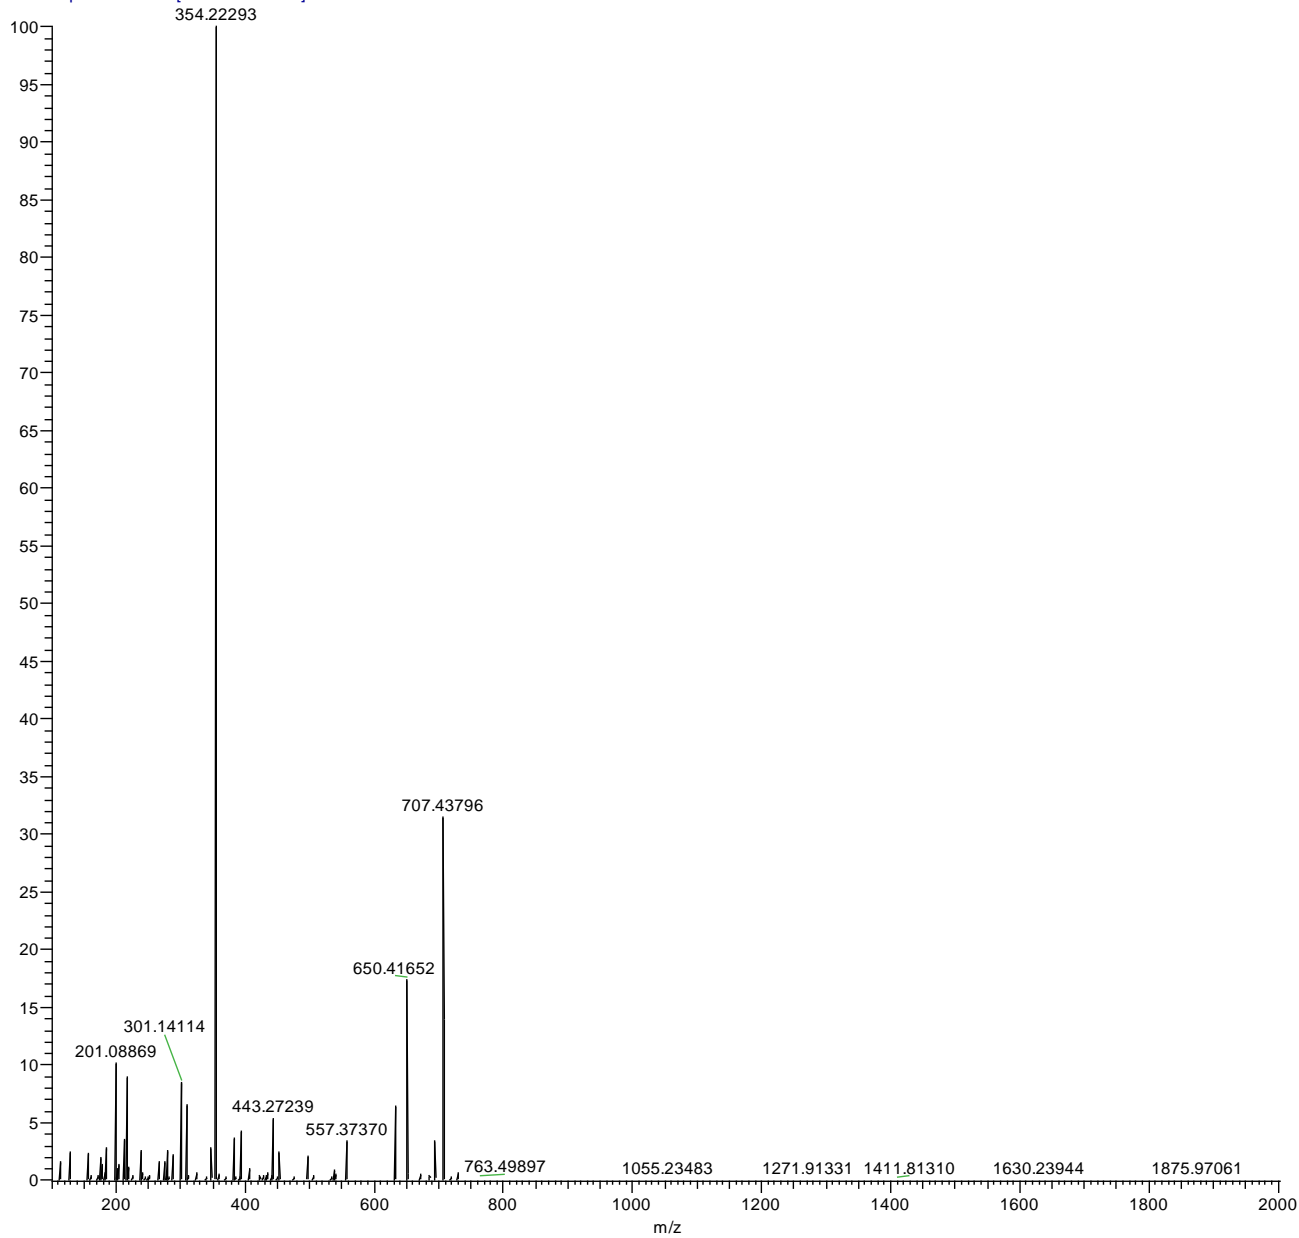

Zoomed spectrum (Top spectrum: measured mass; bottom spectrum: calculated mass)

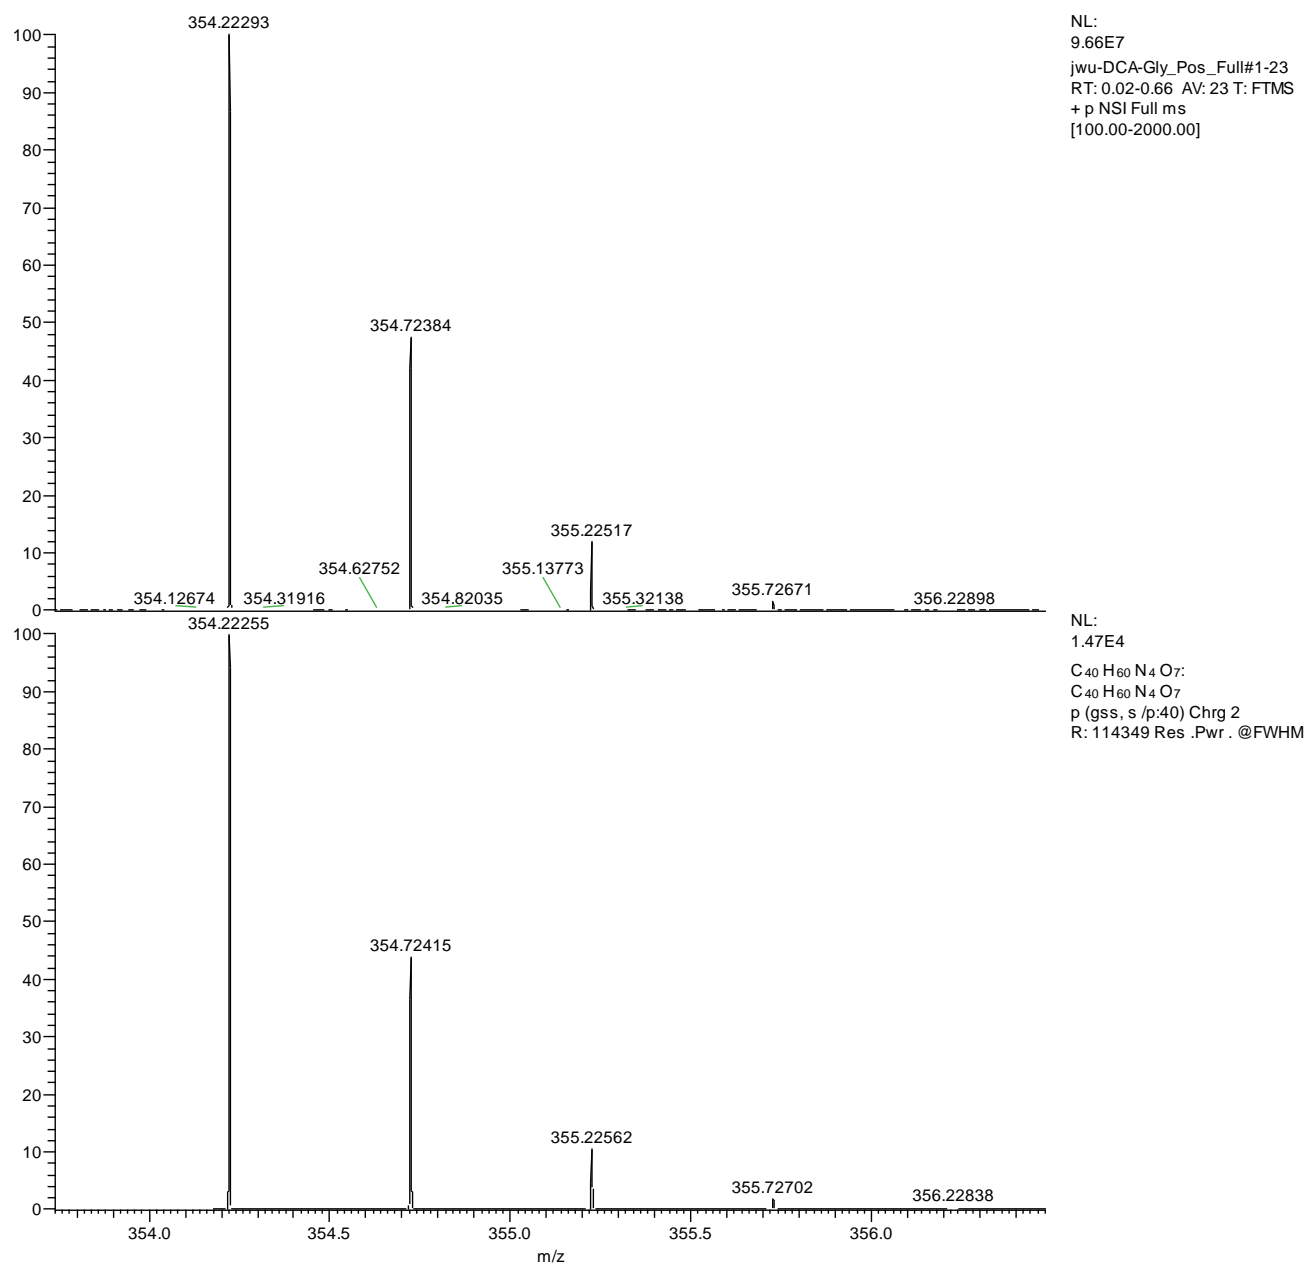



2,2'-(((3*R*,5*S*,7*R*,8*R*,9*S*,10*S*,12*S*,13*R*,14*S*,17*R*)-17-((*R*)-5-(((*S*)-3-(1*H*-Indol-3-yl)-1-methoxy-1-oxopropan-2-yl)amino)-5-oxopentan-2-yl)-3-(2-aminoacetoxy)-10,13-dimethylhexadecahydro-1*H*-cyclopenta[*a*]phenanthrene-7,12-diyl)bis(oxy))bis(2-oxoethan-1-aminium) (**19a**)

Full spectrum

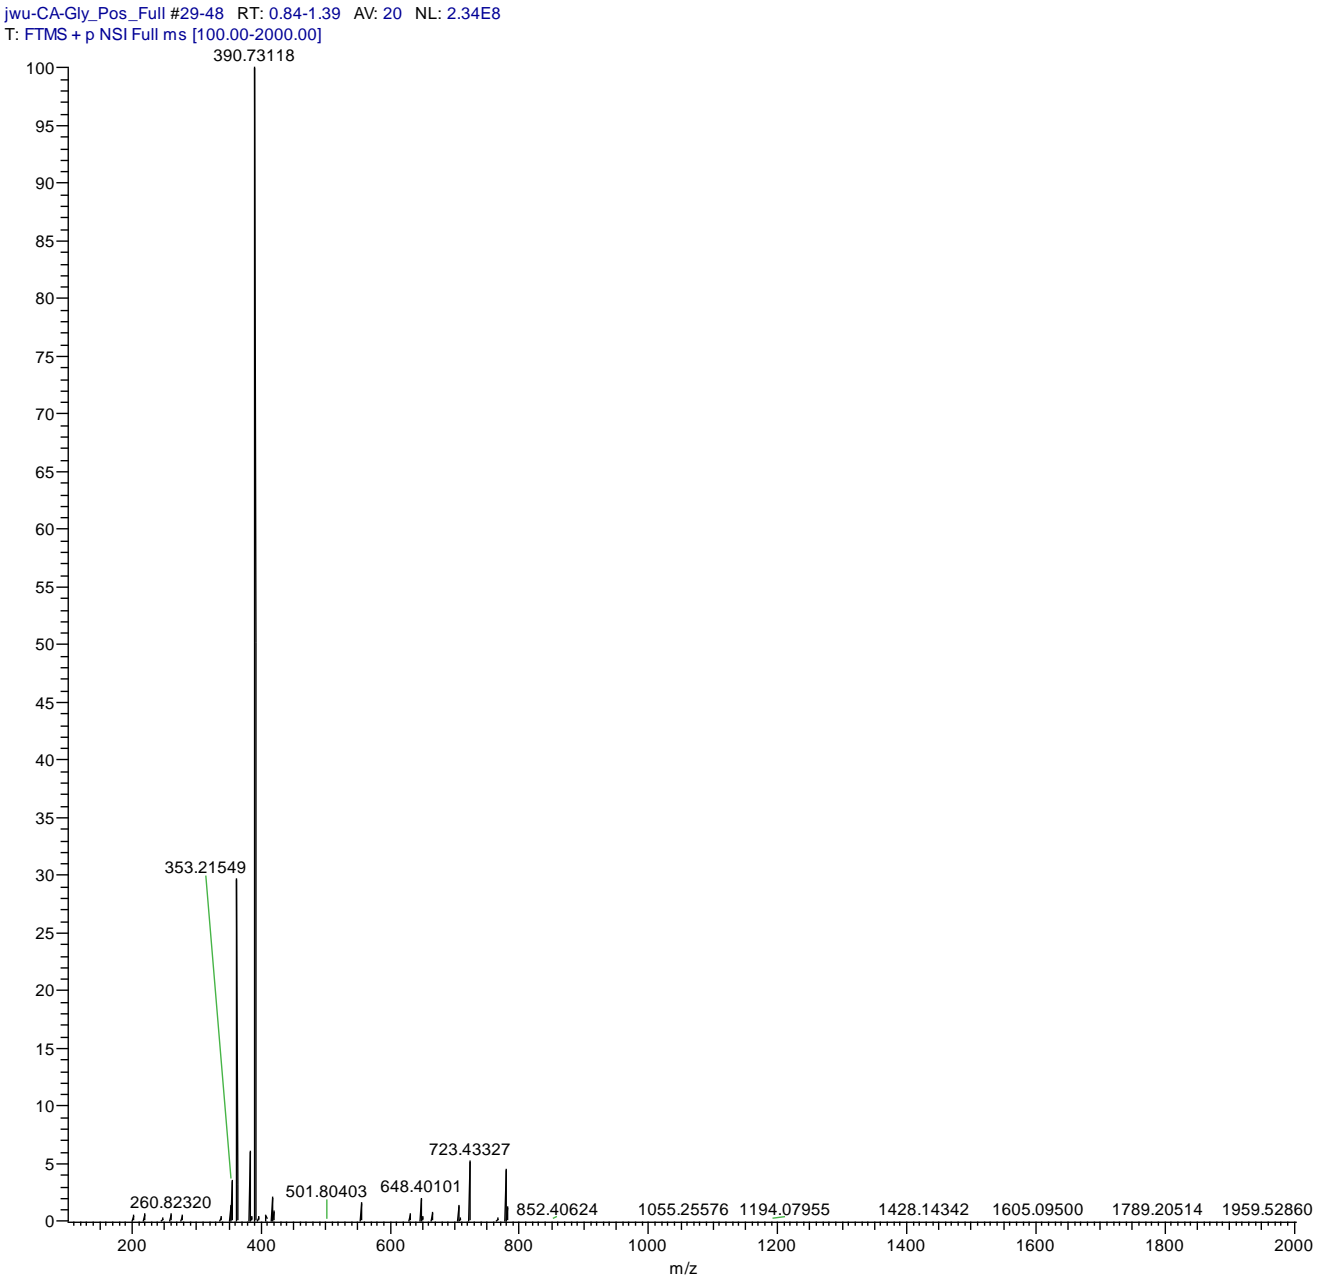

Zoomed spectrum (Top spectrum: measured mass; bottom spectrum: calculated mass)

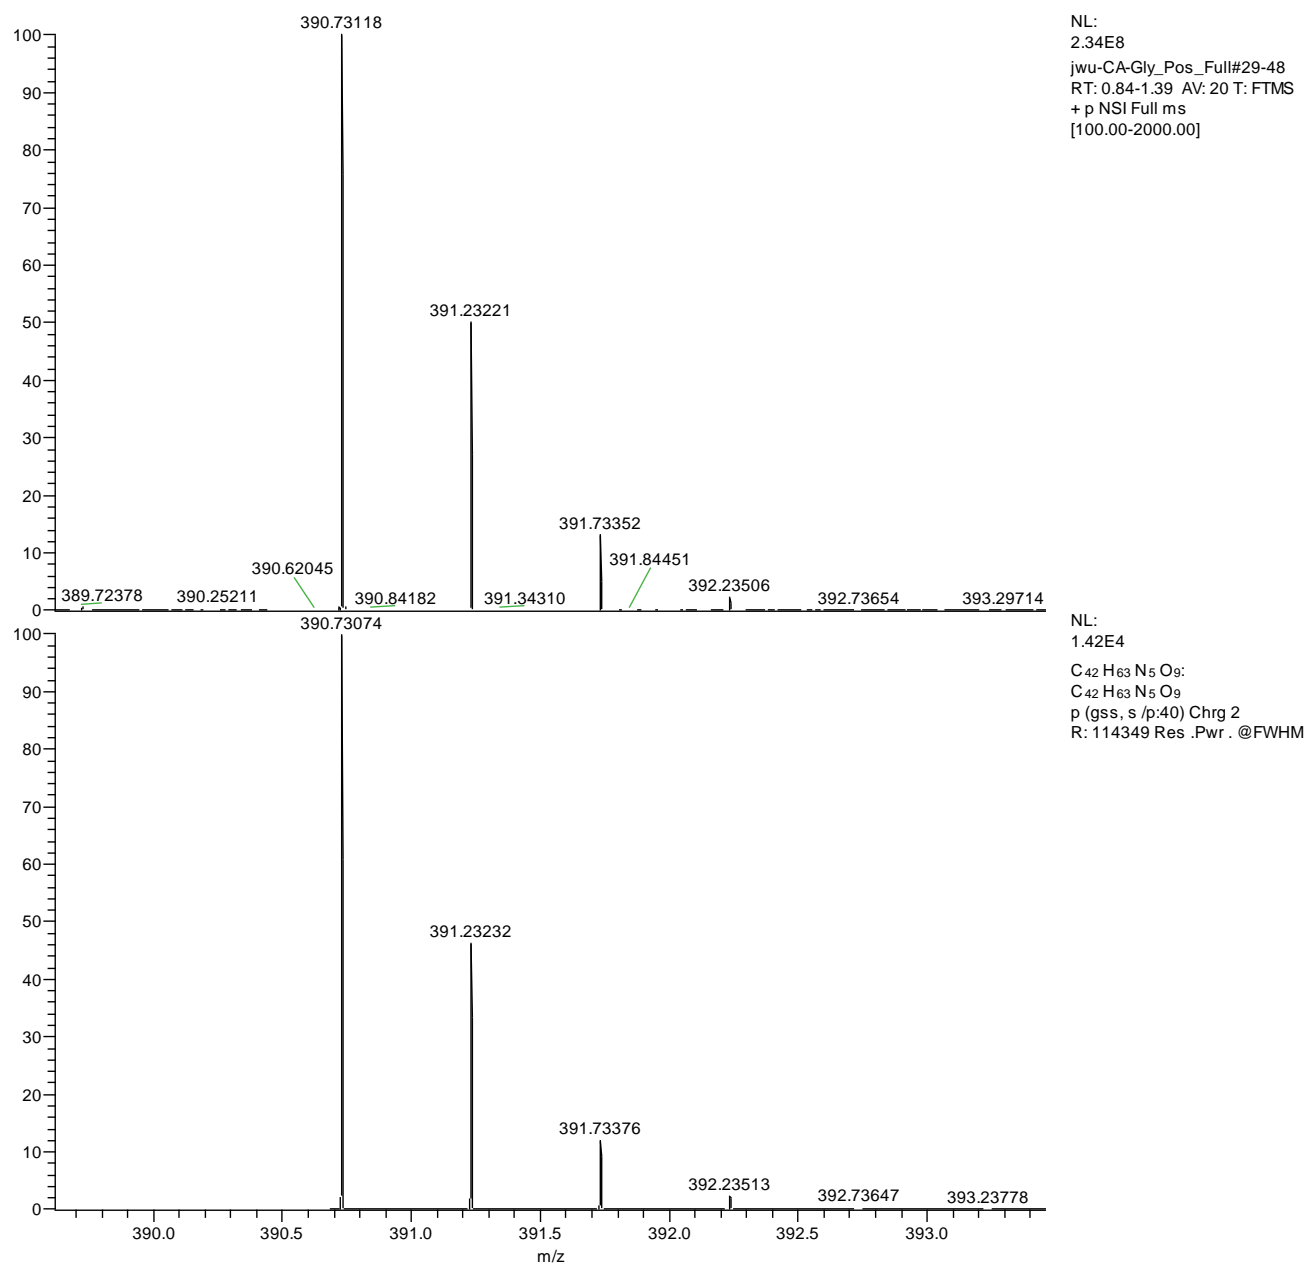

4,4',4''-(((3*R*,5*S*,7*R*,8*R*,9*S*,10*S*,12*S*,13*R*,14*S*,17*R*)-17-((*R*)-5-(((*S*)-3-(1*H*-Indol-3-yl)-1-methoxy-1-oxopropan-2-yl)amino)-5-oxopentan-2-yl)-10,13-dimethylhexadecahydro-1*H*-cyclopenta[*a*]phenanthrene-3,7,12-triyl)tris(oxy))tris(4-oxobutan-1-aminium) (**19b**)

## Full spectrum

jwu-CA-Gaba\_Pos\_Full #2-40 RT: 0.04-1.15 AV: 39 NL: 3.45E6

T: FTMS + p NSI Full ms [100.00-2000.00]

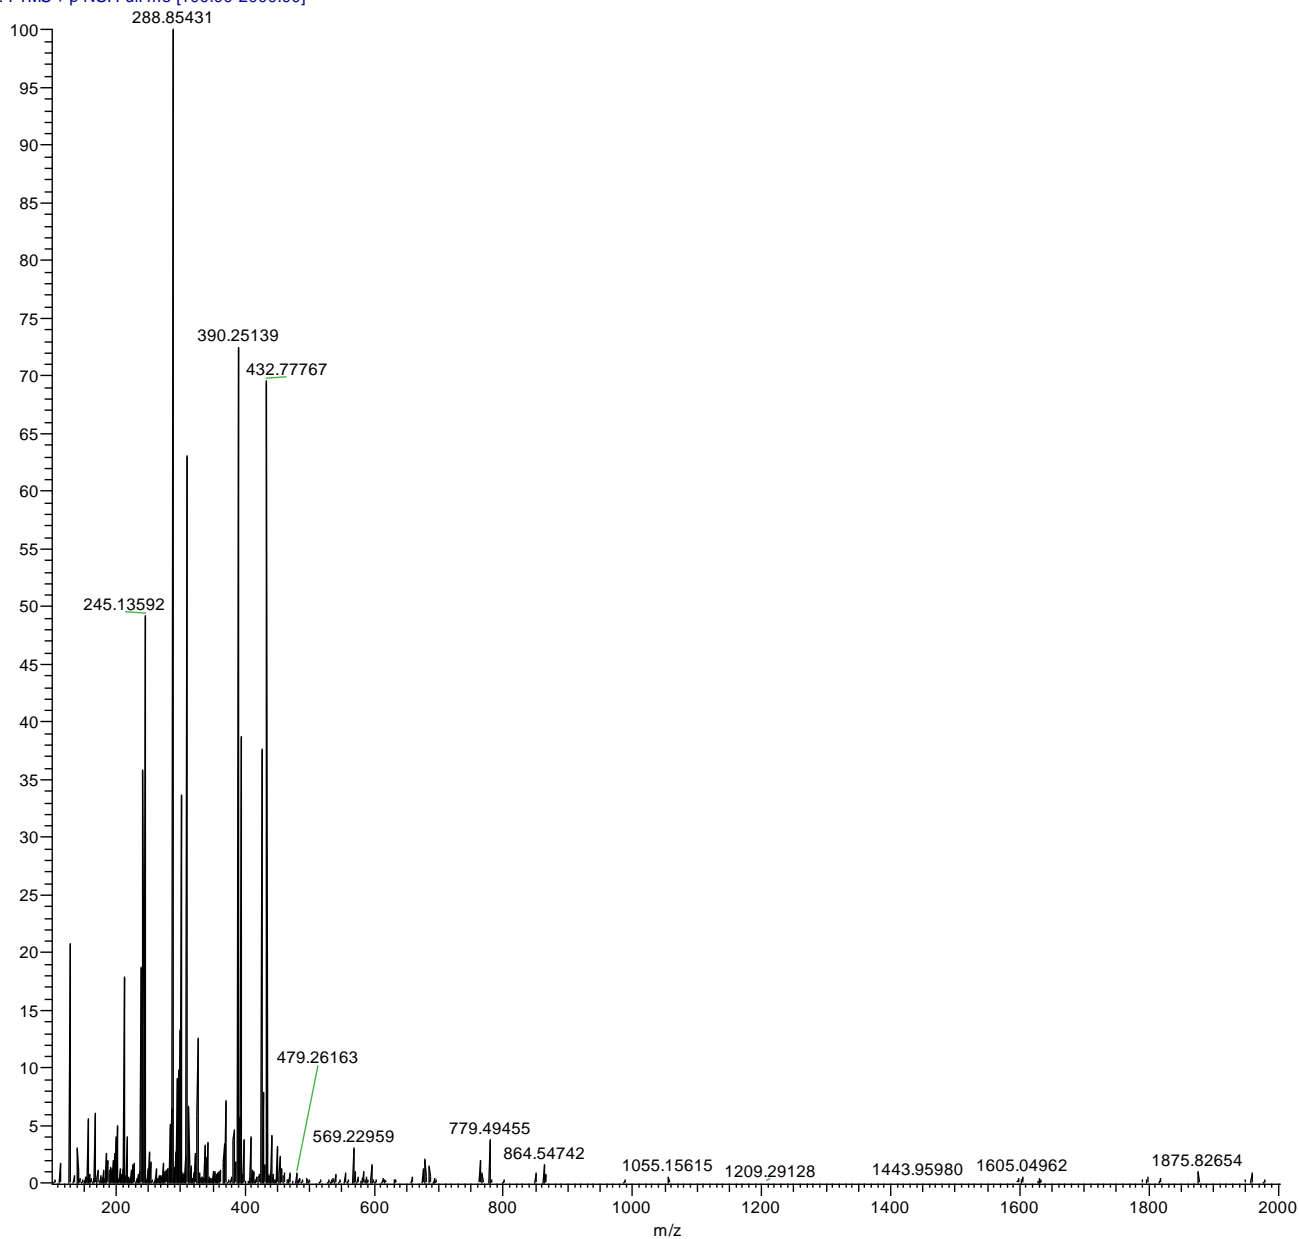

Zoomed spectrum (Top spectrum: measured mass; bottom spectrum: calculated mass)

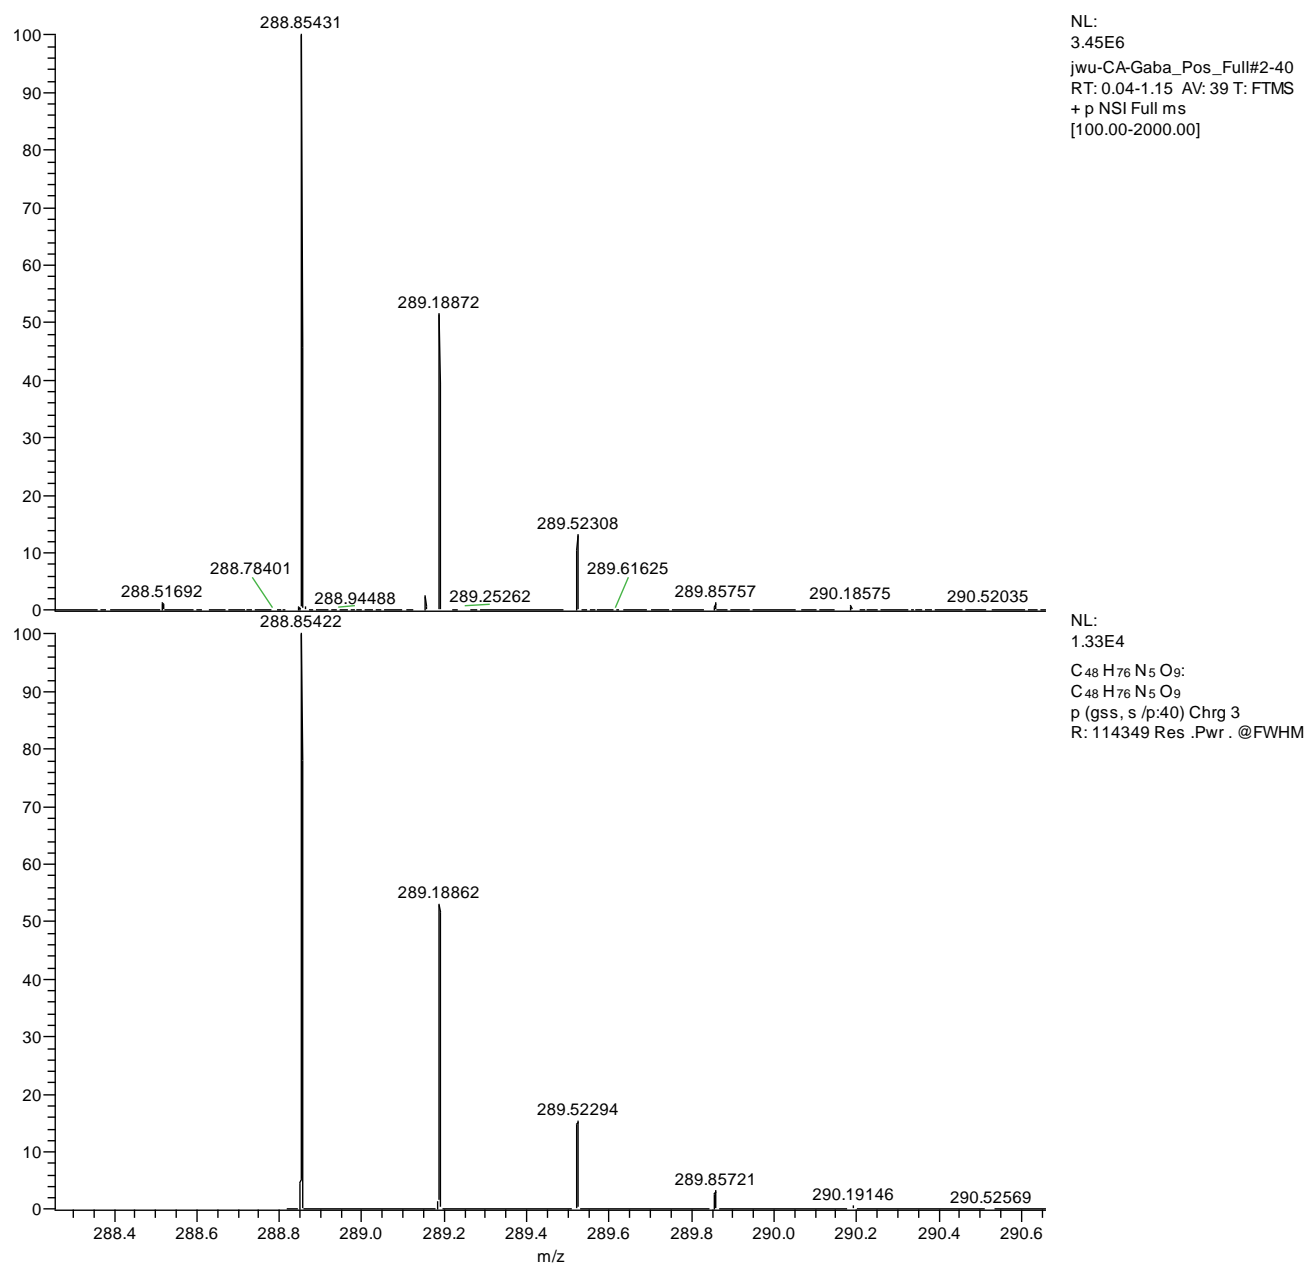

(4*S*,4'*S*,4''*S*)-5,5',5''-(((3*R*,5*S*,7*R*,8*R*,9*S*,10*S*,12*S*,13*R*,14*S*,17*R*)-17-((*R*)-5-(((*S*)-3-(1*H*-Indol-3-yl)-1-methoxy-1-oxopropan-2-yl)amino)-5-oxopentan-2-yl)-10,13-dimethylhexadecahydro-1*H*-cyclopenta[*a*]phenanthrene-3,7,12-triyl)tris(oxy))tris(5-oxopentane-1,4-diaminium) (**19c**)

## Full spectrum

jwu-CA-Orn\_Pos\_Full\_a #11-19 RT: 0.32-0.55 AV: 9 NL: 1.59E8

T: FTMS + p NSI Full ms [100.00-2000.00]

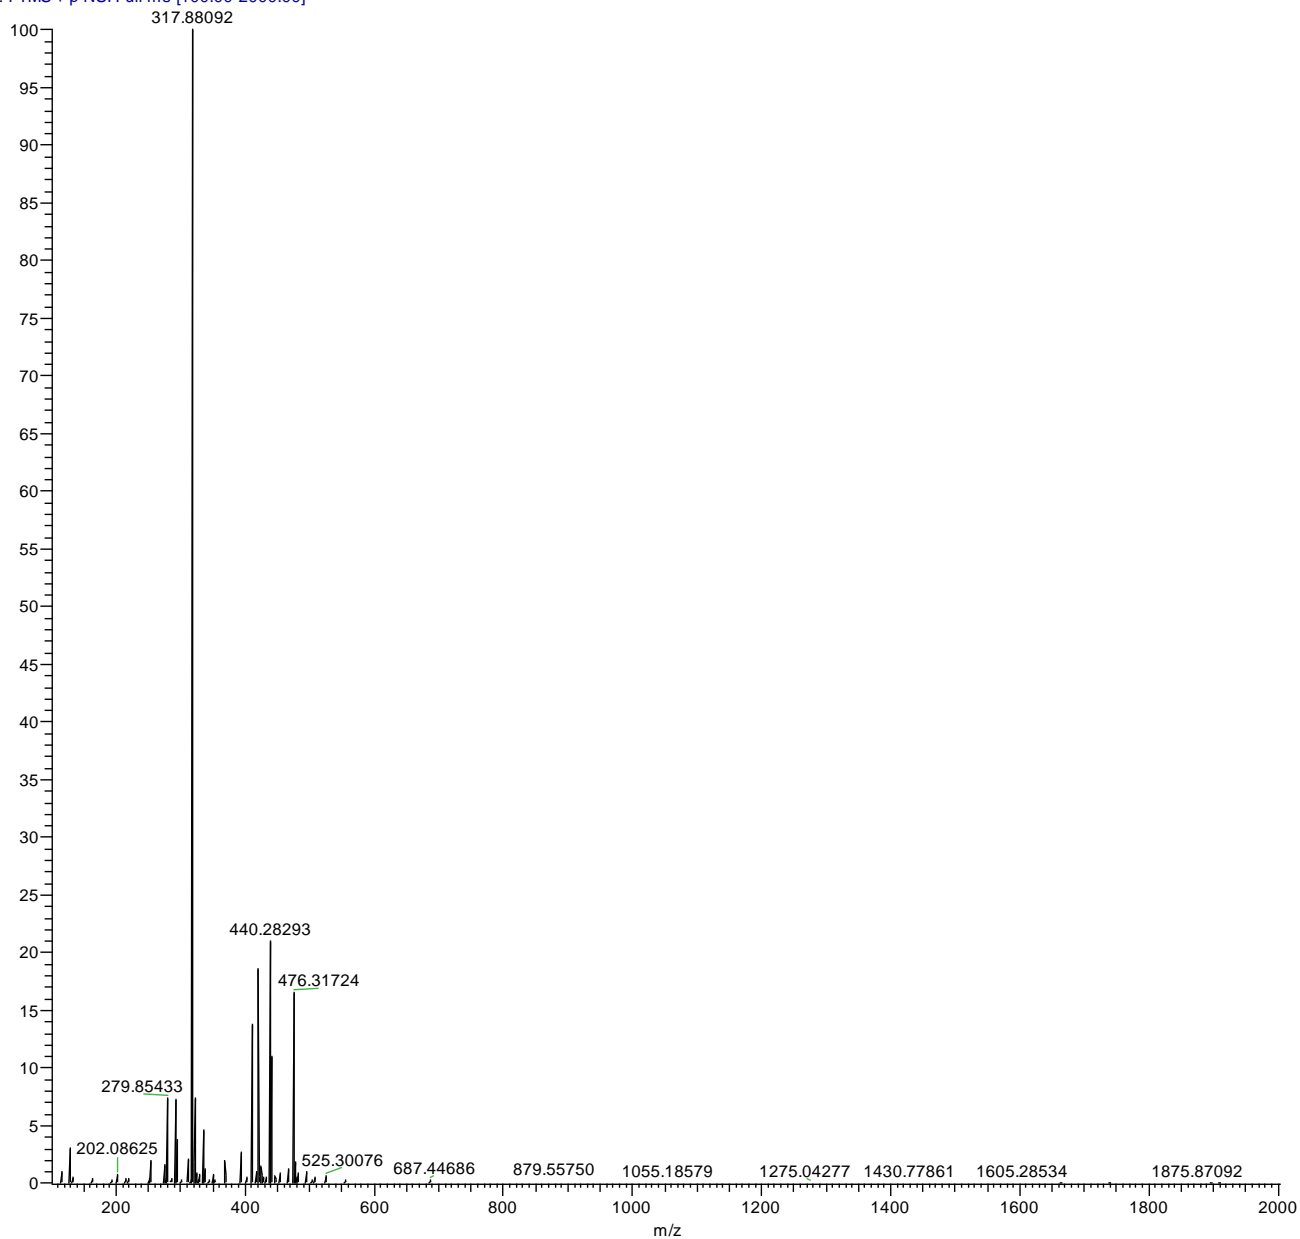

Zoomed spectrum (Top spectrum: measured mass; bottom spectrum: calculated mass)

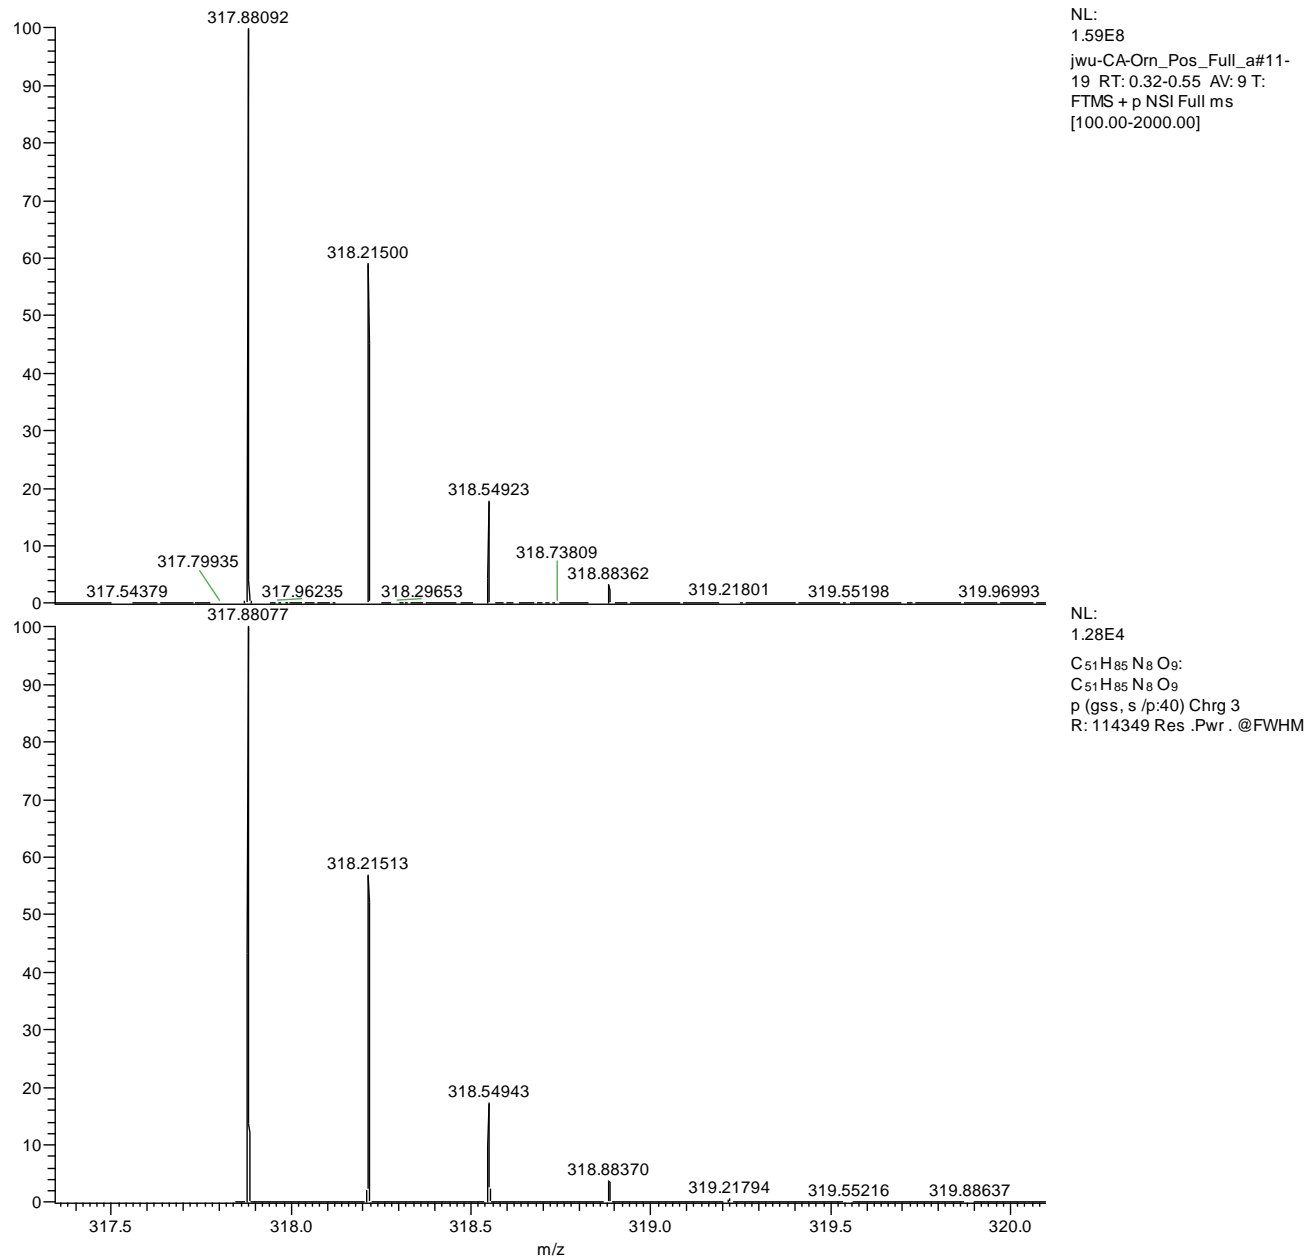

(5*S*,5'*S*,5''*S*)-6,6',6''-(((3*R*,5*S*,7*R*,8*R*,9*S*,10*S*,12*S*,13*R*,14*S*,17*R*)-17-((*R*)-5-(((*S*)-3-(1*H*-Indol-3-yl)-1-methoxy-1-oxopropan-2-yl)amino)-5-oxopentan-2-yl)-10,13-dimethylhexadecahydro-1*H*-cyclopenta[*a*]phenanthrene-3,7,12-triyl)tris(oxy))tris(6-oxohexane-1,5-diaminium) (**19d**)

Full spectrum

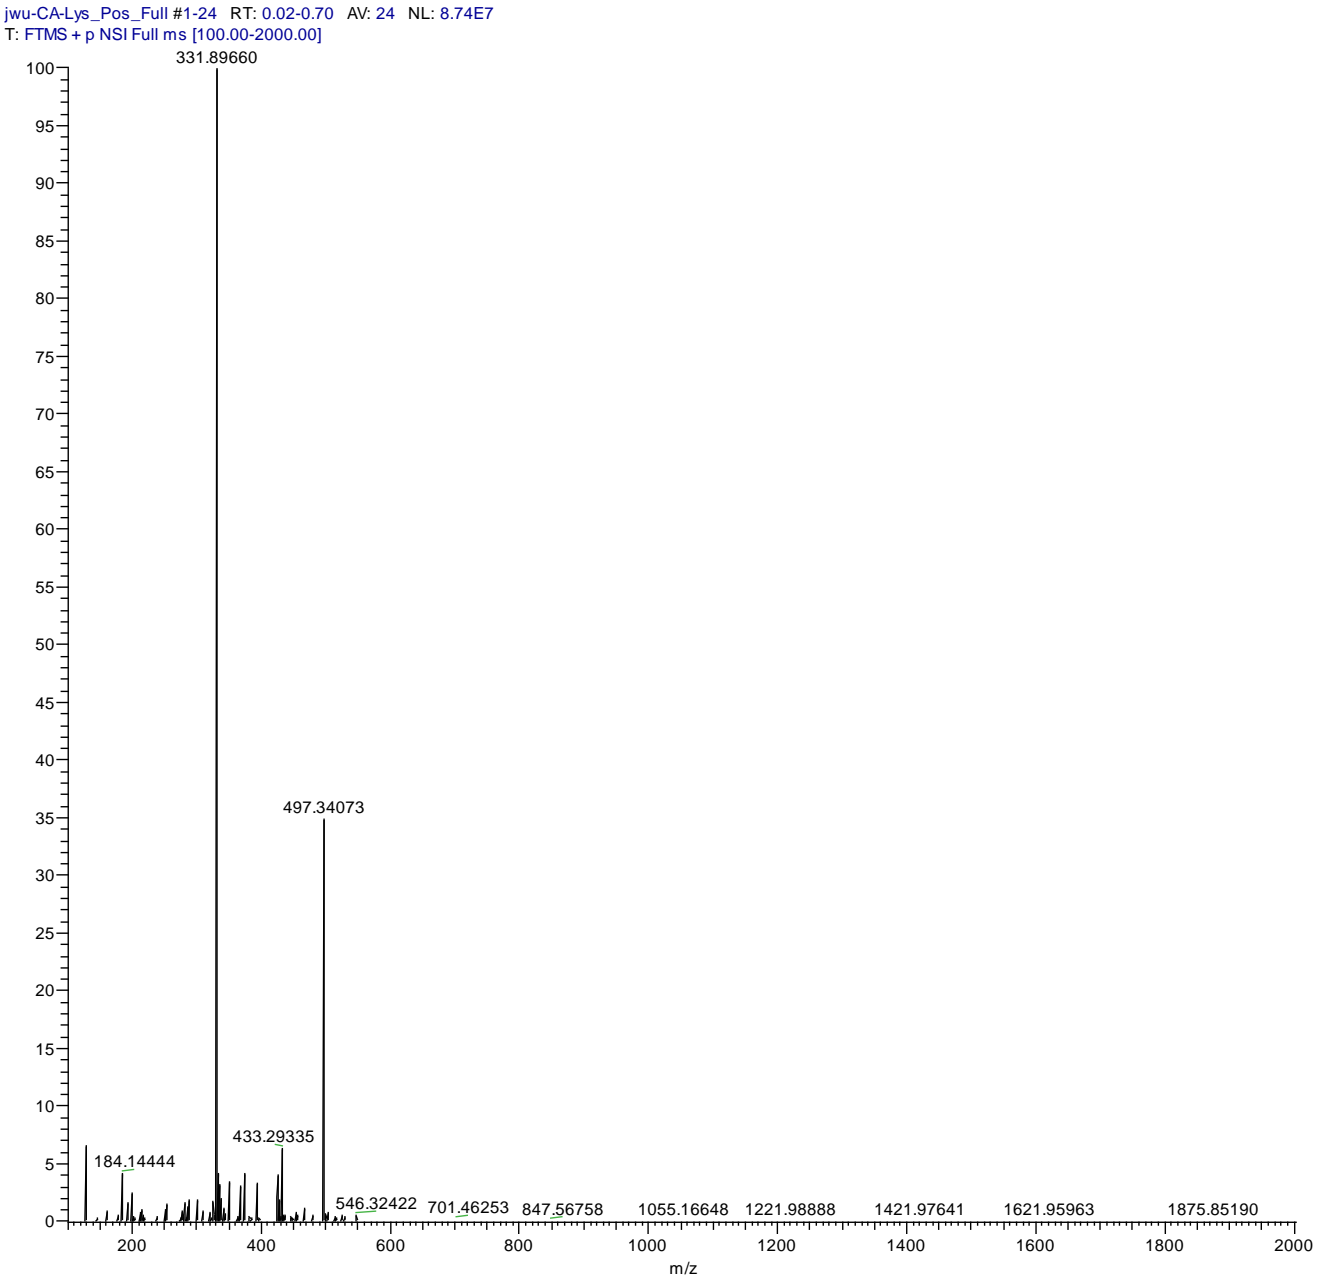

Zoomed spectrum (Top spectrum: measured mass; bottom spectrum: calculated mass)

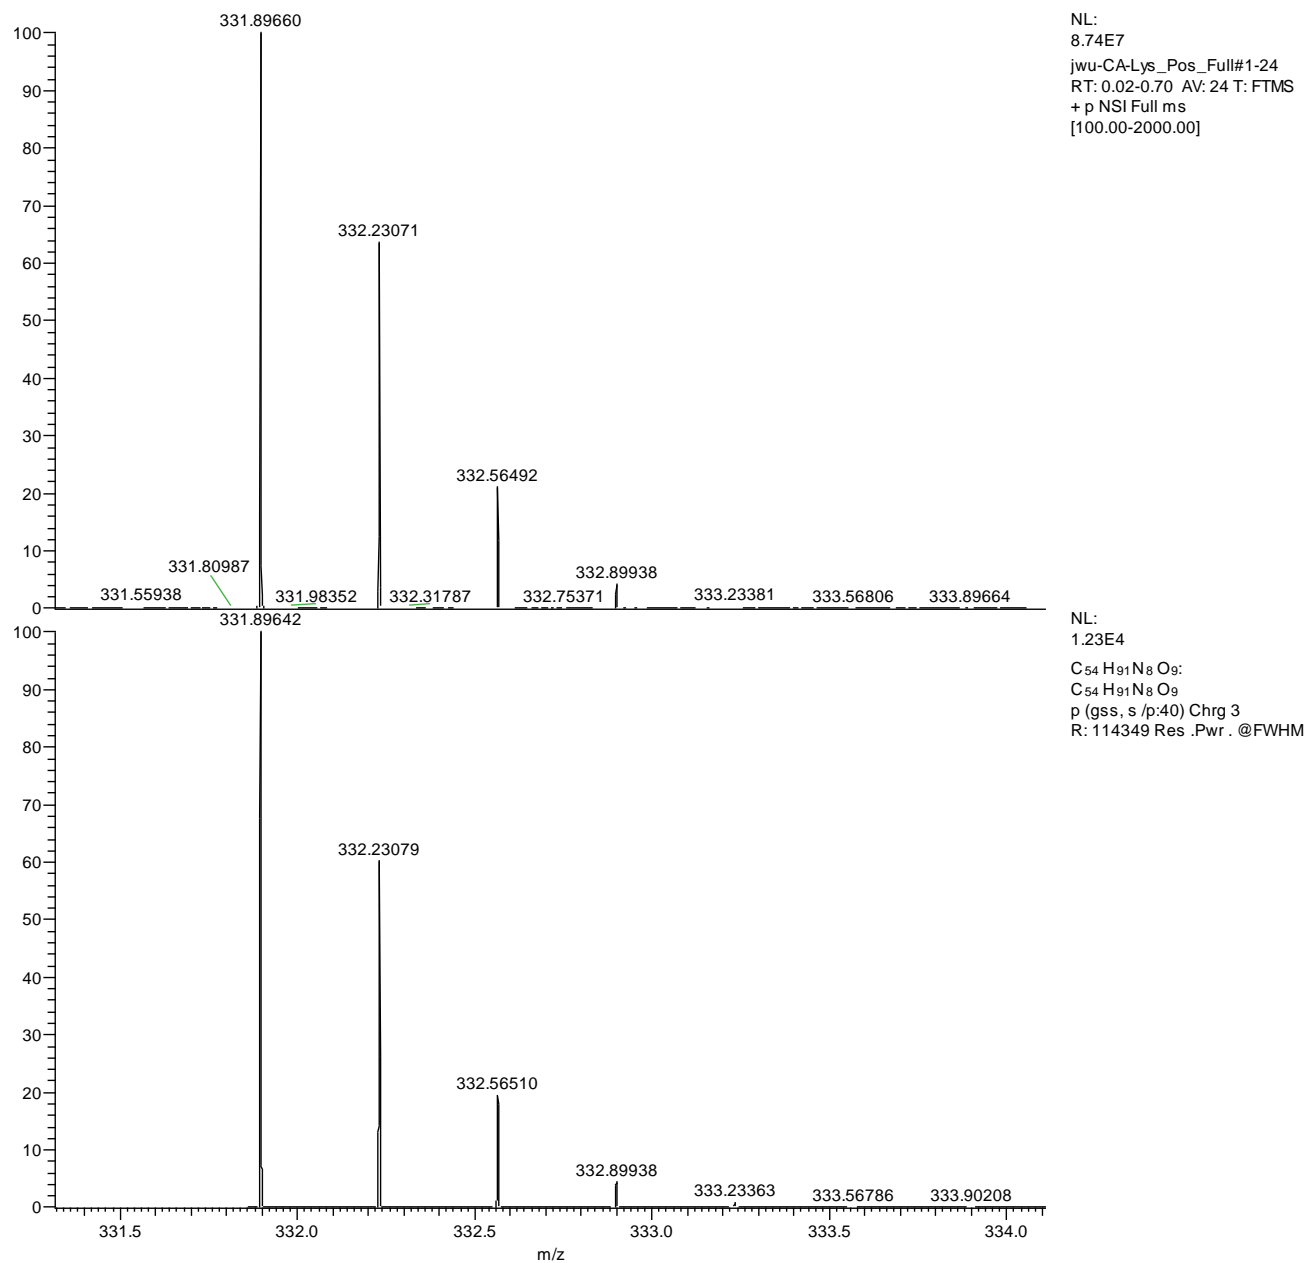



(4*S*,4'*S*)-5,5'-(((3*R*,5*S*,7*R*,8*R*,9*S*,10*S*,13*R*,14*S*,17*R*)-17-((*R*)-5-(((*S*)-1-Methoxy-1-oxo-3-phenylpropan-2-yl)amino)-5-oxopentan-2-yl)-10,13-dimethylhexadecahydro-1*H*-cyclopenta[*a*]phenanthrene-3,7-diyl)bis(oxy))bis(5-oxopentane-1,4-diaminium) (**20**)

## Full spectrum

jwu-Phe-Orn\_Pos\_Full #27-40 RT: 0.77-1.15 AV: 14 NL: 2.09E8

T: FTMS + p NSI Full ms [100.00-2000.00]

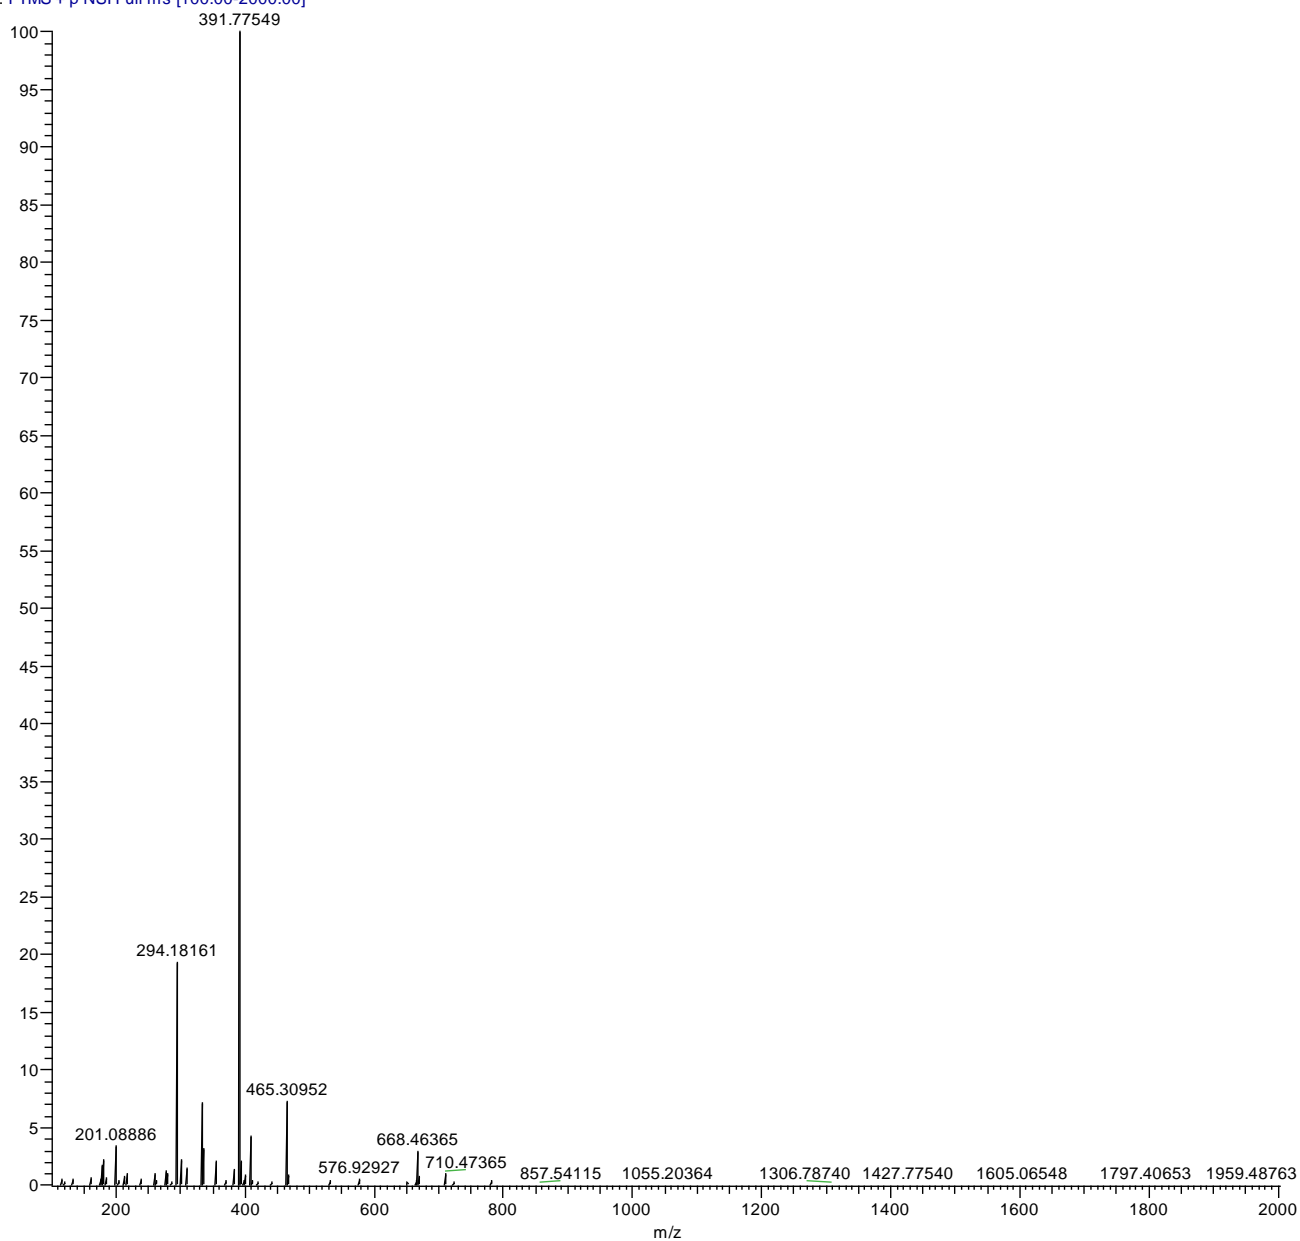

Zoomed spectrum (Top spectrum: measured mass; bottom spectrum: calculated mass)

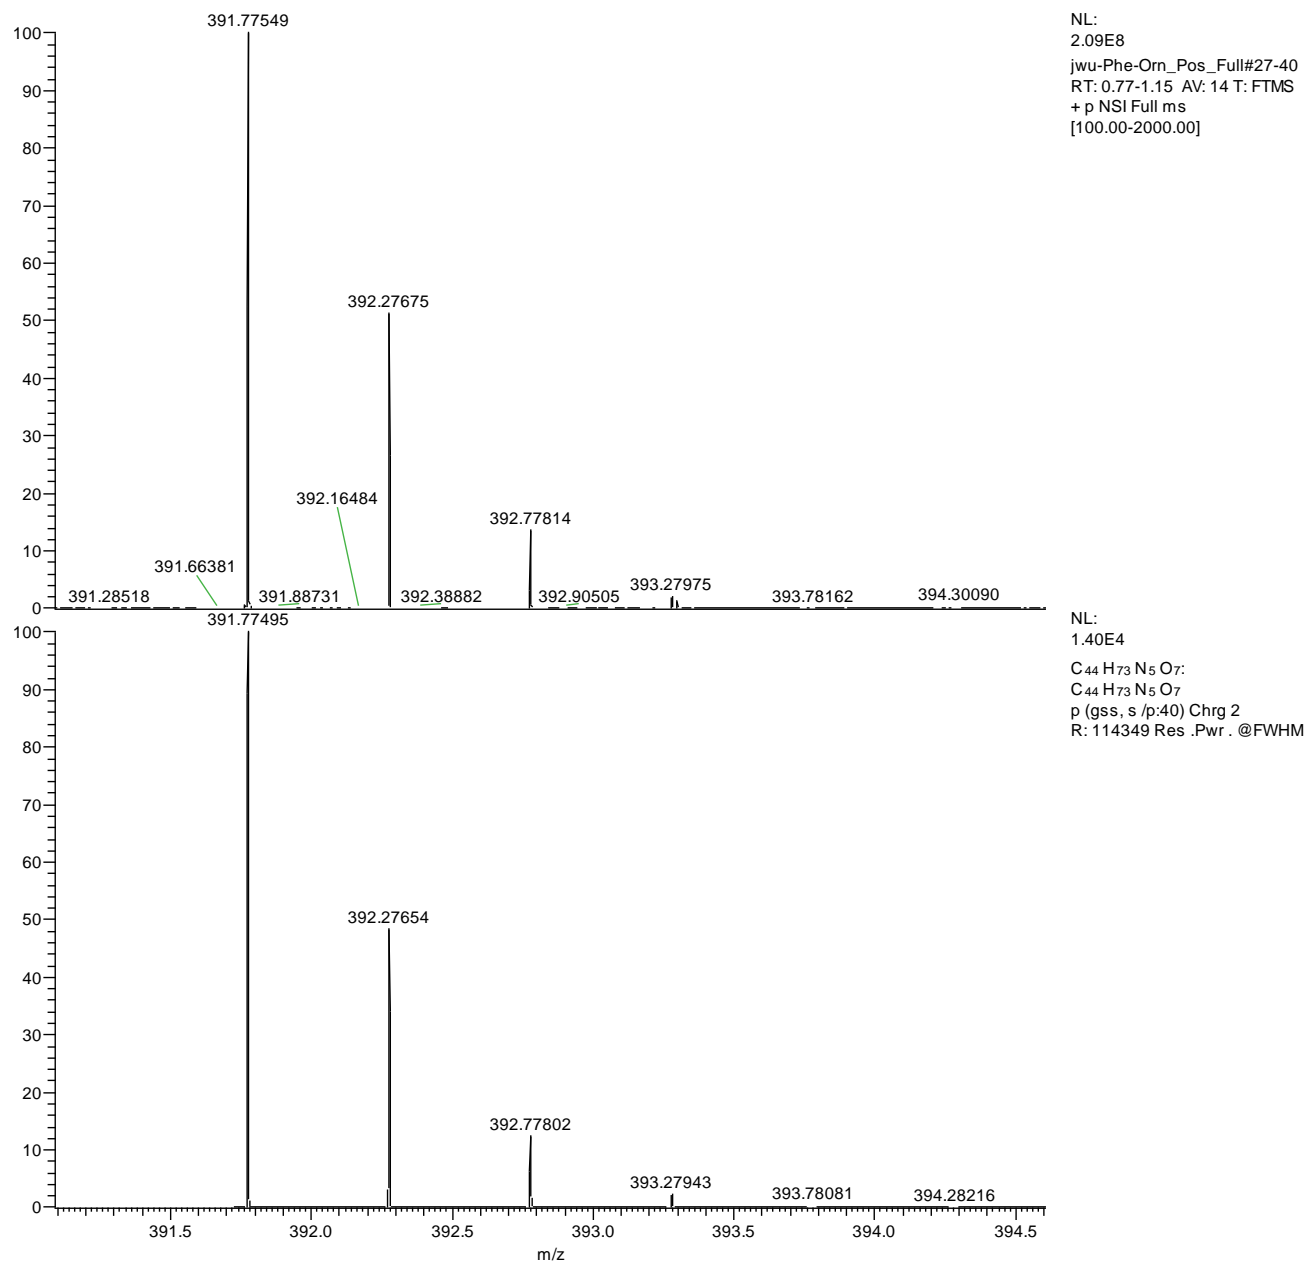

(4*S*,4'*S*)-5,5'-(((3*R*,5*S*,7*R*,8*R*,9*S*,10*S*,13*R*,14*S*,17*R*)-17-((*R*)-5-(Benzylamino)-5-oxopentan-2-yl)-10,13-dimethylhexadecahydro-1*H*-cyclopenta[*a*]phenanthrene-3,7-diyl)bis(oxy))bis(5-oxopentane-1,4-diaminium) (**21**)

## Full spectrum

jwu-BA-Orn\_Pos\_Full #1-19 RT: 0.02-0.54 AV: 19 NL: 2.16E8

T: FTMS + p NSI Full ms [100.00-2000.00]

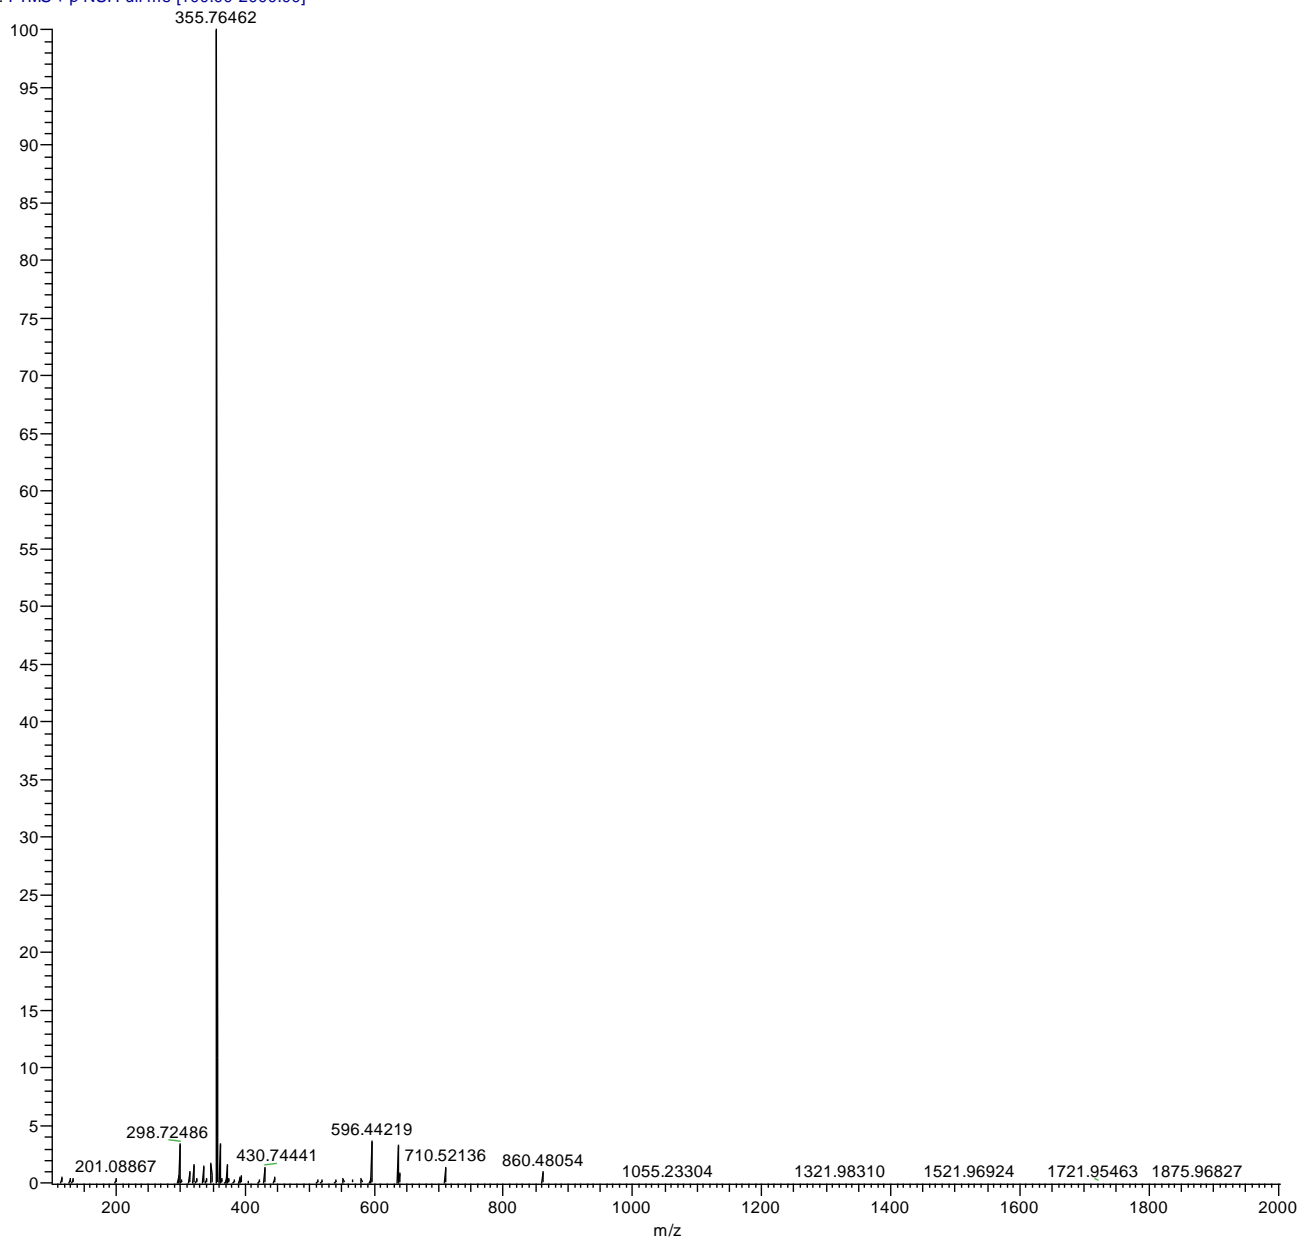

Zoomed spectrum (Top spectrum: measured mass; bottom spectrum: calculated mass)

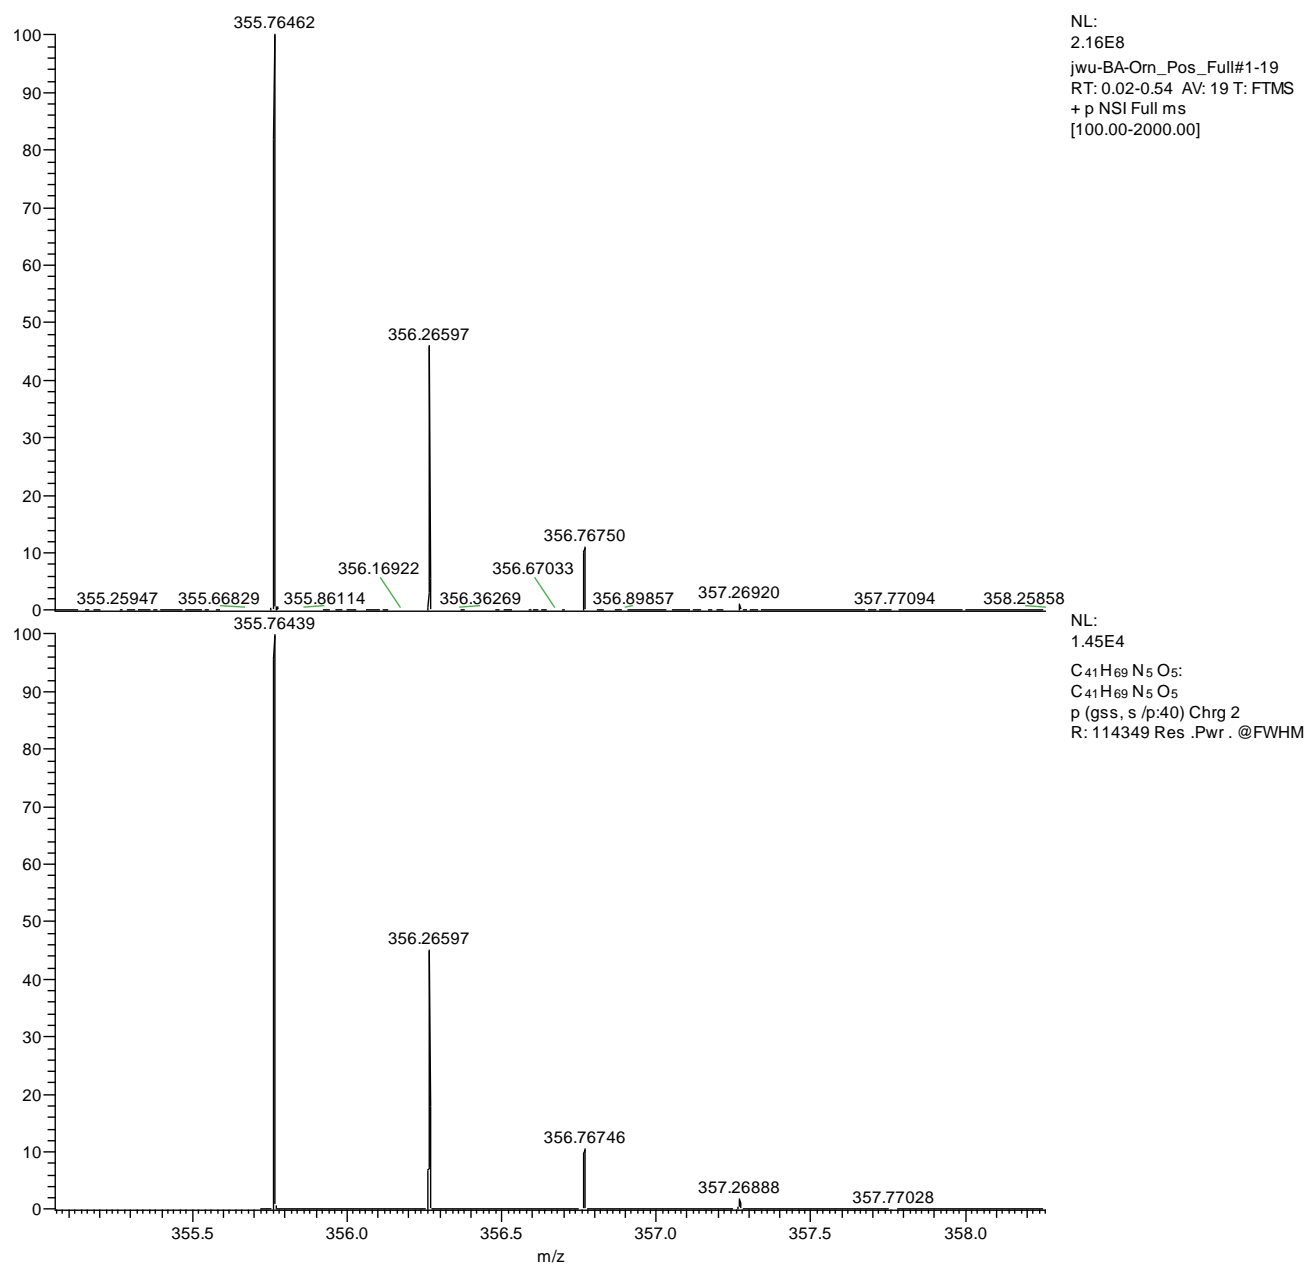

((4-(((3*R*,5*R*,8*R*,9*S*,10*S*,13*R*,14*S*,17*R*)-17-((*R*)-5-(((*S*)-3-(1*H*-Indol-3-yl)-1-methoxy-1-oxopropan-2-yl)amino)-5-oxopentan-2-yl)-10,13-dimethylhexadecahydro-1*H*-cyclopenta[*a*]phenanthren-3-yl)oxy)-4-oxobutyl)amino)(amino)methaniminium (**23**)

## Full spectrum

jwu-LICA-Gdn\_Pos\_Full #1-22 RT: 0.02-0.62 AV: 22 NL: 3.12E7

T: FTMS + p NSI Full ms [100.00-2000.00]

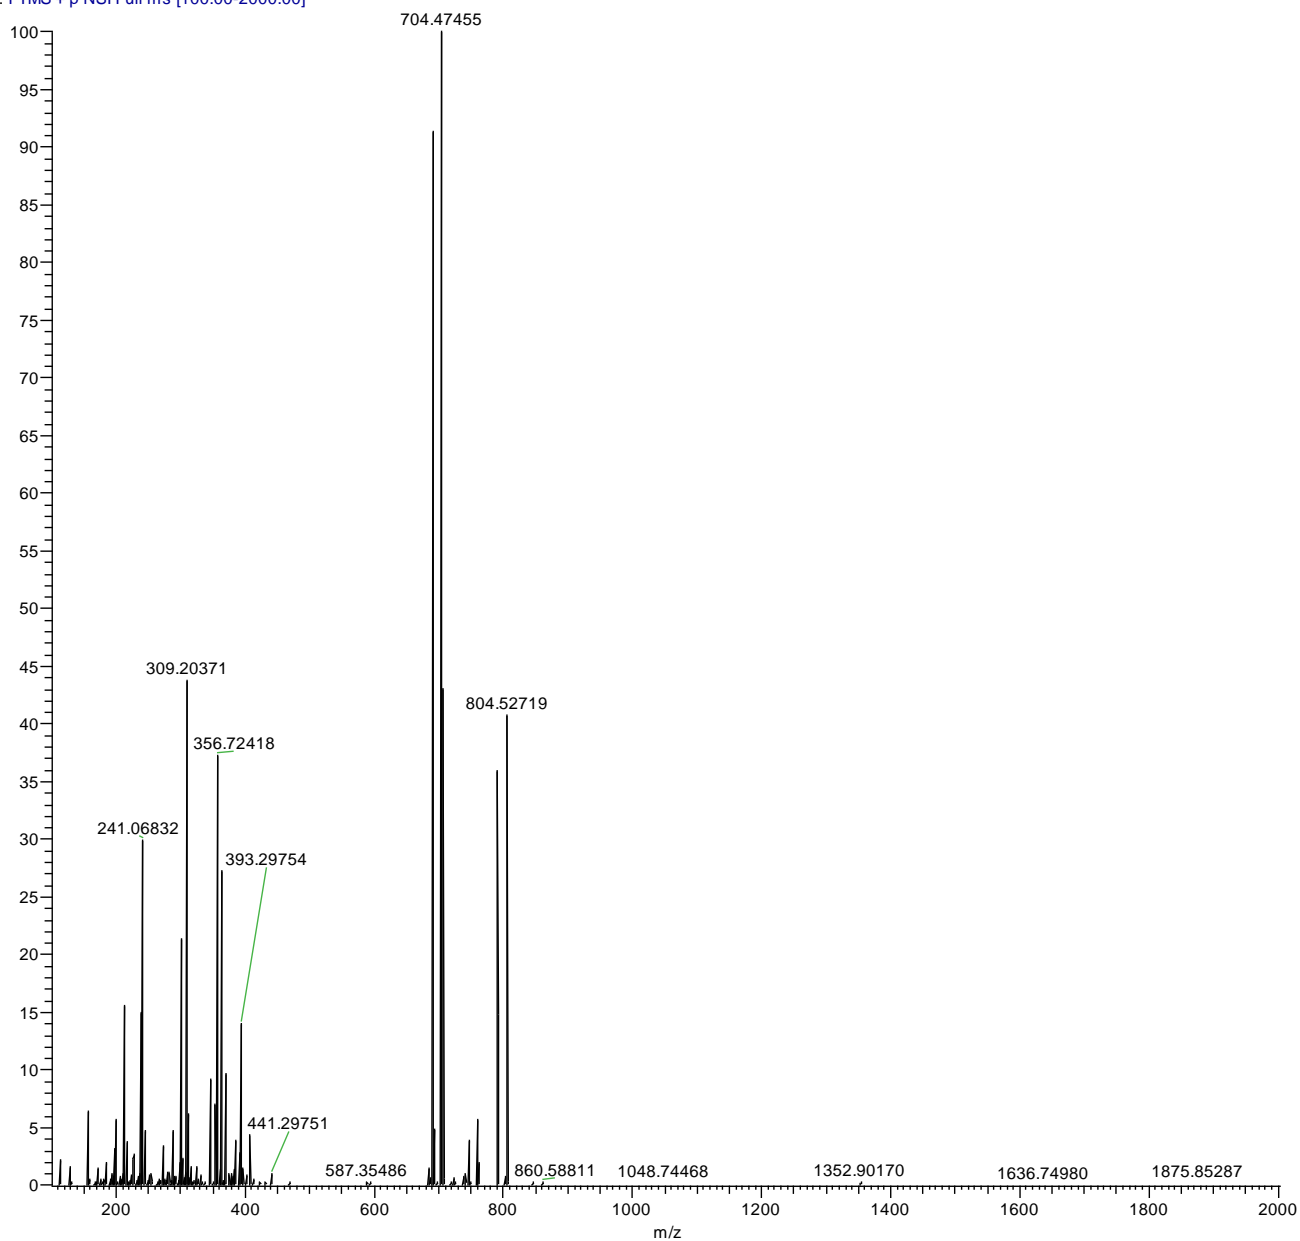

Zoomed spectrum (Top spectrum: measured mass; bottom spectrum: calculated mass)

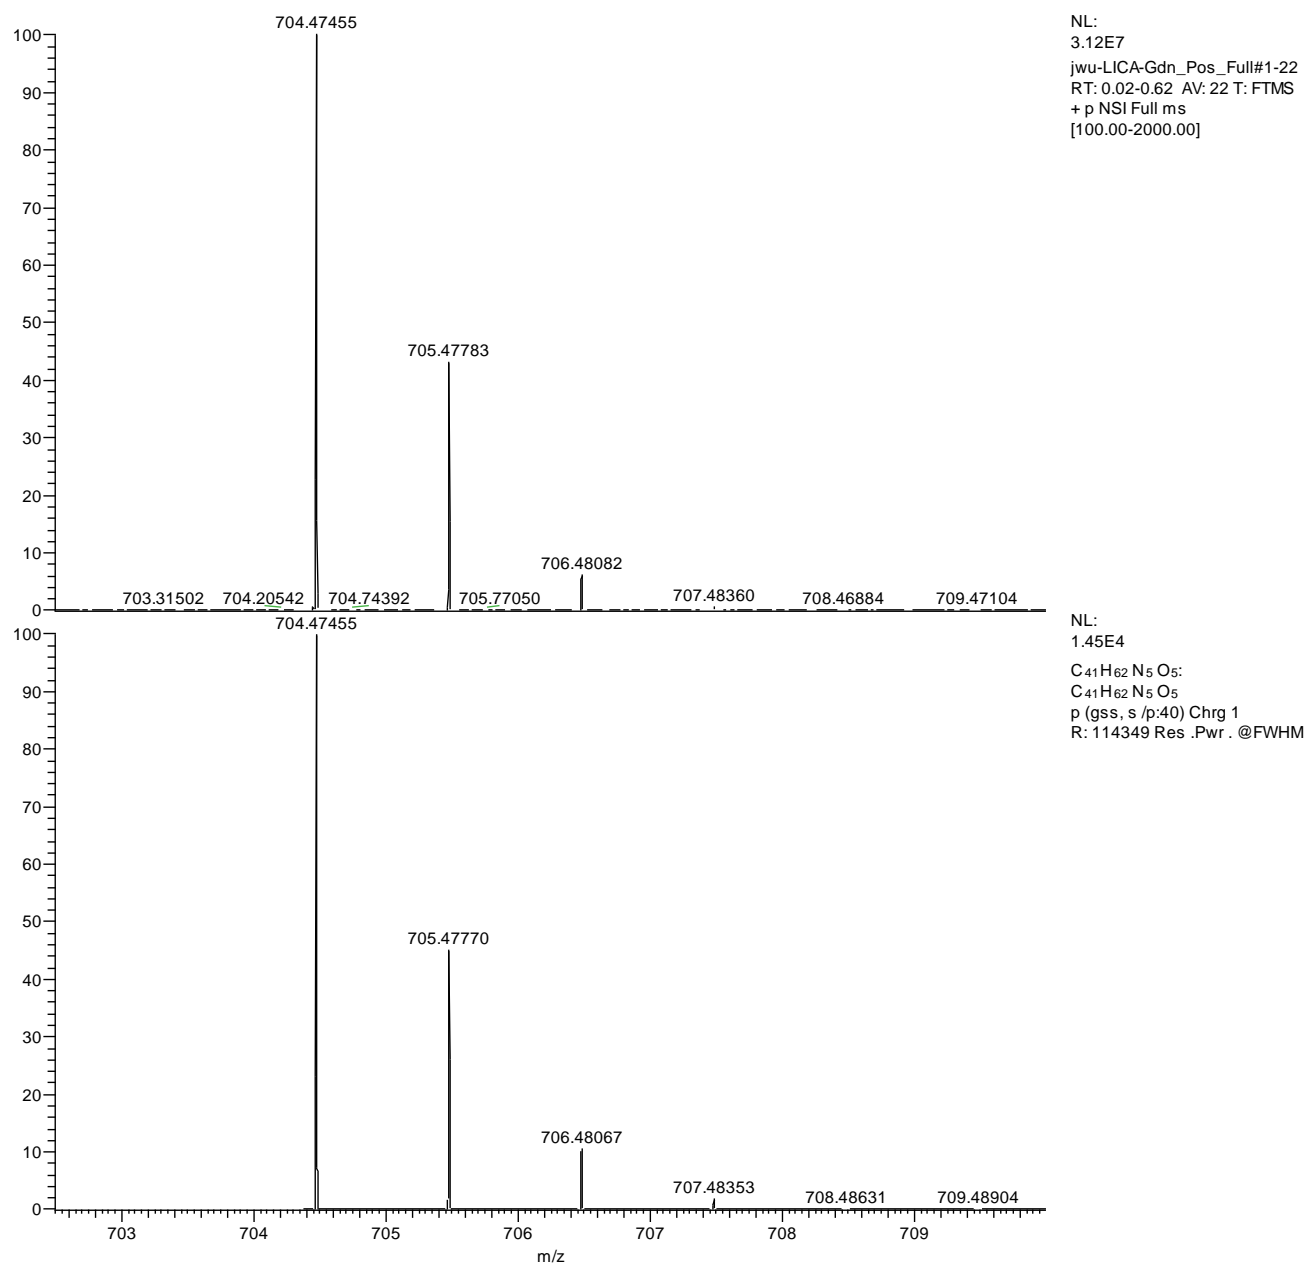

Methyl ((*R*)-4-((3*R*,5*R*,8*R*,9*S*,10*S*,13*R*,14*S*,17*R*)-3-((*L*-lysylglycyl)oxy)-10,13-dimethylhexadecahydro-1*H*-cyclopenta[*a*]phenanthren-17-yl)pentanoyl)-*L*-tryptophanate (**25**)

Full spectrum

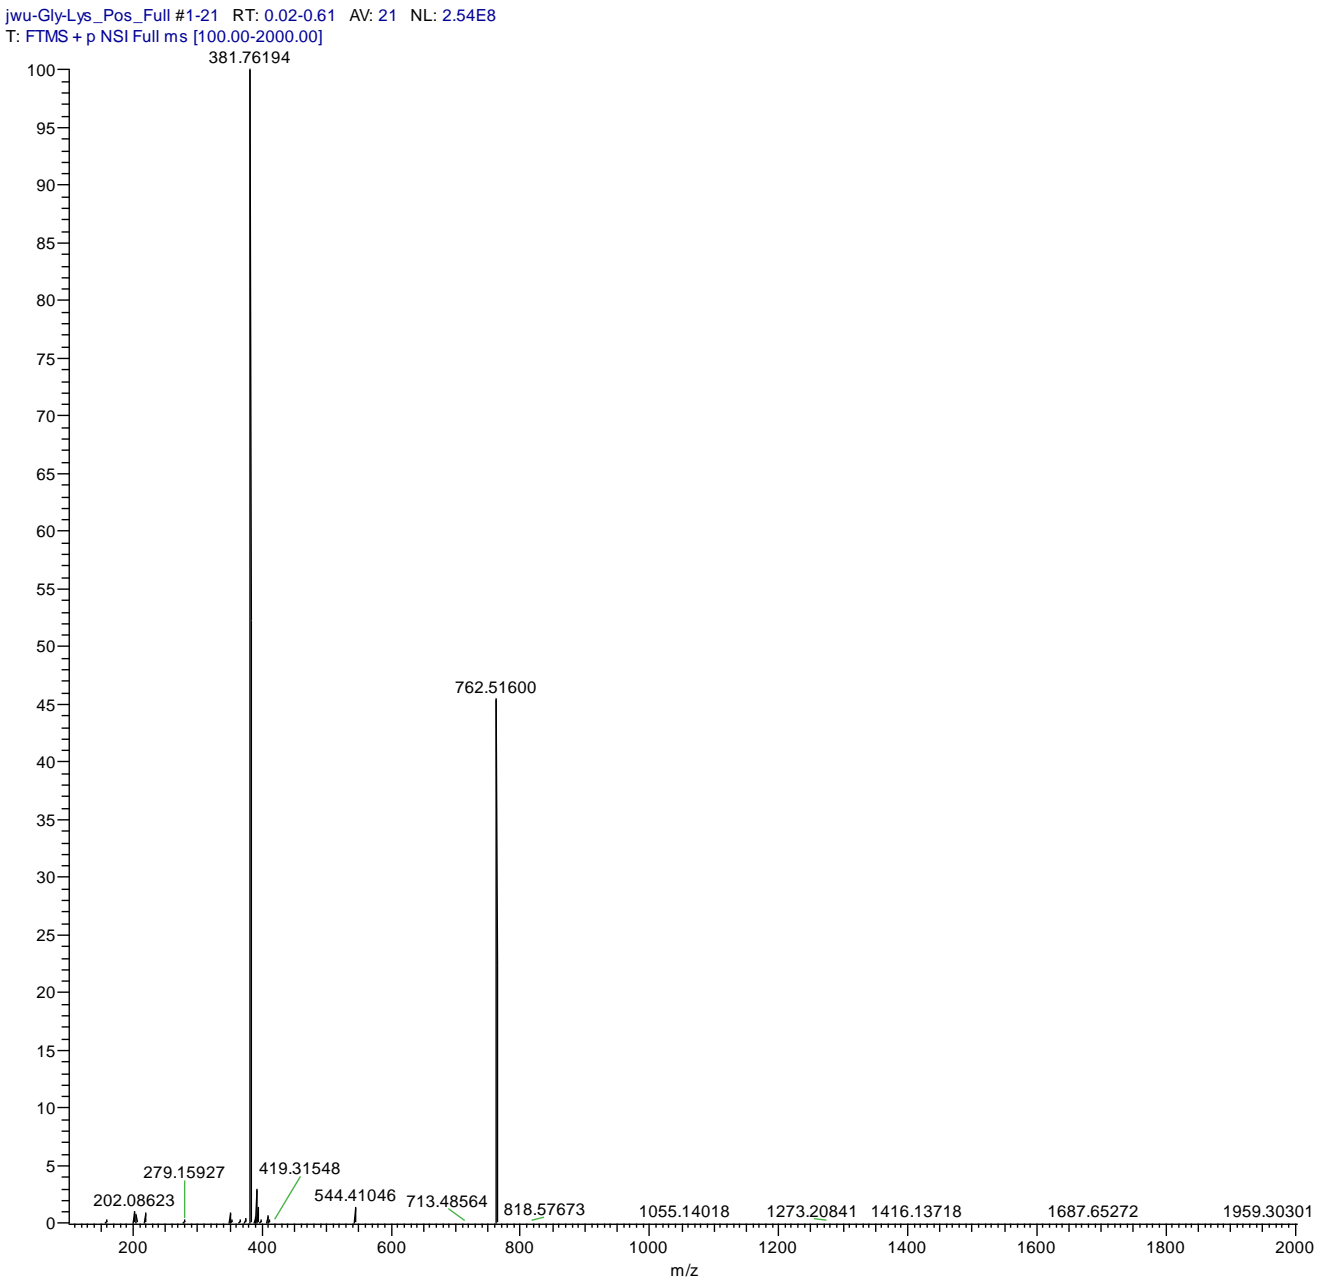

Zoomed spectrum

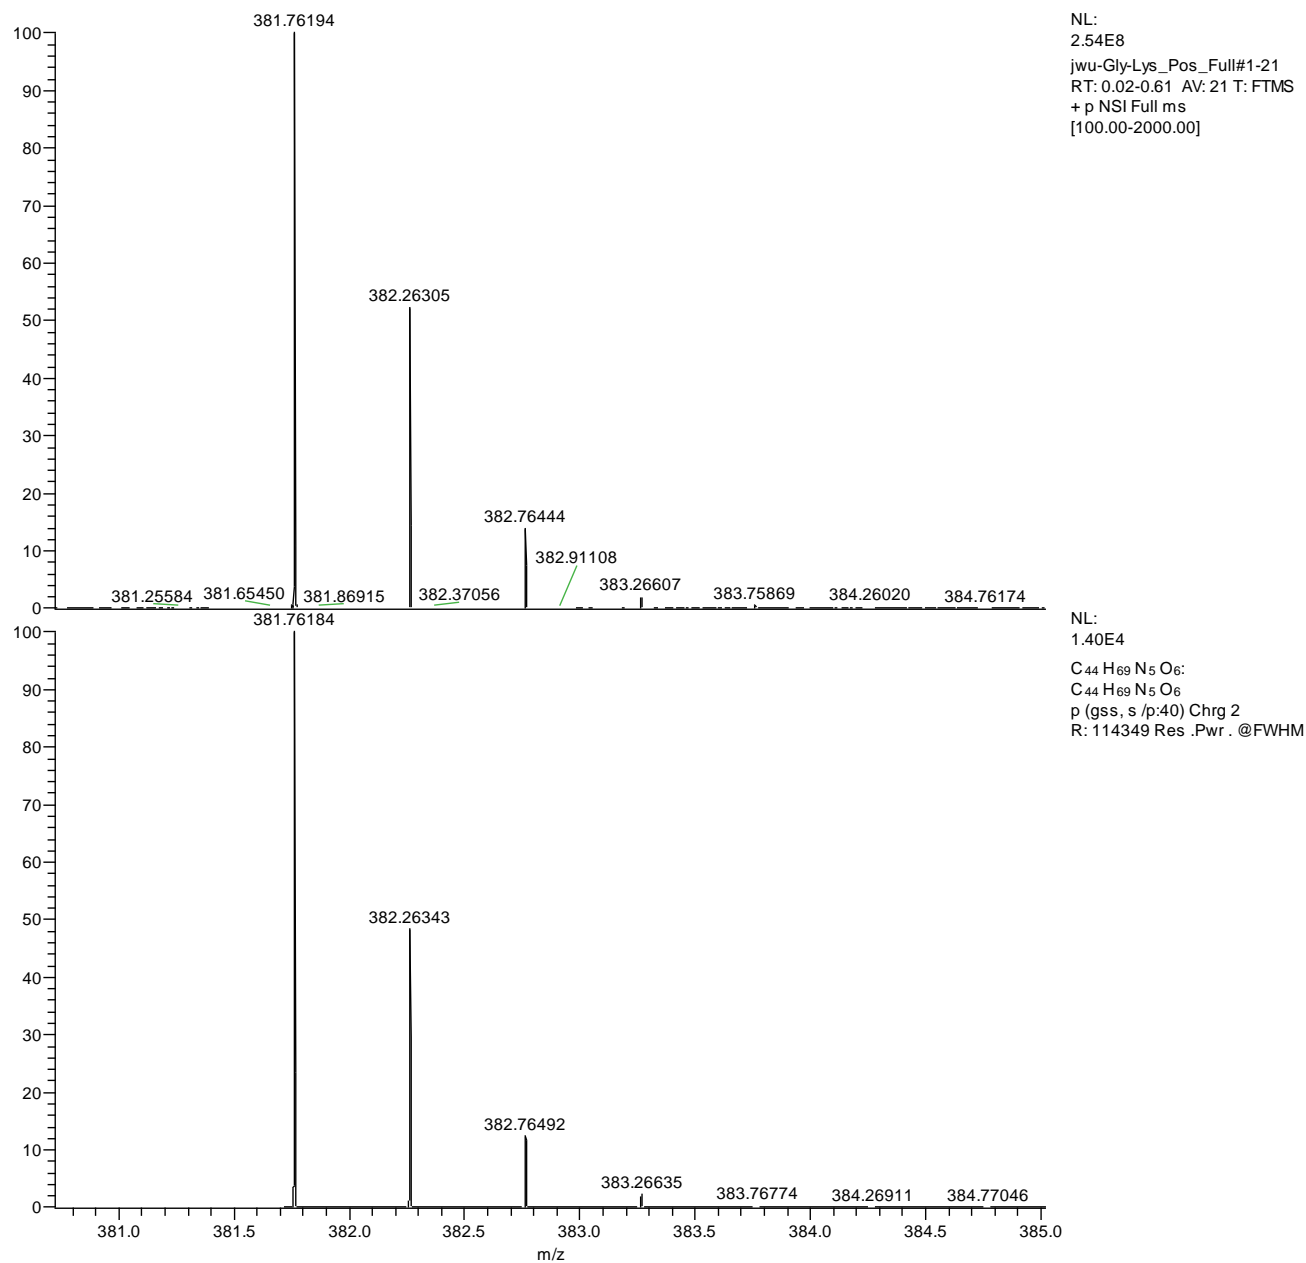



1,1',1''-((((3*R*,5*S*,7*R*,8*R*,9*S*,10*S*,12*S*,13*R*,14*S*,17*R*)-17-((*R*)-5-(((*S*)-3-(1*H*-Indol-3-yl)-1-methoxy-1-oxopropan-2-yl)amino)-5-oxopentan-2-yl)-10,13-dimethylhexadecahydro-1*H*-cyclopenta[*a*]phenanthrene-3,7,12-triyl)tris(oxy))tris(2-oxoethane-2,1-diyl))tris(azanediyl))tris(3-methyl-1-oxobutan-2-aminium) (**27**)

## Full spectrum

jwu-CA-Gly-Val\_Pos\_Full #2-25 RT: 0.05-0.70 AV: 24 NL: 1.72E7  
T: FTMS + p NSI Full ms [100.00-2000.00]

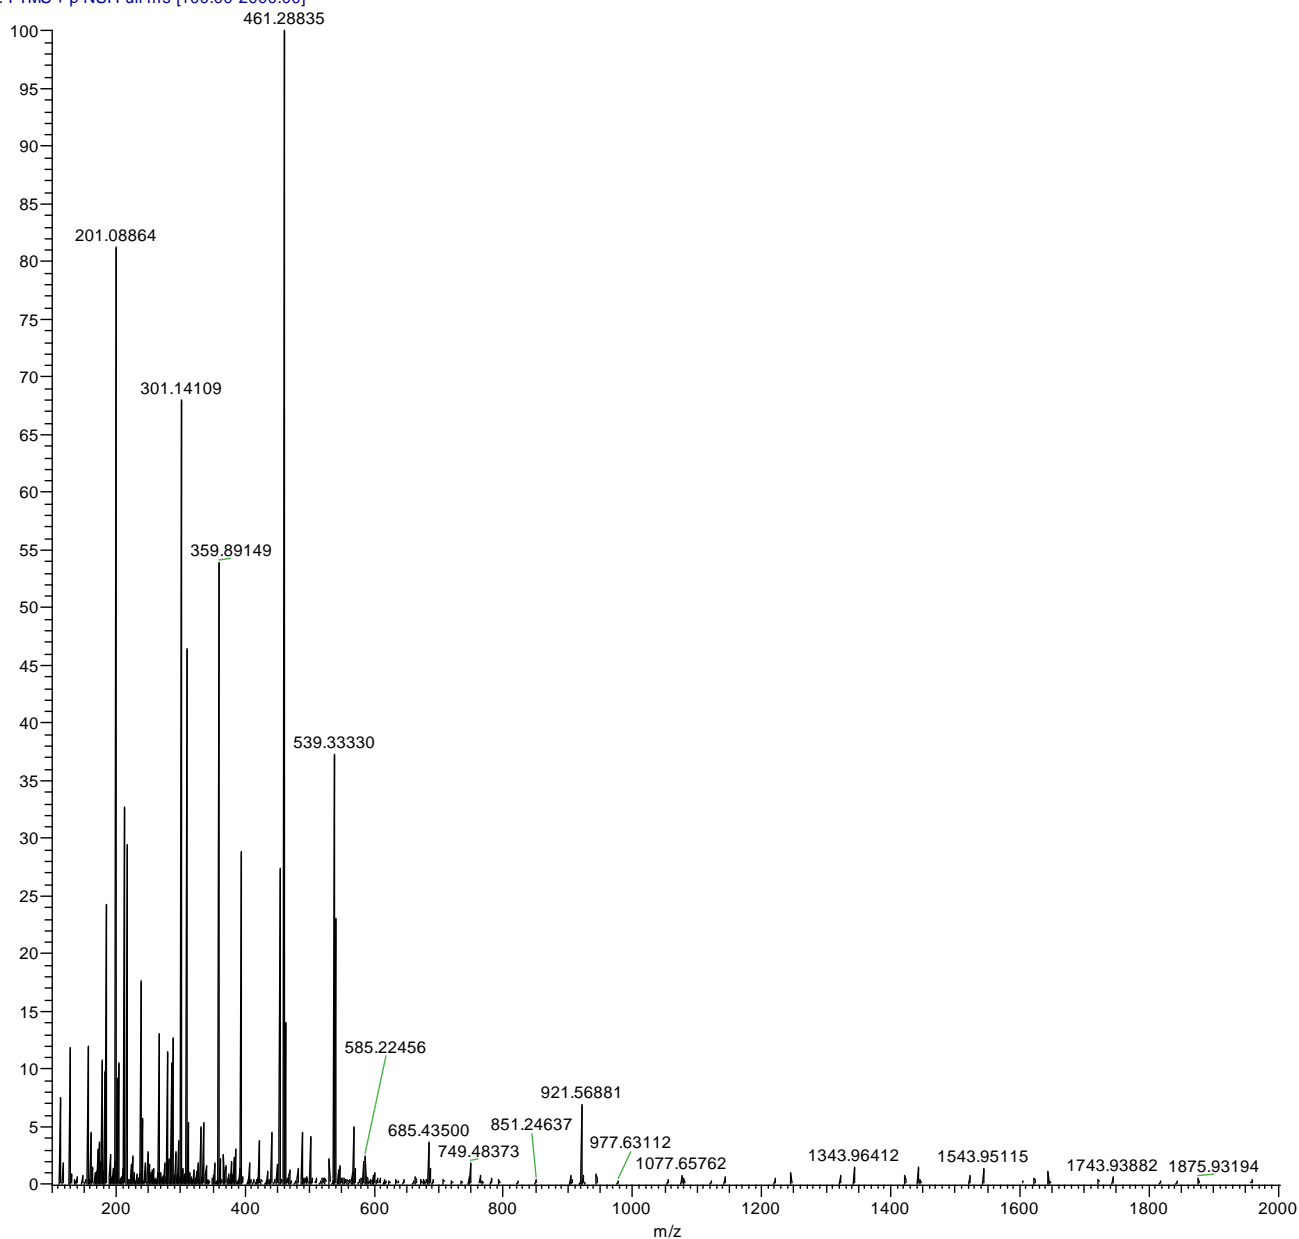

Zoomed spectrum (Top spectrum: measured mass; bottom spectrum: calculated mass)

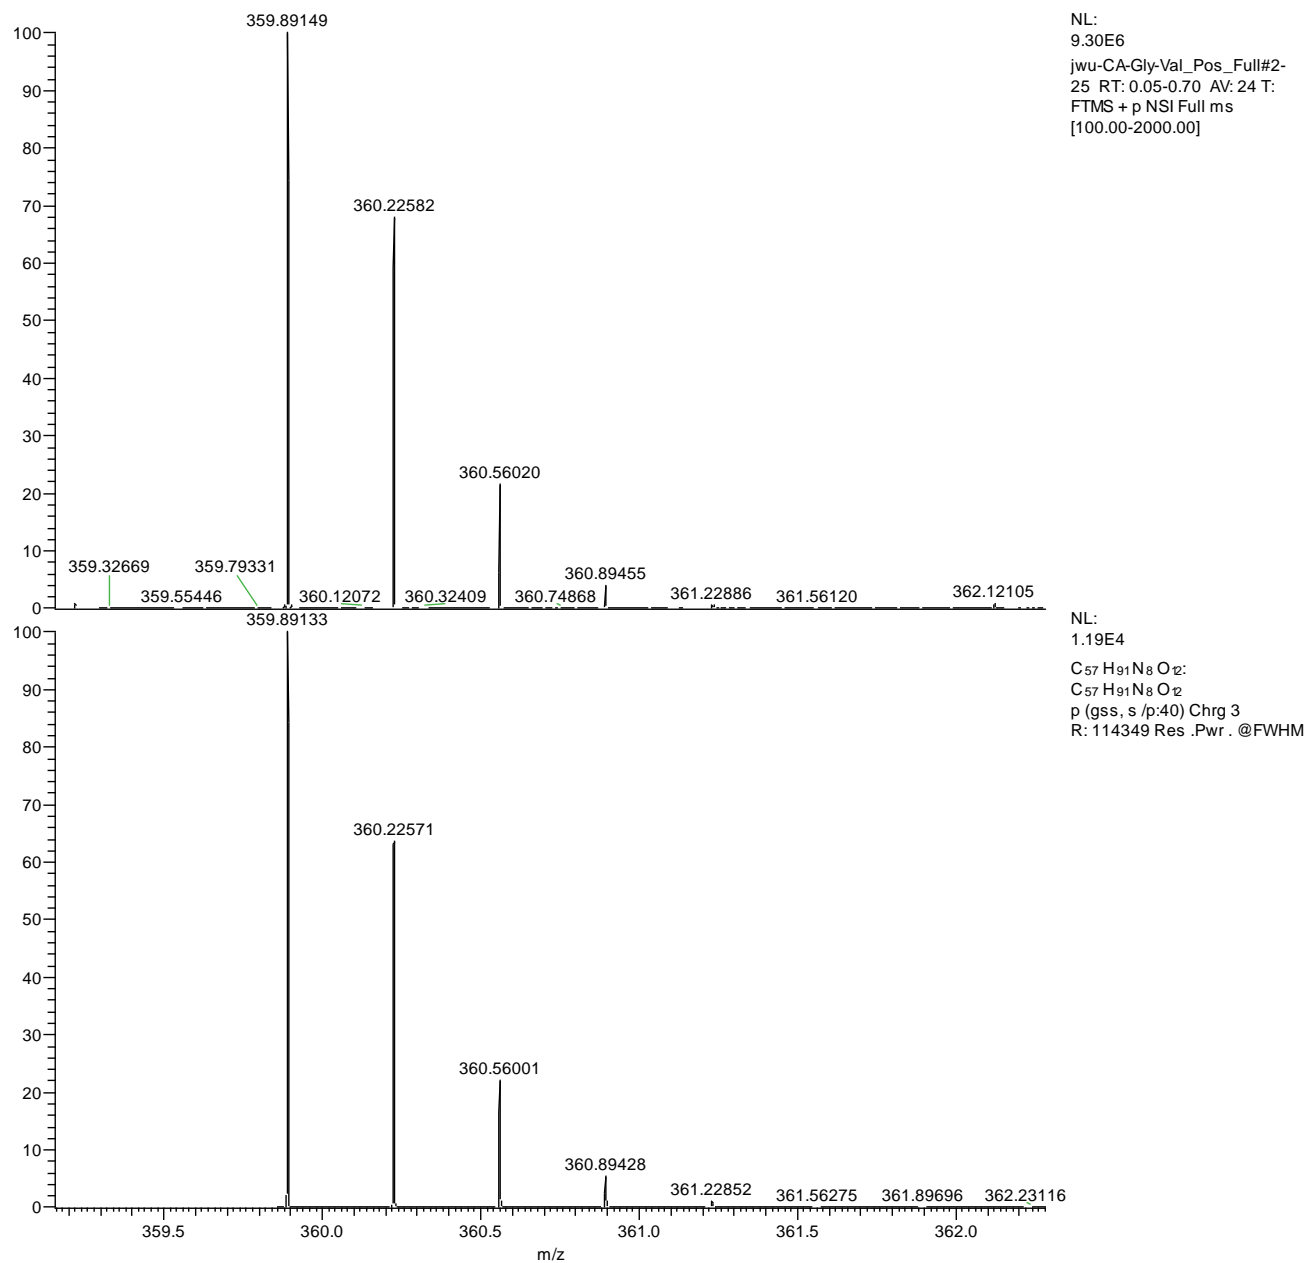

Supplement: s1 [file s1]
